# Supplementary material for: Metabolic Reprogramming of Clostridioides difficile During the Stationary Phase With the Induction of Toxin Production
Source: Front Microbiol. 2018 Aug 21;9:1970. doi: 10.3389/fmicb.2018.01970 (PMC6110889; doi:10.3389/fmicb.2018.01970)
Supplement: Supplementary file 4 [file Table_1.XLSX]

## Sheet: Tabelle1
Metabolic reprogramming with the induction of toxin production of Clostridioides difficile during the stationary phase
Supplemental File 1: Data of the microarray analysis of C. difficile 630∆erm following the course of growth. Log2 fold changes in gene transciption measured for C. difficile 630∆erm in transient phase (17.25 h, trans) and three times in stationary phase (19.25: stat1, 24.25: stat2 and 29.25 h: stat3) were compared to those of the exponential phase (14.5 h). Shown are the locus tags of of the arra…
Locus tag (Dannheim et al. 2017a)	Locus tag (array design)	Gene name	log2 FC				adj. p-value
			trans	stat1	stat2	stat3	trans	stat1	stat2	stat3
CDIF630erm_00001	[gene=CD630DERM_00010]	dnaA	-0.35	-0.4	-0.04	0.02	0.0138942	0.12475	0.00455756	0.0533046
CDIF630erm_00002	[gene=CD630DERM_00020]	dnaN	-0.45	-0.68	-0.53	-0.63	0.00685026	0.0891322	3.50693e-05	0.00043639
CDIF630erm_00003	[gene=CD630DERM_00030]		-0.59	-0.99	-1.13	-1.07	0.00131462	0.093894	4.29069e-06	7.77476e-05
CDIF630erm_00004	[gene=CD630DERM_00040]	recF	-0.54	-0.65	-0.59	-0.72	0.00156299	0.0735021	4.13336e-05	3.89721e-05
CDIF630erm_00005	[gene=CD630DERM_00050]	gyrB	-0.48	-0.31	0.85	0.39	0.000929496	0.0721691	0.512	0.0185919
CDIF630erm_00006	[gene=CD630DERM_00060]	gyrA	-0.48	-0.54	-0.19	-0.6	0.00231643	0.078891	0.0010924	2.46579e-05
CDIF630erm_00007	[gene=CD630DERM_00070]		0.01	-0.41	-1.32	-1.34	0.525242	0.325544	6.37965e-06	3.93139e-06
CDIF630erm_00008	[gene=CD630DERM_00080]		0.06	-0.14	-0.68	-0.56	0.883412	0.463835	1.04053e-05	2.29376e-05
CDIF630erm_00009	[gene=CD630DERM_00090]	rsbV	0.03	-0.23	-0.66	-0.73	0.870048	0.401536	1.13512e-05	9.63249e-06
CDIF630erm_00010	[gene=CD630DERM_00100]	rsbW	0.05	-0.11	-0.59	-0.74	0.617394	0.466461	6.97908e-06	7.56288e-06
CDIF630erm_00011	[gene=CD630DERM_00110]	sigB	0.04	-0.04	-0.53	-0.65	0.209793	0.454934	9.08071e-05	1.21171e-05
CDIF630erm_00021	[gene=CD630DERM_00120]	niaR	0.17	-0.08	-0.24	-0.35	0.0392237	0.557456	0.000430467	0.000580722
CDIF630erm_00022	[gene=CD630DERM_00130]	mscS	0.26	0.02	-0.06	-0.2	0.0103275	0.883253	0.251264	0.00125776
CDIF630erm_00024	[gene=CD630DERM_00140]	serS1	3.21	2.42	0.09	-0.58	0.000424463	0.0583092	0.00521161	2.95868e-05
CDIF630erm_00025	[gene=CD630DERM_00150]	tadA	-0.36	-0.62	-0.43	-0.09	0.0689191	0.128629	0.00157276	0.0862397
CDIF630erm_00030	[gene=CD630DERM_00160]	dnaX	-0.62	-0.44	-0.07	-0.25	0.00317119	0.0891322	0.00108466	0.00191875
CDIF630erm_00031	[gene=CD630DERM_00170]	ybaB	-0.37	-0.57	0.11	-0.41	0.00437552	0.069367	0.000198576	1.4514e-05
CDIF630erm_00032	[gene=CD630DERM_00180]	recR	-0.46	-0.76	-0.6	-0.89	0.00315057	0.0733857	3.4165e-05	2.22915e-05
CDIF630erm_00033	[gene=CD630DERM_00181]		-0.81	-0.92	-1.06	-1.11	0.00411776	0.0264144	1.82923e-05	9.63249e-06
CDIF630erm_00034	[gene=CD630DERM_00190]	ugtP1	-0.1	0.19	0.28	-0.02	0.0345383	0.514827	0.199672	0.0132515
CDIF630erm_00081	[gene=CD630DERM_00200]		-0.66	-0.65	-0.23	-0.37	0.00147657	0.0401231	0.00157108	2.80292e-05
CDIF630erm_00083	[gene=CD630DERM_00210]	pycA	-1.33	-0.92	-0.16	-0.76	0.000855996	0.0369775	0.000573481	7.09165e-05
CDIF630erm_00084	[gene=CD630DERM_00220]	fusA1	1.13	1.57	0.33	0.12	0.0102336	0.0562862	0.000822277	0.0369401
CDIF630erm_00085	[gene=CD630DERM_00230]	ctsR	0.53	0.29	0.26	1.96	0.00902775	0.228871	0.121384	1.38651e-05
CDIF630erm_00086	[gene=CD630DERM_00240]	mcsA	0.87	0.72	0.94	2.81	0.00213931	0.0503562	0.00110502	3.93139e-06
CDIF630erm_00087	[gene=CD630DERM_00250]	mcsB	0.9	0.83	1.21	2.66	0.00117314	0.050883	0.000110075	3.93139e-06
CDIF630erm_00088	[gene=CD630DERM_00260]	clpC	1.05	1.19	2.03	2.99	0.000900312	0.0629552	1.84397e-05	3.93139e-06
CDIF630erm_00089	[gene=CD630DERM_00270]	radA	0.41	0.28	0.76	1.65	0.00732736	0.396897	0.000470379	2.06298e-05
CDIF630erm_00090	[gene=CD630DERM_00280]	disA	0.49	0.29	0.65	1.49	0.0152105	0.316289	0.000889926	1.05974e-05
CDIF630erm_00091	[gene=CD630DERM_00290]		-0.26	-0.46	-0.04	0.3	0.0121079	0.125924	0.000711063	0.0944428
CDIF630erm_00092	[gene=CD630DERM_00300]		-0.29	-0.47	-0.29	-0.24	0.0110385	0.143934	4.49459e-05	0.000347064
CDIF630erm_00093	[gene=CD630DERM_00310]		0.02	0.04	0.1	0.02	0.543805	0.593392	0.00403736	0.00481471
CDIF630erm_00094	[gene=CD630DERM_00320]	exgA	-0.19	-0.08	0.31	0.62	0.00410523	0.854353	0.000209837	9.11634e-05
CDIF630erm_00095	[gene=CD630DERM_00330]		0.07	0.7	1.52	1.09	0.126287	0.210582	2.86268e-05	1.17873e-05
CDIF630erm_00096	[gene=CD630DERM_00340]		0.1	0.44	1.1	0.97	0.00564327	0.174935	1.00025e-05	1.72406e-05
CDIF630erm_00097	[gene=CD630DERM_00350]		0.09	0.11	0.06	0.11	0.00322454	0.280414	0.00492118	0.0012888
CDIF630erm_00098	[gene=CD630DERM_00360]	acoA	0.29	0.46	1.17	1.05	0.00532814	0.110852	1.57416e-05	1.05884e-05
CDIF630erm_00099	[gene=CD630DERM_00370]	acoB	0.31	0.3	-0.09	0.19	0.00143852	0.105041	0.895814	0.00473592
CDIF630erm_00100	[gene=CD630DERM_00380]	acoC	0.31	0.51	0.56	0.7	0.00221557	0.110859	3.38e-05	1.20185e-05
CDIF630erm_00101	[gene=CD630DERM_00390]	acoL	0.3	0.89	1.11	1	0.00606405	0.106674	2.91009e-05	8.76959e-06
CDIF630erm_00102	[gene=CD630DERM_00400]		0.01	0.01	0.51	0.4	0.413883	0.54858	2.95066e-05	4.61614e-05
CDIF630erm_00103	[gene=CD630DERM_00410]		0.01	0.06	0.19	0.17	0.370984	0.463806	0.000144413	0.000126161
CDIF630erm_00104	[gene=CD630DERM_00420]		0.07	0.05	-0.04	0.08	0.0138709	0.484122	0.742218	0.00359931
CDIF630erm_00105	[gene=CD630DERM_00430]		0.14	0.23	0.32	0.31	0.00546958	0.16276	4.25499e-05	2.31215e-05
CDIF630erm_00106	[gene=CD630DERM_00440]		0.05	0.08	0.19	0.16	0.0182168	0.375567	0.00016556	0.00045437
CDIF630erm_00107	[gene=CD630DERM_00450]		0.08	0.28	0.46	0.3	0.00603231	0.158145	2.69634e-05	2.83481e-05
CDIF630erm_00108	[gene=CD630DERM_00460]		-0.03	-0.04	-0.16	-0.24	0.808895	0.960556	0.0473342	0.0022855
CDIF630erm_00109	[gene=CD630DERM_00470]	ispD	-0.17	0.17	0.65	0.71	0.00750617	0.368693	0.000369119	0.000450611
CDIF630erm_00110	[gene=CD630DERM_00480]	ispF	-0.34	-0.11	0.61	0.4	0.00156934	0.996296	0.00908958	0.000366297
CDIF630erm_00112	[gene=CD630DERM_00490]	proS1	0.82	0.49	-0.05	-0.25	0.00928412	0.482218	0.0122467	0.0521392
CDIF630erm_00113	[gene=CD630DERM_00500]	proS2	0.94	1.32	-0.33	-0.8	0.00316214	0.0338329	3.65449e-05	4.83229e-05
CDIF630erm_00114	[gene=CD630DERM_00510]	gltX	-0.31	-0.48	-0.03	-0.49	0.00249931	0.0836579	0.000327901	1.42306e-05
CDIF630erm_00115	[gene=CD630DERM_00511]		0.31	-0.59	-1.07	0.88	0.343728	0.170208	2.41726e-05	0.0269362
CDIF630erm_00116	[gene=CD630DERM_00520]	cysS	0.78	0.59	1.32	1.67	0.00307394	0.45963	5.37039e-05	0.00010434
CDIF630erm_00117	[gene=CD630DERM_00530]	mrnC	0.73	0.38	0.16	1.17	0.0034651	0.728989	0.0292745	0.000299577
CDIF630erm_00118	[gene=CD630DERM_00540]	thyX	0.14	-0.04	0.28	-0.01	0.709849	0.303265	0.0324433	0.000372137
CDIF630erm_00119	[gene=CD630DERM_00550]		0.13	-0.16	-0.11	-0.29	0.862345	0.199872	0.000147454	0.00022803
CDIF630erm_00120	[gene=CD630DERM_00560]		0.08	-0.44	-0.33	-0.59	0.905957	0.194533	2.26554e-05	0.000222047
CDIF630erm_00121	[gene=CD630DERM_00570]	sigH	0.19	-0.02	-0.59	-0.64	0.214472	0.466543	2.66268e-05	0.000129233
CDIF630erm_00122	[gene=CD630DERM_00580]	tuf1	-0.53	-0.33	-1.02	-1.24	0.0020127	0.0325396	5.87333e-05	0.000405096
CDIF630erm_00123	[gene=CD630DERM_00581]	rpmG	-0.73	-0.96	-1.37	-1.82	0.00234761	0.0445367	1.79428e-05	4.48847e-05
CDIF630erm_00124	[gene=CD630DERM_00590]	secE	-0.63	-0.8	-1.54	-1.87	0.00168118	0.0401231	1.92028e-05	5.18787e-05
CDIF630erm_00125	[gene=CD630DERM_00600]	nusG	-0.57	-0.8	-1.64	-1.92	0.00255951	0.046597	2.75398e-05	8.83936e-05
CDIF630erm_00126	[gene=CD630DERM_00610]	rplK	-0.71	-0.76	-1.8	-2.21	0.00195352	0.0262968	9.42701e-06	3.23995e-05
CDIF630erm_00127	[gene=CD630DERM_00620]	rplA	-0.68	-0.69	-2.02	-2.37	0.0020127	0.025217	1.37791e-05	3.04256e-05
CDIF630erm_00129	[gene=CD630DERM_00630]	rplJ	-0.75	-0.86	-2.37	-3.52	0.00258693	0.0240707	5.04889e-06	4.8266e-06
CDIF630erm_00130	[gene=CD630DERM_00640]	rplL	-0.78	-0.43	-2.84	-3.79	0.000905421	0.0223888	4.00028e-06	5.90577e-06
CDIF630erm_00131	[gene=CD630DERM_00650]		0.82	0.55	0.51	1.38	0.00482537	0.17059	0.000737233	2.80292e-05
CDIF630erm_00132	[gene=CD630DERM_00660]	rpoB	-0.29	-0.67	-0.42	-0.71	0.00267016	0.119424	2.1161e-05	7.91311e-06
CDIF630erm_00133	[gene=CD630DERM_00670]	rpoC	-0.28	-0.61	-0.55	-0.76	0.00271568	0.105302	8.02457e-06	9.35245e-06
CDIF630erm_00134	[gene=CD630DERM_00680]	rpsL	-0.63	-0.91	-1.09	-0.88	0.00161345	0.0708947	0.000162753	0.00259669
CDIF630erm_00135	[gene=CD630DERM_00690]	rpsG	-0.66	-1.35	-1.71	-1.06	0.00107157	0.0858999	0.000236259	0.00194622
CDIF630erm_00136	[gene=CD630DERM_00700]	fusA2	-0.65	-1.13	-1.62	-1.08	0.00206023	0.0623623	0.00017049	0.00180978
CDIF630erm_00137	[gene=CD630DERM_00710]	tuf2	-0.53	-0.34	-1.44	-1.38	0.00171024	0.0332877	4.39206e-05	0.000429342
CDIF630erm_00138	[gene=CD630DERM_00720]	rpsJ	-0.64	-1.02	-1.18	-1.27	0.00272427	0.053612	3.32752e-05	0.00105327
CDIF630erm_00139	[gene=CD630DERM_00730]	rplC	-0.54	-0.63	-1.44	-1.22	0.00370987	0.0448214	0.000144724	0.00306403
CDIF630erm_00140	[gene=CD630DERM_00740]	rplD	-0.57	-0.48	-0.63	-0.7	0.00173407	0.0370572	0.000285609	0.00280033
CDIF630erm_00141	[gene=CD630DERM_00750]	rplW	-0.6	-0.75	-1.78	-1.36	0.00213828	0.0428703	0.000186396	0.00189017
CDIF630erm_00142	[gene=CD630DERM_00760]	rplB	-0.6	-0.56	-1.51	-1.26	0.00372	0.0370572	0.000134634	0.00235512
CDIF630erm_00143	[gene=CD630DERM_00770]	rpsS	-0.64	-0.67	-1.72	-1.43	0.00213898	0.0399008	0.000112443	0.00164616
CDIF630erm_00144	[gene=CD630DERM_00780]	rplV	-0.62	-0.7	-1.45	-1.32	0.00327915	0.0524818	8.602e-05	0.00172616
CDIF630erm_00145	[gene=CD630DERM_00790]	rpsC	-0.57	-0.58	-1.12	-1.09	0.00347524	0.0658135	0.000178418	0.00277917
CDIF630erm_00146	[gene=CD630DERM_00800]	rplP	-0.53	-0.16	-0.15	-0.82	0.00374148	0.0379811	0.000147764	0.00346299
CDIF630erm_00147	[gene=CD630DERM_00801]	rpmC	-0.62	-0.49	-1.66	-1.52	0.00196848	0.0322759	0.000127096	0.00128145
CDIF630erm_00148	[gene=CD630DERM_00810]	rpsQ	-0.58	-0.33	-1.61	-1.52	0.00166576	0.032438	0.000125326	0.00291935
CDIF630erm_00149	[gene=CD630DERM_00820]	rplN	-0.57	-0.29	-1.92	-1.55	0.00272055	0.0358755	0.000154601	0.00325189
CDIF630erm_00150	[gene=CD630DERM_00830]	rplX	-0.61	-0.38	-1.77	-1.53	0.0024088	0.0322759	0.000152851	0.0027997
CDIF630erm_00151	[gene=CD630DERM_00840]	rplE	-0.63	-0.48	-1.88	-1.62	0.00199037	0.0392594	0.000144413	0.0025761
CDIF630erm_00152	[gene=CD630DERM_00841]	rpsZ	-0.63	-0.46	-1.86	-1.6	0.00133629	0.03998	0.000149144	0.00264068
CDIF630erm_00153	[gene=CD630DERM_00850]	rpsH	-0.66	-0.6	-1.9	-1.65	0.0020127	0.053612	0.00012085	0.00270187
CDIF630erm_00154	[gene=CD630DERM_00860]	rplF	-0.64	-0.65	-1.92	-1.69	0.00180004	0.0659825	0.000119685	0.00229698
CDIF630erm_00155	[gene=CD630DERM_00870]	rplR	-0.65	-0.74	-1.86	-1.72	0.0020225	0.0820972	0.000102405	0.00210162
CDIF630erm_00156	[gene=CD630DERM_00880]	rpsE	-0.56	-0.57	-1.42	-1.49	0.00255394	0.0742011	0.000165546	0.00270522
CDIF630erm_00157	[gene=CD630DERM_00881]	rpmD	-0.65	-0.81	-2.03	-1.82	0.0020225	0.0879642	0.000130465	0.00146868
CDIF630erm_00158	[gene=CD630DERM_00890]	rplO	-0.61	-0.84	-2.12	-1.8	0.00127054	0.105302	0.000131727	0.00186615
CDIF630erm_00159	[gene=CD630DERM_00900]	secY	-0.63	-0.52	-1.46	-1.55	0.00249931	0.12194	4.27322e-05	0.00212541
CDIF630erm_00160	[gene=CD630DERM_00910]	adk	-0.54	-0.83	-1.66	-1.55	0.00615171	0.110965	8.46857e-05	0.002505
CDIF630erm_00161	[gene=CD630DERM_00920]	map1	-0.53	-0.89	-1.54	-1.57	0.00603637	0.113516	6.17895e-05	0.00184415
CDIF630erm_00162	[gene=CD630DERM_00930]		-0.6	-0.95	-1.73	-1.66	0.00230759	0.12935	6.00934e-05	0.000457994
CDIF630erm_00163	[gene=CD630DERM_00940]	infA	-0.61	-0.86	-1.6	-1.7	0.00255394	0.0991393	3.48489e-05	0.00114473
CDIF630erm_00164	[gene=CD630DERM_00941]	rpmJ	-0.62	-0.93	-2.06	-1.95	0.00346973	0.135579	8.92647e-05	0.0010623
CDIF630erm_00165	[gene=CD630DERM_00950]	rpsM	-0.65	-0.78	-2.05	-1.96	0.002665	0.0720509	6.65462e-05	0.000811868
CDIF630erm_00166	[gene=CD630DERM_00960]	rpsK	-0.64	-0.46	-1.89	-1.93	0.00235349	0.0306582	4.75951e-05	0.000580914
CDIF630erm_00167	[gene=CD630DERM_00970]	rpsD	-0.67	-0.56	-1.21	-1.72	0.00218013	0.0370572	3.55944e-05	0.000444874
CDIF630erm_00168	[gene=CD630DERM_00980]	rpoA	-0.72	-0.95	-2.13	-2.13	0.00242843	0.0900066	4.12174e-05	0.000371359
CDIF630erm_00169	[gene=CD630DERM_00990]	rplQ	-0.77	-0.79	-2.02	-2.1	0.0020127	0.0500768	1.57416e-05	0.00017346
CDIF630erm_00170	[gene=CD630DERM_01000]	ecfA1	0.06	-0.09	-0.1	-0.32	0.968422	0.438974	0.000790997	0.00131621
CDIF630erm_00171	[gene=CD630DERM_01010]	ecfA2	0.03	0.02	0.06	-0.11	0.303611	0.635196	0.0214036	0.0019694
CDIF630erm_00172	[gene=CD630DERM_01020]	ecfT	0	-0.23	-0.29	-0.39	0.297142	0.265646	5.20139e-05	0.000159523
CDIF630erm_00173	[gene=CD630DERM_01030]	truA1	0	-0.15	-0.14	-0.24	0.151572	0.303265	0.00204949	0.000214091
CDIF630erm_00174	[gene=CD630DERM_01040]	rplM	-0.54	-1.3	-1.4	-1.49	0.00223307	0.072217	2.6355e-05	0.000173895
CDIF630erm_00175	[gene=CD630DERM_01050]	rpsI	-0.54	-1.06	-0.5	-1.02	0.00343019	0.069367	5.87333e-05	0.000175033
CDIF630erm_00176	[gene=CD630DERM_01060]	cwlD	-0.37	-0.27	-0.14	-0.08	0.00060789	0.261386	0.426374	0.18605
CDIF630erm_00203	[gene=CD630DERM_01070]	aspC	-0.5	-0.61	-0.35	-0.95	0.00241404	0.0621212	2.33564e-05	2.13712e-05
CDIF630erm_00204	[gene=CD630DERM_01080]	nrdD	0.43	0.07	-0.4	-0.21	0.0215819	0.646184	0.000997814	0.000649082
CDIF630erm_00205	[gene=CD630DERM_01090]	nrdG	0.4	0.46	0.02	0.12	0.0259002	0.470598	0.00429827	0.384861
CDIF630erm_00225	[gene=CD630DERM_01100]	ybbP	-0.05	-0.01	0.35	0.49	0.172509	0.966234	0.00309164	9.52435e-05
CDIF630erm_00226	[gene=CD630DERM_01110]		-0.05	-0.14	-0.21	-0.24	0.0869077	0.376118	0.00106274	0.000296045
	[gene=CD630DERM_01111]		-0.09	-0.15	-0.17	-0.24	0.0264379	0.311339	0.0527903	0.000874487
CDIF630erm_00227	[gene=CD630DERM_01120]	ptb1	-0.04	0.32	1.02	1.68	0.379156	0.49069	0.00285724	0.000111988
CDIF630erm_00228	[gene=CD630DERM_01130]	buk	-0.01	0.31	1.03	1.71	0.495904	0.557456	0.0159573	0.000136696
CDIF630erm_00229	[gene=CD630DERM_01140]		0.15	0.73	0.97	1.54	0.77519	0.259298	0.0227136	0.000110908
CDIF630erm_00230	[gene=CD630DERM_01150]	vorC1	0.64	2.05	1.59	1.48	0.0388034	0.130844	0.019822	7.80931e-05
CDIF630erm_00231	[gene=CD630DERM_01160]	vorB1	0.68	2.42	2.13	1.65	0.0171635	0.125421	0.0041565	4.79886e-05
CDIF630erm_00232	[gene=CD630DERM_01170]	vorA1	0.65	2.59	1.36	1.29	0.0201257	0.149725	0.0192991	0.000139241
CDIF630erm_00233	[gene=CD630DERM_01180]	vorA*1	0.61	2.8	1.71	1.4	0.031924	0.154675	0.00310001	5.85707e-05
CDIF630erm_00234	[gene=CD630DERM_01190]	glmM	-0.49	-0.51	-0.74	-1.45	0.00384281	0.0651262	5.04889e-06	5.19276e-06
CDIF630erm_00236	[gene=CD630DERM_01200]	glmS	-0.02	0.15	-0.2	-0.86	0.192941	0.316897	0.00205613	3.08599e-05
CDIF630erm_00237	[gene=CD630DERM_01210]		-0.06	-0.32	-0.17	-0.23	0.359159	0.19866	0.00060679	9.28329e-05
CDIF630erm_00238	[gene=CD630DERM_01220]		-0.3	-0.41	-0.35	-0.49	0.0253156	0.11474	0.000155503	2.76933e-05
CDIF630erm_00239	[gene=CD630DERM_01230]	murA	-0.36	-0.68	-0.56	-0.78	0.0110496	0.0691388	0.000165375	2.80842e-05
CDIF630erm_00240	[gene=CD630DERM_01240]	spoIID	-0.54	-0.6	-0.23	-0.54	0.00585434	0.0515169	0.000367867	2.46579e-05
CDIF630erm_00241	[gene=CD630DERM_01250]		-0.61	-0.54	-0.26	-0.58	0.00316942	0.0583092	0.000122989	2.06703e-05
CDIF630erm_00242	[gene=CD630DERM_01260]	spoIIID	-0.13	0	0.36	0.44	0.00943262	0.631403	0.000398284	0.000169836
CDIF630erm_00243	[gene=CD630DERM_01270]	mreB1	-0.11	-0.52	-0.41	-0.68	0.0175574	0.130151	0.0001739	2.41192e-05
CDIF630erm_00244	[gene=CD630DERM_01280]	fabZ	-0.12	-0.38	0.36	0.01	0.00489877	0.12194	0.0146834	0.000768323
CDIF630erm_00245	[gene=CD630DERM_01290]		0.12	0.08	0.49	0.5	0.00296661	0.356772	5.77864e-05	1.05709e-05
CDIF630erm_00247	[gene=CD630DERM_01300]	metK	-1.23	-1.41	-0.51	-1.42	0.00179055	0.0129124	4.39206e-05	2.70654e-05
CDIF630erm_00248	[gene=CD630DERM_01310]		0.24	0.87	1.44	1.19	0.0480172	0.149188	1.14854e-05	9.92081e-06
CDIF630erm_00249	[gene=CD630DERM_01320]	yrrC	-0.1	-0.07	-0.08	-0.17	0.0868559	0.985021	0.756648	0.0167887
CDIF630erm_00250	[gene=CD630DERM_01330]		-0.27	-0.39	-0.45	-0.52	0.00196379	0.130151	4.43968e-05	3.42814e-05
CDIF630erm_00251	[gene=CD630DERM_01340]		-0.17	-0.33	-0.4	-0.42	0.00437536	0.157247	0.000101929	4.10015e-05
CDIF630erm_00252	[gene=CD630DERM_01350]		-0.05	0.03	0.35	0.33	0.077382	0.633653	4.08123e-05	7.87098e-05
CDIF630erm_00253	[gene=CD630DERM_01360]		0.01	0.03	0.05	0.09	0.261568	0.543448	0.0134556	0.00112604
CDIF630erm_00254	[gene=CD630DERM_01370]		0.15	0.29	0.42	0.37	0.00249931	0.151388	4.7806e-05	4.53258e-05
CDIF630erm_00255	[gene=CD630DERM_01380]		0.07	0.19	0.67	0.52	0.0111378	0.233867	1.00025e-05	2.62562e-05
CDIF630erm_00256	[gene=CD630DERM_01390]		0.05	0.13	0.08	0.02	0.0461579	0.281878	0.00112176	0.0370094
CDIF630erm_00257	[gene=CD630DERM_01400]		0.02	0.4	1.19	1.05	0.983353	0.309387	1.82923e-05	3.31237e-05
CDIF630erm_00258	[gene=CD630DERM_01410]	cutC	0.02	-0.04	-0.05	-0.1	0.120119	0.902479	0.126008	0.074757
CDIF630erm_00259	[gene=CD630DERM_01420]		0.74	1.59	0.09	-0.1	0.00177582	0.12194	8.00314e-05	0.00300195
CDIF630erm_00260	[gene=CD630DERM_01430]	secA1	-0.15	-0.32	-0.21	-0.38	0.0116277	0.14514	7.94755e-05	0.000132086
CDIF630erm_00262	[gene=CD630DERM_01440]	prfB	-0.25	-0.25	-0.2	-0.5	0.00226893	0.165524	4.12174e-05	2.06298e-05
CDIF630erm_00263	[gene=CD630DERM_01450]		-0.27	-0.33	-0.23	-0.21	0.00839682	0.170208	0.00477218	0.000191071
CDIF630erm_00264	[gene=CD630DERM_01460]		-0.26	-0.09	-0.12	-0.1	0.00367919	0.5723	0.0207177	0.00306427
CDIF630erm_00266	[gene=CD630DERM_01470]	ribU	4.39	3.84	-0.11	-0.23	0.00060789	0.0259057	0.0329945	0.0129764
CDIF630erm_00267	[gene=CD630DERM_01480]		0.61	0.38	-0.13	0.08	0.000969115	0.31775	0.387727	0.0137233
CDIF630erm_00268	[gene=CD630DERM_01490]	tsaE	0.16	-0.41	-1.1	-0.74	0.044645	0.280747	2.16517e-05	5.74002e-05
CDIF630erm_00269	[gene=CD630DERM_01500]	tsaB	0.23	-0.14	-0.38	-0.26	0.0147782	0.451906	0.000212976	0.000208701
CDIF630erm_00270	[gene=CD630DERM_01510]	rimI	0.2	-0.14	-0.28	-0.18	0.0178112	0.401536	8.95073e-05	0.00260303
CDIF630erm_00271	[gene=CD630DERM_01520]	tsaD	0.28	0.44	0.58	0.82	0.00981278	0.152688	0.00212119	0.000223275
CDIF630erm_00272	[gene=CD630DERM_01530]	hpdB	0.08	0.13	0.2	0.02	0.721721	0.943376	0.569608	0.00181048
CDIF630erm_00273	[gene=CD630DERM_01540]	hpdC	0.08	0	-0.65	-0.52	0.42772	0.787915	0.000202561	0.000123154
CDIF630erm_00274	[gene=CD630DERM_01550]	hpdA	0.11	0.48	0.73	0.37	0.247182	0.164565	0.0017975	0.0309457
CDIF630erm_00275	[gene=CD630DERM_01560]		-0.35	-0.46	-0.48	-0.51	0.0015227	0.0902508	2.76666e-05	2.31215e-05
	[gene=CD630DERM_01570]		0.52	0.31	-0.04	0.03	0.00138022	0.257359	0.589455	0.0682735
CDIF630erm_00278	[gene=CD630DERM_01590]		-0.39	-0.56	-0.62	-0.67	0.00086753	0.0673668	2.37204e-05	7.87098e-05
CDIF630erm_00279	[gene=CD630DERM_01600]		-0.06	-0.09	0.02	-0.11	0.175486	0.746406	0.047669	0.13031
CDIF630erm_00280	[gene=CD630DERM_01610]		0.05	0.07	0.14	0.14	0.0163539	0.409037	0.00028889	0.000149037
CDIF630erm_00281	[gene=CD630DERM_01620]		-0.03	0.01	0.13	0.03	0.224409	0.680256	0.000318141	0.00701116
CDIF630erm_00282	[gene=CD630DERM_01630]		0.11	0.08	0.06	0	0.00305426	0.380132	0.00198063	0.00721266
CDIF630erm_00283	[gene=CD630DERM_01631]		0.09	0.08	0.18	0.1	0.0082419	0.358126	0.000230905	0.000761349
CDIF630erm_00284	[gene=CD630DERM_01632]		0.31	0.46	-0.51	-0.56	0.00778287	0.322346	0.000513954	1.97222e-05
CDIF630erm_00285	[gene=CD630DERM_01640]		0.09	0.06	-0.05	-0.09	0.0440686	0.51439	0.778199	0.0686922
CDIF630erm_00286	[gene=CD630DERM_01650]		0.03	0.17	0.26	0.21	0.0640244	0.214663	6.46337e-05	4.60272e-05
CDIF630erm_00287	[gene=CD630DERM_01660]		0.2	0.37	0.54	0.46	0.00119396	0.0924002	1.45128e-05	1.27914e-05
CDIF630erm_00288	[gene=CD630DERM_01670]		0.05	0.12	0.36	0.24	0.0339942	0.281269	4.12174e-05	9.6731e-05
CDIF630erm_00289	[gene=CD630DERM_01680]		0.14	0.06	-0.16	-0.2	0.00506852	0.510826	0.240632	0.000685136
CDIF630erm_00290	[gene=CD630DERM_01690]		0.09	0.23	1.02	0.72	0.515734	0.771492	0.000596592	0.000205742
CDIF630erm_00291	[gene=CD630DERM_01700]		-0.18	-0.2	-0.72	-0.84	0.00161423	0.0907373	1.00897e-05	2.06703e-05
CDIF630erm_00292	[gene=CD630DERM_01710]	rex	-0.01	-0.44	-0.18	-0.13	0.67405	0.273503	0.00125562	0.0489769
CDIF630erm_00293	[gene=CD630DERM_01720]		0	-0.06	-0.52	-0.13	0.932429	0.611772	0.00131146	0.0142753
CDIF630erm_00294	[gene=CD630DERM_01721]	fdxA	0.3	1.74	-0.4	-0.1	0.00327915	0.741197	0.000406926	0.000101713
CDIF630erm_00295	[gene=CD630DERM_01730]	capA	0.12	0.29	0.85	0.7	0.011332	0.267031	4.64305e-05	2.26715e-05
CDIF630erm_00296	[gene=CD630DERM_01740]		2.15	2.14	3.05	4.61	0.00120436	0.053612	0.00052557	7.45085e-05
CDIF630erm_00297	[gene=CD630DERM_01750]		2.19	1.97	2.85	4.49	0.00253167	0.10953	0.00162256	0.000127193
CDIF630erm_00298	[gene=CD630DERM_01760]		2.04	1.82	2.45	4.13	0.00424497	0.114939	0.00317469	0.000147432
CDIF630erm_00299	[gene=CD630DERM_01770]	cfa	0.73	0.82	-0.38	-0.71	0.0345024	0.388496	9.47373e-05	0.000213122
CDIF630erm_00300	[gene=CD630DERM_01780]		-0.07	-0.1	0.21	0.2	0.170938	0.72535	0.000245188	0.000883876
CDIF630erm_00301	[gene=CD630DERM_01790]	gluD	1	3.04	1.15	0.64	0.0235228	0.0592962	0.61014	0.458464
CDIF630erm_00302	[gene=CD630DERM_01810]		0.03	-0.15	-0.39	-0.47	0.430801	0.468347	0.000141028	4.36574e-05
CDIF630erm_00303	[gene=CD630DERM_01811]		0	-0.03	-0.21	-0.28	0.581838	0.885342	0.00342317	0.000395769
	[gene=CD630DERM_01820]		-0.1	-0.11	-0.19	-0.21	0.0147216	0.437239	0.00543576	0.00187807
CDIF630erm_00304	[gene=CD630DERM_01830]		-0.13	-0.68	-0.47	-0.38	0.0172148	0.138002	0.00012991	0.000139544
CDIF630erm_00305	[gene=CD630DERM_01840]	pyrB	0.1	-0.05	0.04	0.23	0.243677	0.790602	0.319451	0.0100973
CDIF630erm_00306	[gene=CD630DERM_01850]	pyrK	0	-0.23	0.85	0.37	0.54531	0.228742	0.000106117	0.00221439
CDIF630erm_00307	[gene=CD630DERM_01860]	pyrD	0.06	0.04	0.34	0.37	0.541076	0.642506	0.810825	0.00119193
CDIF630erm_00308	[gene=CD630DERM_01870]	pyrE	0.08	-0.37	-0.2	-0.43	0.855922	0.158145	0.000128274	0.000366816
CDIF630erm_00309	[gene=CD630DERM_01880]		0.31	0.3	-0.46	-0.32	0.00432009	0.374429	9.4897e-05	0.000951644
CDIF630erm_00310	[gene=CD630DERM_01890]		-0.43	-0.4	-0.11	-0.1	0.00086753	0.162781	0.43543	0.135388
CDIF630erm_00311	[gene=CD630DERM_01900]		-0.11	0.18	0.47	0.39	0.0185658	0.491421	7.11495e-05	0.000183384
CDIF630erm_00312	[gene=CD630DERM_01910]		1.11	0.07	-0.08	1.41	0.00261308	0.708777	0.00292963	9.41809e-05
CDIF630erm_00313	[gene=CD630DERM_01920]	cls1	1.11	-0.25	-0.52	1.03	0.00235349	0.382474	0.00070873	0.000433238
CDIF630erm_00314	[gene=CD630DERM_01930]	groS	1.27	1.02	1.47	2.61	0.00465894	0.0910415	0.00384401	0.000129527
CDIF630erm_00315	[gene=CD630DERM_01940]	groL	1.14	1.7	1.77	2.85	0.0148718	0.0471549	0.00364819	0.000246441
CDIF630erm_00316	[gene=CD630DERM_01950]	larB	0.19	0.27	0.53	0.21	0.00521308	0.181817	0.00539811	0.000749831
CDIF630erm_00320	[gene=CD630DERM_01980]	guaA	-0.17	0	1.02	0.13	0.00262451	0.135211	0.23599	0.00496736
	[gene=CD630DERM_01981]		-0.44	-0.42	-0.14	-0.52	0.000804955	0.0721691	0.00103939	0.000161223
CDIF630erm_00321	[gene=CD630DERM_01990]		0.01	0.2	0.02	-0.46	0.816539	0.437239	0.449597	0.000964953
CDIF630erm_00323	[gene=CD630DERM_02010]		0.12	0.5	1.27	1.07	0.01512	0.146143	6.54438e-06	1.53551e-05
CDIF630erm_00324	[gene=CD630DERM_02020]		-0.11	-0.09	-0.08	-0.16	0.00990496	0.713498	0.716221	0.0230418
CDIF630erm_00325	[gene=CD630DERM_02030]		-0.01	0.09	0.32	0.22	0.879819	0.374292	7.15148e-05	0.000110007
CDIF630erm_00326	[gene=CD630DERM_02040]		0.15	0.07	-0.03	-0.14	0.00374148	0.751358	0.202823	0.00962836
CDIF630erm_00327	[gene=CD630DERM_02050]		0.01	0.34	1.05	0.6	0.545036	0.192247	1.57021e-05	9.73294e-05
CDIF630erm_00328	[gene=CD630DERM_02060]		-0.06	-0.03	0.24	0.14	0.0343404	0.804346	0.000100894	0.000547906
CDIF630erm_00329	[gene=CD630DERM_02070]		0.06	0.16	0.24	0.25	0.0317397	0.238957	0.000128629	0.000778456
CDIF630erm_00330	[gene=CD630DERM_02080]		-0.07	0.01	0.16	0.09	0.0237669	0.737333	0.00189018	0.0137719
CDIF630erm_00331	[gene=CD630DERM_02090]		-0.03	0.14	0.66	0.45	0.593417	0.351254	2.08285e-05	0.000104725
CDIF630erm_00332	[gene=CD630DERM_02100]		-0.39	-0.5	-0.51	-0.66	0.00118769	0.0555163	3.37667e-05	2.46579e-05
CDIF630erm_00333	[gene=CD630DERM_02110]		-0.33	-0.3	-0.26	-0.39	0.00828203	0.168225	0.00988625	8.9034e-05
CDIF630erm_00334	[gene=CD630DERM_02120]		-0.37	-0.43	-0.35	-0.47	0.00447378	0.0906047	0.000898916	0.000174783
CDIF630erm_00335	[gene=CD630DERM_02130]		0.03	0.14	0.3	0.21	0.151036	0.244879	3.63716e-05	9.31572e-05
CDIF630erm_00336	[gene=CD630DERM_02140]		0	0.06	0.15	0.07	0.482501	0.427445	0.00116203	0.00288535
CDIF630erm_00337	[gene=CD630DERM_02150]		-0.02	-0.18	-0.21	-0.18	0.710036	0.31775	0.0083671	0.00207119
CDIF630erm_00338	[gene=CD630DERM_02160]		-0.07	-0.21	-0.18	0.03	0.1831	0.280414	0.0508942	0.0404067
CDIF630erm_00339	[gene=CD630DERM_02170]		-0.16	-0.05	0	-0.12	0.00971943	0.895257	0.0478234	0.0704271
CDIF630erm_00340	[gene=CD630DERM_02180]	purE	-1.51	-0.92	0.9	-0.4	0.000681076	0.026403	0.00355223	1.27914e-05
CDIF630erm_00341	[gene=CD630DERM_02190]	purC2	-1.73	-1.98	-1.57	-2.76	0.000677874	0.026068	4.00028e-06	3.93139e-06
CDIF630erm_00342	[gene=CD630DERM_02200]	purF	-1.75	-1.8	-1.2	-2.44	0.00060789	0.0240707	7.92612e-06	4.8266e-06
CDIF630erm_00343	[gene=CD630DERM_02210]	purG	-1.81	-2.07	-1.82	-3.02	0.000558032	0.026403	3.68808e-06	3.93139e-06
CDIF630erm_00344	[gene=CD630DERM_02220]	purN	-1.73	-2.03	-1.76	-2.9	0.000601299	0.026403	3.96213e-06	3.93139e-06
CDIF630erm_00345	[gene=CD630DERM_02230]	purH	-1.69	-1.71	-1.14	-2.19	0.000539199	0.0171051	4.7372e-06	3.93139e-06
CDIF630erm_00346	[gene=CD630DERM_02240]	purD	-1.6	-1.51	-0.52	-1.81	0.00060789	0.0205633	1.47593e-05	5.91423e-06
CDIF630erm_00347	[gene=CD630DERM_02250]	purL	-1.52	-1.43	-0.76	-2.03	0.000656598	0.018376	7.85433e-06	5.40512e-06
CDIF630erm_00348	[gene=CD630DERM_02260]		-0.24	-0.24	0.05	-0.18	0.0255697	0.287287	0.210644	0.000705984
CDIF630erm_00349	[gene=CD630DERM_02270]		-0.19	-0.05	0.45	0.23	0.0103144	0.394755	0.262549	0.00742214
CDIF630erm_00350	[gene=CD630DERM_02280]	fliN1	-0.36	-0.68	-0.93	-0.96	0.00424497	0.0721691	4.86307e-05	1.05974e-05
CDIF630erm_00351	[gene=CD630DERM_02290]	flgM	-0.31	-0.41	-0.37	-0.5	0.0272745	0.0900066	0.00060679	0.000132086
CDIF630erm_00352	[gene=CD630DERM_02300]		-0.3	-0.4	-0.55	-0.59	0.0141403	0.109859	0.000238039	4.44846e-05
CDIF630erm_00353	[gene=CD630DERM_02310]	flgK	-0.34	-0.21	-0.11	-0.31	0.0299568	0.482902	0.111084	7.73027e-05
CDIF630erm_00354	[gene=CD630DERM_02320]	flgL	-0.34	-0.26	-0.36	-0.54	0.0314506	0.264117	6.92756e-05	2.51954e-05
CDIF630erm_00355	[gene=CD630DERM_02330]	fliW	-0.36	-0.39	-0.34	-0.53	0.0218321	0.133603	0.000384247	3.33234e-05
CDIF630erm_00356	[gene=CD630DERM_02340]	csrA	-0.3	0.05	-0.12	-0.93	0.0099791	0.886013	0.31244	6.42071e-06
CDIF630erm_00357	[gene=CD630DERM_02350]	fliS1	-0.42	-0.48	-0.48	-0.86	0.0161436	0.105302	4.39289e-05	1.18878e-05
CDIF630erm_00358	[gene=CD630DERM_02360]	fliS2	-0.41	-0.5	-0.75	-0.93	0.0207445	0.106168	1.31678e-05	1.05709e-05
CDIF630erm_00359	[gene=CD630DERM_02370]	fliD	-0.33	-0.24	-0.26	-0.57	0.0309982	0.265152	0.000166963	1.30723e-05
CDIF630erm_00360	[gene=CD630DERM_02380]	fliT	-0.41	-0.38	-0.84	-0.96	0.00960726	0.237455	9.56676e-06	5.53847e-06
CDIF630erm_00361	[gene=CD630DERM_02390]	fliC	-0.4	0.18	-0.7	-1.67	0.0238489	0.434977	2.05143e-05	8.76959e-06
CDIF630erm_00362	[gene=CD630DERM_02400]		-0.58	-0.54	-0.54	-0.67	0.00124011	0.0594494	3.02553e-05	2.51954e-05
CDIF630erm_00363	[gene=CD630DERM_02410]		-0.56	-0.39	-0.42	-0.72	0.00256213	0.10689	6.5735e-05	1.38758e-05
CDIF630erm_00364	[gene=CD630DERM_02420]		-0.49	-0.04	0.8	0.12	0.00678236	0.729188	0.00154156	0.0017502
CDIF630erm_00365	[gene=CD630DERM_02430]		-0.61	-0.63	-0.49	-0.62	0.0037147	0.0616731	2.15527e-05	1.19881e-05
CDIF630erm_00366	[gene=CD630DERM_02440]		-0.58	-0.59	-0.41	-0.65	0.00505353	0.0500768	0.000140387	1.27914e-05
CDIF630erm_00368	[gene=CD630DERM_02450]	flgB	-0.65	-0.57	-0.3	-0.39	0.00204782	0.0591466	0.000142283	4.13888e-05
CDIF630erm_00369	[gene=CD630DERM_02460]	flgC	-0.65	-0.46	-0.02	-0.42	0.00195352	0.0941984	0.107761	0.000828637
CDIF630erm_00370	[gene=CD630DERM_02470]	fliE	-0.76	-0.83	-0.89	-1	0.00142163	0.050883	1.45128e-05	9.63249e-06
CDIF630erm_00371	[gene=CD630DERM_02480]	fliF	-0.58	0.02	0.87	0.26	0.00218013	0.524	0.000912606	0.220914
CDIF630erm_00372	[gene=CD630DERM_02490]	fliG	-0.92	-0.69	-0.3	-0.67	0.000878646	0.0445367	0.000222409	1.30712e-05
CDIF630erm_00373	[gene=CD630DERM_02500]	fliH	-1.18	-1.2	-1.25	-1.37	0.00082627	0.046597	4.29069e-06	3.93139e-06
CDIF630erm_00374	[gene=CD630DERM_02510]	fliI	-0.91	-0.41	0.41	0.01	0.000656598	0.312543	0.0208463	0.0144898
CDIF630erm_00375	[gene=CD630DERM_02520]	fliJ	-1.11	-1.08	-1.15	-1.29	0.000493173	0.0322759	8.88656e-06	3.93139e-06
CDIF630erm_00376	[gene=CD630DERM_02530]	fliK	-1.04	-0.91	-0.8	-0.93	0.000424463	0.0370572	1.05638e-05	8.89451e-06
CDIF630erm_00377	[gene=CD630DERM_02540]	flgD	-0.55	0.38	1.63	0.73	0.000543567	0.957352	0.000230436	0.000829029
CDIF630erm_00378	[gene=CD630DERM_02550]	flgE	-0.68	0.03	0.99	0.2	0.00086753	0.983439	0.00463356	0.00179611
CDIF630erm_00379	[gene=CD630DERM_02551]	flbD	-0.86	-0.87	-0.96	-1.05	0.00060789	0.0298726	1.58565e-05	4.67241e-06
CDIF630erm_00380	[gene=CD630DERM_02560]	motA	-0.66	-0.11	1	0.44	0.00166576	0.595357	0.0041828	0.511805
CDIF630erm_00381	[gene=CD630DERM_02570]	motB	-0.6	-0.14	0.35	0.13	0.00172907	0.741699	0.0113588	0.286395
CDIF630erm_00382	[gene=CD630DERM_02580]	fliL	-0.64	-0.31	0.73	-0.12	0.000985003	0.267794	0.00080954	0.0564026
CDIF630erm_00383	[gene=CD630DERM_02590]	fliZ	-0.35	-0.39	-0.46	-0.55	0.000674721	0.0891322	0.000137375	2.45205e-05
CDIF630erm_00384	[gene=CD630DERM_02600]	fliP	-0.37	0.06	1.06	0.43	0.00271568	0.825187	2.89937e-05	0.0142252
CDIF630erm_00385	[gene=CD630DERM_02610]	fliQ	-0.44	-0.35	-0.21	-0.37	0.0020225	0.225252	0.063473	0.000242959
CDIF630erm_00386	[gene=CD630DERM_02620]	flhB	-0.3	-0.02	1	0.61	0.00531623	0.728574	8.94626e-05	0.000714663
CDIF630erm_00387	[gene=CD630DERM_02630]	flhA	-0.4	-0.41	0.06	-0.34	0.00196848	0.0904496	0.751343	0.000339064
CDIF630erm_00388	[gene=CD630DERM_02640]	flhF	-0.38	-0.4	-0.24	-0.49	0.00135162	0.0902508	0.00180637	8.20414e-05
CDIF630erm_00389	[gene=CD630DERM_02650]	flhG	-0.31	-0.36	-0.02	-0.38	0.00278412	0.143412	0.459265	0.000131806
CDIF630erm_00390	[gene=CD630DERM_02660]	fliA	-0.34	-0.38	0.13	0	0.00188155	0.098513	0.562942	0.0300254
CDIF630erm_00391	[gene=CD630DERM_02670]		-0.37	-0.54	-0.29	-0.49	0.00171024	0.0515169	0.000599692	6.14725e-05
	[gene=CD630DERM_02671]		-0.26	-0.32	-0.38	-0.34	0.00238998	0.121057	0.000701086	0.000251545
CDIF630erm_00392	[gene=CD630DERM_02680]	flgG1	-0.29	-0.45	-0.26	-0.5	0.00780601	0.0879642	0.00136501	1.54086e-05
CDIF630erm_00393	[gene=CD630DERM_02690]	flgG2	-0.28	-0.14	0.32	-0.02	0.00857494	0.902479	0.00145855	0.16573
CDIF630erm_00394	[gene=CD630DERM_02700]	fliM	-0.19	-0.21	0.03	-0.03	0.0281825	0.315122	0.603937	0.0832254
CDIF630erm_00395	[gene=CD630DERM_02710]	fliN2	-0.3	-0.63	-0.76	-0.93	0.01834	0.0799336	2.87264e-05	1.71167e-05
CDIF630erm_00396	[gene=CD630DERM_02720]		-0.19	-0.3	-0.29	-0.36	0.0410159	0.19866	0.000664521	0.000313113
CDIF630erm_00397	[gene=CD630DERM_02730]	htpG	0.29	-0.15	-0.27	-0.38	0.0145498	0.364532	0.000257368	3.10044e-05
	[gene=CD630DERM_02731]		0.07	-0.1	-0.49	-0.46	0.0669671	0.463945	3.93729e-05	3.38591e-05
CDIF630erm_00398	[gene=CD630DERM_02740]		0.18	-0.06	-0.18	-0.28	0.165219	0.517903	0.00320754	0.000793036
CDIF630erm_00399	[gene=CD630DERM_02750]	splB	0.14	0.35	0.9	0.47	0.174367	0.209614	7.16139e-05	0.00181199
CDIF630erm_00400	[gene=CD630DERM_02760]		0.01	0.62	1.45	0.87	0.871001	0.20476	6.97908e-06	3.35463e-05
CDIF630erm_00401	[gene=CD630DERM_02770]		-0.09	-0.13	-0.13	-0.22	0.0152634	0.378239	0.112608	0.00246604
CDIF630erm_00402	[gene=CD630DERM_02780]		0.18	0.19	0.19	0.41	0.00448969	0.18822	0.000105252	2.00267e-05
CDIF630erm_00403	[gene=CD630DERM_02790]		2.61	3.77	-0.09	0.49	0.000430793	0.020595	0.49406	0.00355096
CDIF630erm_00404	[gene=CD630DERM_02791]		0.38	0.41	-0.2	-0.12	0.00478222	0.173365	0.0081725	0.0136159
CDIF630erm_00405	[gene=CD630DERM_02810]		-0.13	-0.12	-0.16	-0.09	0.205171	0.464627	0.208742	0.694364
CDIF630erm_00406	[gene=CD630DERM_02820]		-0.01	0.26	0.38	1.08	0.992448	0.326886	0.00143476	0.000845398
CDIF630erm_00407	[gene=CD630DERM_02830]		-0.07	-0.03	0.1	0.14	0.500772	0.985944	0.0275987	0.00392726
CDIF630erm_00408	[gene=CD630DERM_02840]		-0.19	0.39	-0.51	-0.76	0.932429	0.954314	0.354792	0.318333
CDIF630erm_00409	[gene=CD630DERM_02850]		-0.36	0.32	-0.58	-0.85	0.959932	0.930534	0.204936	0.21426
CDIF630erm_00410	[gene=CD630DERM_02860]		-0.35	0.36	-0.57	-0.88	0.938198	0.952441	0.200691	0.180326
CDIF630erm_00411	[gene=CD630DERM_02870]		-0.29	0.56	-0.3	-0.61	0.959932	0.836011	0.713399	0.465447
CDIF630erm_00412	[gene=CD630DERM_02880]		-0.16	0.97	1.07	0.58	0.982309	0.453557	0.306767	0.515844
CDIF630erm_00413	[gene=CD630DERM_02890]		-0.15	0.82	-0.48	-0.85	0.96588	0.561755	0.412518	0.276805
CDIF630erm_00414	[gene=CD630DERM_02900]		-0.2	0.76	-1.07	-1.19	0.995982	0.758291	0.0714933	0.121066
CDIF630erm_00415	[gene=CD630DERM_02910]		-0.4	0.3	0.04	0.01	0.694266	0.55668	0.636178	0.701494
CDIF630erm_00416	[gene=CD630DERM_02920]		-0.05	0.25	1.31	0.84	0.170729	0.238152	1.00025e-05	1.58263e-05
CDIF630erm_00417	[gene=CD630DERM_02921]		-0.11	-0.06	0.01	0.02	0.00433568	0.856021	0.0163061	0.00489328
CDIF630erm_00418	[gene=CD630DERM_02930]		-0.07	0.02	0.29	0.52	0.0832305	0.545811	0.000278164	1.97222e-05
CDIF630erm_00419	[gene=CD630DERM_02940]		0.03	0.1	0.23	0.18	0.0449313	0.303265	0.00010574	0.000149024
CDIF630erm_00420	[gene=CD630DERM_02950]		0.65	0.58	0.51	0.33	0.00140721	0.0839272	0.000310471	0.0193952
CDIF630erm_00421	[gene=CD630DERM_02960]		0.5	0.35	-0.49	-0.24	0.00147712	0.409111	8.45906e-05	0.00133699
CDIF630erm_00422	[gene=CD630DERM_02970]	bioB1	-0.05	0.5	0.93	0.96	0.201616	0.238819	2.25007e-05	9.73294e-05
CDIF630erm_00423	[gene=CD630DERM_02980]	rbsR	0.17	0.03	0.14	0.48	0.201616	0.524076	0.00256634	8.04552e-05
CDIF630erm_00424	[gene=CD630DERM_02990]	rbsK	0.1	1.33	3.45	2.46	0.448594	0.194944	4.29069e-06	4.93289e-06
CDIF630erm_00425	[gene=CD630DERM_03000]	rbsB1	0.19	0.27	0.63	0.92	0.0064947	0.12935	2.70429e-05	8.77177e-06
CDIF630erm_00426	[gene=CD630DERM_03010]	rbsA1	0.03	0.09	0.19	0.59	0.305353	0.377906	0.000354518	1.58263e-05
CDIF630erm_00427	[gene=CD630DERM_03020]	rbsC2	0.17	0.68	1.99	1.52	0.00617665	0.217447	4.00028e-06	2.06298e-05
CDIF630erm_00428	[gene=CD630DERM_03030]	argE	-0.05	0.02	0.17	0.52	0.345657	0.66551	0.00403736	7.80931e-05
CDIF630erm_00429	[gene=CD630DERM_03040]		0.09	0.21	0.29	0.56	0.0343313	0.219516	0.000262725	5.23146e-05
CDIF630erm_00430	[gene=CD630DERM_03050]		0.15	0.1	0.2	0.24	0.00165148	0.26992	9.95463e-05	4.19866e-05
CDIF630erm_00431	[gene=CD630DERM_03060]		-0.19	-0.4	-0.57	-0.59	0.018553	0.190259	2.47095e-05	3.89721e-05
CDIF630erm_00432	[gene=CD630DERM_03070]		-0.05	-0.2	-0.64	-0.46	0.0838918	0.315772	2.40187e-05	7.40151e-05
CDIF630erm_00433	[gene=CD630DERM_03080]		-0.08	-0.28	-0.67	-0.65	0.0323937	0.296241	0.000112311	2.31215e-05
CDIF630erm_00434	[gene=CD630DERM_03090]		-0.13	-0.3	-0.4	-0.06	0.00721912	0.214779	0.000486066	0.141916
CDIF630erm_00435	[gene=CD630DERM_03100]		-0.23	-0.26	-0.18	-0.33	0.00199037	0.201162	0.0032076	4.62166e-05
CDIF630erm_00436	[gene=CD630DERM_03110]		0.09	0.23	0.55	0.53	0.0155281	0.247751	2.12381e-05	1.18878e-05
CDIF630erm_00437	[gene=CD630DERM_03120]		0.38	0.23	0.18	0.29	0.000741711	0.119923	0.000256444	0.00215263
CDIF630erm_00438	[gene=CD630DERM_03130]		0.6	0.34	0.27	0.76	0.000681076	0.140239	4.52887e-05	0.00330061
CDIF630erm_00442	[gene=CD630DERM_03140]		-0.41	-0.21	0.29	0.06	0.000879161	0.500248	0.00285748	0.0219866
	[gene=CD630DERM_03150]		-0.28	-0.37	-0.04	-0.14	0.000617998	0.259639	0.138439	0.0317931
CDIF630erm_00443	[gene=CD630DERM_03160]		0.12	0.41	0.67	0.68	0.043464	0.231981	0.000257885	2.88116e-05
CDIF630erm_00444	[gene=CD630DERM_03170]		0.04	0.05	0.14	0.22	0.267641	0.411065	0.00179747	0.000223201
CDIF630erm_00445	[gene=CD630DERM_03180]		0.01	-0.03	0.35	0.56	0.739299	0.680256	0.00152272	2.27749e-05
	[gene=CD630DERM_03181]		0.01	-0.27	-0.24	-0.23	0.543585	0.173365	0.0206985	0.00718215
CDIF630erm_00446	[gene=CD630DERM_03190]		0.1	0.08	0.36	0.36	0.0343384	0.354181	4.48709e-05	2.44043e-05
CDIF630erm_00447	[gene=CD630DERM_03200]		0.13	0.09	0.4	0.38	0.0231042	0.344179	2.79021e-05	2.39095e-05
CDIF630erm_00448	[gene=CD630DERM_03210]		-0.01	-0.23	-0.25	-0.11	0.820275	0.247935	0.0107339	0.0676708
CDIF630erm_00449	[gene=CD630DERM_03220]		0.05	-0.09	-0.07	0	0.058557	0.849909	0.475893	0.34869
CDIF630erm_00450	[gene=CD630DERM_03230]		0.01	0.38	1.86	1.33	0.88645	0.253693	5.11067e-06	5.30465e-05
CDIF630erm_00452	[gene=CD630DERM_03240]	cbiM	1.06	1.66	0.96	1.46	0.000681076	0.0720509	0.832754	0.00035451
CDIF630erm_00453	[gene=CD630DERM_03250]	cbiN	1.02	1.55	0.71	1.09	0.000879161	0.0712033	0.463494	0.000801877
CDIF630erm_00454	[gene=CD630DERM_03260]	cbiQ1	0.91	0.8	0.12	0.75	0.00330495	0.691442	0.0224895	0.0167948
CDIF630erm_00455	[gene=CD630DERM_03270]	cbiO	0.89	0.59	0.03	0.44	0.00111412	0.987482	0.00987907	0.867849
CDIF630erm_00456	[gene=CD630DERM_03280]	pcrA	0.03	0.08	-0.06	-0.03	0.675537	0.830795	0.0116014	0.0892091
CDIF630erm_00457	[gene=CD630DERM_03290]	apeB	0.16	0.08	-0.12	-0.22	0.103872	0.916987	0.000659376	0.000405096
CDIF630erm_00458	[gene=CD630DERM_03300]		0.17	0.26	0.1	-0.01	0.115931	0.879903	0.00226582	0.000359789
CDIF630erm_00459	[gene=CD630DERM_03310]	ppiB	0.13	0.15	0.07	-0.31	0.479516	0.594275	0.00240115	4.335e-05
CDIF630erm_00460	[gene=CD630DERM_03320]	bclA1	-0.02	0.6	1.1	1.15	0.869507	0.173702	3.93729e-05	1.8667e-05
CDIF630erm_00461	[gene=CD630DERM_03330]		0	-0.31	-0.37	-0.44	0.0427501	0.195802	2.34596e-05	0.00016232
CDIF630erm_00462	[gene=CD630DERM_03340]	adhE1	0.12	0.22	0.43	0.33	0.00647978	0.165376	1.98282e-05	5.25176e-05
CDIF630erm_00463	[gene=CD630DERM_03350]		-0.04	-0.13	-0.22	-0.28	0.2232	0.387018	0.00534446	0.000244348
CDIF630erm_00464	[gene=CD630DERM_03360]		0.14	0.15	0	0.04	0.0223036	0.236487	0.112428	0.0108068
CDIF630erm_00465	[gene=CD630DERM_03370]		0.02	0.03	0.34	0.18	0.0997246	0.529204	0.000165699	0.000200126
CDIF630erm_00466	[gene=CD630DERM_03380]		-0.05	-0.14	-0.03	0.19	0.173585	0.632022	0.0717087	0.00072946
CDIF630erm_00467	[gene=CD630DERM_03390]		-0.12	-0.13	-0.14	-0.19	0.0148391	0.456108	0.198122	0.00165625
CDIF630erm_00468	[gene=CD630DERM_03400]		-0.13	0.07	1.31	0.88	0.0279456	0.569294	1.14377e-05	0.000351944
CDIF630erm_00469	[gene=CD630DERM_03410]		-0.22	-0.32	-0.27	-0.07	0.00615366	0.213407	0.000916403	0.0362363
CDIF630erm_00470	[gene=CD630DERM_03420]		-0.47	-0.61	-0.78	-0.87	0.00124452	0.0592232	2.59417e-05	5.90577e-06
CDIF630erm_00471	[gene=CD630DERM_03430]		-0.22	-0.38	-0.31	-0.39	0.0138709	0.093894	0.00115494	4.61382e-05
CDIF630erm_00472	[gene=CD630DERM_03440]		-0.14	0.02	0.6	0.13	0.0134065	0.930534	0.00322068	0.719561
CDIF630erm_00473	[gene=CD630DERM_03450]	yjbM	0	-0.03	0.04	-0.16	0.68023	0.957352	0.235322	0.000420535
CDIF630erm_00474	[gene=CD630DERM_03460]		-0.27	-0.07	0.84	0.71	0.00894028	0.526667	0.00128689	0.00832677
CDIF630erm_00475	[gene=CD630DERM_03470]		-0.21	-0.35	-0.34	-0.43	0.0255668	0.144365	0.00122023	3.50568e-05
CDIF630erm_00478	[gene=CD630DERM_03500]		0.69	0.2	0	1.26	0.00649248	0.756618	0.0900093	5.24991e-05
CDIF630erm_00479	[gene=CD630DERM_03510]		0.68	0.02	-0.19	0.86	0.00166576	0.580221	0.000810559	0.000471957
CDIF630erm_00480	[gene=CD630DERM_03520]		0.09	0.15	0.2	0.24	0.0138942	0.233076	0.000126687	7.45085e-05
CDIF630erm_00481	[gene=CD630DERM_03530]		0.18	0.08	0.03	0.1	0.0060227	0.511585	0.00567358	0.00693042
CDIF630erm_00482	[gene=CD630DERM_03541]		0.24	-0.03	-0.29	-0.14	0.00171058	0.873896	0.00555258	0.119564
CDIF630erm_00483	[gene=CD630DERM_03550]	int1	0.24	0.27	0.22	0.88	0.198016	0.60848	0.0270534	0.000376981
CDIF630erm_00484	[gene=CD630DERM_03560]	xis1	0.1	0.34	0.42	0.21	0.025649	0.12935	5.72782e-05	0.00312145
CDIF630erm_00485	[gene=CD630DERM_03580]		0.06	0.29	0.16	0.19	0.0265444	0.153241	0.000220157	0.000108346
CDIF630erm_00486	[gene=CD630DERM_03590]		0.17	0.26	0.2	0.18	0.00285064	0.14028	0.000494809	0.000169607
CDIF630erm_00487	[gene=CD630DERM_03600]		-0.03	0.01	0.05	0.07	0.516452	0.718273	0.0148973	0.000800193
CDIF630erm_00488	[gene=CD630DERM_03610]		-0.02	0.05	0.2	0.15	0.901279	0.451914	0.000209563	0.0013688
CDIF630erm_00489	[gene=CD630DERM_03620]		-0.01	0.1	0.25	0.15	0.662372	0.326886	0.000141967	0.000243441
CDIF630erm_00490	[gene=CD630DERM_03630]		0.1	-0.06	0.19	0.19	0.00456365	0.764934	0.00100415	5.24991e-05
CDIF630erm_00491	[gene=CD630DERM_03640]		0.11	0.23	0.49	0.43	0.00316942	0.173466	1.32077e-05	2.69545e-05
CDIF630erm_00492	[gene=CD630DERM_03650]		0.05	0.16	0.14	0.05	0.0803618	0.226286	0.000654886	0.00725853
CDIF630erm_00493	[gene=CD630DERM_03660]		-0.03	-0.1	-0.22	-0.07	0.66514	0.660566	0.00361442	0.503528
CDIF630erm_00494	[gene=CD630DERM_03670]		-0.02	-0.08	-0.02	-0.08	0.982582	0.849306	0.156804	0.235714
CDIF630erm_00495	[gene=CD630DERM_03680]		-0.01	-0.24	-0.21	-0.22	0.76288	0.251237	0.00404632	0.00237925
CDIF630erm_00496	[gene=CD630DERM_03690]		0.03	-0.17	-0.09	-0.12	0.229158	0.438037	0.872952	0.122225
CDIF630erm_00497	[gene=CD630DERM_03700]		-0.02	-0.14	-0.28	-0.25	0.676452	0.471448	0.00563043	0.00102809
CDIF630erm_00498	[gene=CD630DERM_03710]		-0.01	0.15	0.59	0.51	0.434517	0.344109	1.34588e-05	1.30723e-05
CDIF630erm_00499	[gene=CD630DERM_03720]		0.14	0.13	0.67	0.6	0.00329475	0.359117	2.6355e-05	1.5665e-05
CDIF630erm_00500	[gene=CD630DERM_03730]		0.13	0.28	0.49	0.44	0.00352891	0.168225	1.82923e-05	1.47179e-05
CDIF630erm_00501	[gene=CD630DERM_03740]		0.11	0.3	0.66	0.57	0.0138942	0.158629	2.26853e-05	1.44317e-05
CDIF630erm_00502	[gene=CD630DERM_03750]		0.17	0.17	0.49	0.54	0.00127494	0.228964	9.42701e-06	1.05701e-05
CDIF630erm_00503	[gene=CD630DERM_03760]		0.17	0.79	1.34	0.79	0.00349942	0.158629	1.92028e-05	3.33234e-05
CDIF630erm_00504	[gene=CD630DERM_03770]		0.12	0.27	0.47	0.38	0.00445791	0.176362	1.40455e-05	2.26715e-05
CDIF630erm_00505	[gene=CD630DERM_03780]		0.12	0.74	1.36	0.89	0.00386714	0.148697	2.87498e-05	1.30723e-05
CDIF630erm_00506	[gene=CD630DERM_03790]		0.14	0.4	0.68	0.77	0.0163842	0.125421	2.07548e-05	1.27914e-05
CDIF630erm_00507	[gene=CD630DERM_03800]		0.07	0.12	-0.03	0.03	0.016198	0.358011	0.761267	0.0167948
CDIF630erm_00508	[gene=CD630DERM_03810]		0.06	0.06	0.55	0.47	0.0174253	0.446708	1.07248e-05	3.10462e-05
CDIF630erm_00509	[gene=CD630DERM_03820]		0.08	0.12	0.48	0.29	0.00748621	0.272842	1.79002e-05	3.82164e-05
CDIF630erm_00510	[gene=CD630DERM_03830]		0.25	0.56	0.62	0.59	0.000715676	0.12194	8.88656e-06	1.09768e-05
CDIF630erm_00511	[gene=CD630DERM_03840]		0.07	0.24	0.26	0.36	0.0183214	0.174935	0.0029852	3.93259e-05
CDIF630erm_00512	[gene=CD630DERM_03850]		0.07	0.2	0.4	0.29	0.0191898	0.193352	1.92196e-05	2.78095e-05
	[gene=CD630DERM_03851]		0.31	1.45	2.86	1.87	0.00113555	0.121057	4.7372e-06	5.19276e-06
CDIF630erm_00513	[gene=CD630DERM_03860]		0.07	0.31	0.31	0.32	0.0129081	0.158145	4.94667e-05	3.8285e-05
CDIF630erm_00514	[gene=CD630DERM_03870]		0.09	0.16	0.26	0.32	0.129605	0.240657	0.00400395	3.89234e-05
CDIF630erm_00515	[gene=CD630DERM_03880]	bglF	0.1	0.15	0.61	0.63	0.0707617	0.369082	0.000207822	5.04293e-05
CDIF630erm_00516	[gene=CD630DERM_03890]	bglA1	0.03	-0.04	-0.19	-0.11	0.230792	0.849105	0.0300048	0.209939
CDIF630erm_00518	[gene=CD630DERM_03901]		-0.28	-0.01	-0.14	-0.29	0.00951415	0.170088	0.097885	0.00123176
CDIF630erm_00519	[gene=CD630DERM_03910]	asnB1	0	-0.32	0.09	0.04	0.818311	0.85771	0.0166946	0.0359883
CDIF630erm_00520	[gene=CD630DERM_03920]		0.9	1.1	-0.14	-0.79	0.00540367	0.217447	4.32196e-05	2.29742e-05
CDIF630erm_00521	[gene=CD630DERM_03930]		0.89	0.95	-0.67	-1.38	0.00309253	0.334254	5.9541e-06	6.91452e-06
CDIF630erm_00522	[gene=CD630DERM_03940]	ldhA	0.31	1.32	0.22	-0.39	0.0129369	0.205452	0.00701859	0.00224146
CDIF630erm_00523	[gene=CD630DERM_03950]	hadA	-1.13	0.84	1.33	0.3	0.000459342	0.962275	0.384664	0.181225
CDIF630erm_00524	[gene=CD630DERM_03960]	hadI	-1.16	0.94	1.32	0.26	0.000430793	0.875161	0.372331	0.197065
CDIF630erm_00525	[gene=CD630DERM_03970]	hadB	-1.16	0.89	0.97	-0.04	0.000543567	0.875494	0.68833	0.0607636
CDIF630erm_00526	[gene=CD630DERM_03980]	hadC	-1.14	0.86	1.23	0.15	0.00060789	0.795169	0.116987	0.159054
CDIF630erm_00527	[gene=CD630DERM_03990]	acdB	-1.54	0.35	0.72	-0.3	0.000677874	0.220163	0.0113887	0.00942799
CDIF630erm_00528	[gene=CD630DERM_04000]	etfB1	-1.61	0.15	0.46	-0.68	0.000656598	0.124017	0.0061341	0.00413744
CDIF630erm_00529	[gene=CD630DERM_04010]	etfA1	-1.61	0.2	0.51	-0.63	0.000715676	0.130151	0.00496014	0.0055475
CDIF630erm_00530	[gene=CD630DERM_04020]		-0.09	-0.06	0.38	0.41	0.050124	0.495458	0.0243315	0.000750955
CDIF630erm_00531	[gene=CD630DERM_04030]	fba	0.54	1.3	-0.89	0.2	0.000677874	0.105302	4.12174e-05	0.0629974
CDIF630erm_00532	[gene=CD630DERM_04040]		-0.24	-0.51	-0.73	-0.7	0.00663815	0.104047	1.14854e-05	1.29007e-05
CDIF630erm_00533	[gene=CD630DERM_04050]		-0.19	-0.44	-0.17	-0.27	0.0139316	0.125924	0.0380045	0.000142822
CDIF630erm_00534	[gene=CD630DERM_04060]		-0.26	-0.37	0.08	-0.4	0.00428284	0.102749	0.016315	6.03872e-05
	[gene=CD630DERM_04080]		-0.21	0.21	0.42	0.77	0.00134875	0.545811	0.151218	0.000222075
CDIF630erm_00535	[gene=CD630DERM_04081]		-0.16	0.06	0.17	0.31	0.00928881	0.542387	0.0111864	0.000579855
CDIF630erm_00536	[gene=CD630DERM_04090]		-0.02	0.26	0.52	0.59	0.543422	0.181571	1.40448e-05	1.05709e-05
CDIF630erm_00537	[gene=CD630DERM_04100]		-0.12	0.05	0.16	0.24	0.012456	0.475681	0.00104285	0.000589242
CDIF630erm_00538	[gene=CD630DERM_04110]		0.04	0.24	0.32	0.43	0.204944	0.149678	0.000167947	2.54288e-05
CDIF630erm_00539	[gene=CD630DERM_04120]		-0.09	0.38	0.73	1.14	0.219595	0.167317	1.92196e-05	1.64075e-05
	[gene=CD630DERM_04121]		-0.08	0.13	0.02	-0.05	0.0834711	0.249031	0.00684549	0.223144
CDIF630erm_00540	[gene=CD630DERM_04130]		0.03	0.5	1.1	0.89	0.410604	0.1035	1.75324e-05	2.31215e-05
CDIF630erm_00541	[gene=CD630DERM_04140]		0.13	1.06	2.17	1.88	0.0341727	0.155878	5.04889e-06	1.06675e-05
CDIF630erm_00542	[gene=CD630DERM_04150]		0.14	0.52	0.56	0.49	0.0117352	0.106966	1.40448e-05	1.20547e-05
CDIF630erm_00543	[gene=CD630DERM_04160]		0.09	0.37	0.41	0.35	0.0110587	0.0990098	3.90227e-05	3.90207e-05
CDIF630erm_00544	[gene=CD630DERM_04170]		0.08	0.27	0.34	0.33	0.0188327	0.150063	2.63737e-05	2.31215e-05
CDIF630erm_00545	[gene=CD630DERM_04180]		0	0.32	0.31	0.62	0.770598	0.14514	6.9321e-05	1.52952e-05
CDIF630erm_00546	[gene=CD630DERM_04190]		0.08	0.85	1.39	1.41	0.0406685	0.1447	2.36137e-05	2.07018e-05
CDIF630erm_00547	[gene=CD630DERM_04191]		-0.05	0.05	0.04	0.11	0.487829	0.383219	0.0227466	0.000237826
CDIF630erm_00548	[gene=CD630DERM_04200]		0.09	0.77	2.25	1.59	0.032422	0.16276	4.84729e-06	2.26715e-05
CDIF630erm_00549	[gene=CD630DERM_04210]		0.01	0.08	0.33	0.25	0.212647	0.359117	2.47095e-05	5.04293e-05
CDIF630erm_00550	[gene=CD630DERM_04220]		0.61	0.58	-0.37	-0.71	0.00166576	0.205774	4.2711e-05	8.76959e-06
CDIF630erm_00551	[gene=CD630DERM_04230]		0	0.34	0.99	0.44	0.80582	0.19866	2.94234e-05	0.000198354
CDIF630erm_00552	[gene=CD630DERM_04240]		0.06	0.23	0.78	0.59	0.00518094	0.189152	2.08285e-05	2.70686e-05
CDIF630erm_00553	[gene=CD630DERM_04250]		0.07	0.15	0.26	0.18	0.0115543	0.212467	0.000103897	0.000108051
CDIF630erm_00554	[gene=CD630DERM_04260]		0.01	0.07	0.13	0.07	0.393897	0.463835	0.00110032	0.0014586
CDIF630erm_00555	[gene=CD630DERM_04270]		-0.04	-0.32	-0.48	-0.51	0.492289	0.191042	5.35229e-05	1.68925e-05
CDIF630erm_00556	[gene=CD630DERM_04280]		0.13	0.04	-0.16	-0.16	0.00933099	0.780551	0.191125	0.00123788
CDIF630erm_00557	[gene=CD630DERM_04290]		0.08	0.06	0.1	0.06	0.00716251	0.450159	0.00105174	0.00253234
CDIF630erm_00558	[gene=CD630DERM_04300]		0.06	0.01	0.19	0.18	0.010301	0.557456	7.37988e-05	0.000129286
CDIF630erm_00559	[gene=CD630DERM_04310]		0.04	0.12	0.32	0.12	0.0479333	0.270025	0.000178418	0.000252645
CDIF630erm_00560	[gene=CD630DERM_04320]		0.09	0.06	0.17	0.16	0.005013	0.370702	0.000787527	8.03806e-05
CDIF630erm_00561	[gene=CD630DERM_04330]		0	0.01	0.1	0	0.278108	0.728574	0.00207923	0.0142753
CDIF630erm_00562	[gene=CD630DERM_04340]		0.15	-0.02	0.23	0.21	0.00181582	0.584	0.000524423	9.07907e-05
	[gene=CD630DERM_04341]		-0.15	-0.08	-0.06	-0.11	0.00379022	0.876744	0.24434	0.0261486
CDIF630erm_00563	[gene=CD630DERM_04350]		-0.09	-0.02	0	0	0.0441501	0.783945	0.0194116	0.00862517
	[gene=CD630DERM_04351]		-0.06	-0.05	0.18	0.11	0.0253271	0.773254	0.000383997	0.000555611
CDIF630erm_00564	[gene=CD630DERM_04352]		-0.01	0.08	0.23	0.14	0.694434	0.383282	0.000437016	0.000215121
CDIF630erm_00565	[gene=CD630DERM_04360]		-0.33	-0.05	1.58	4.8	0.016274	0.719809	0.000393687	3.93139e-06
	[gene=CD630DERM_04371]		-0.07	0.04	0.09	0.17	0.0261161	0.560312	0.00295399	0.000356508
CDIF630erm_00566	[gene=CD630DERM_04380]		0	-0.14	-0.05	0.82	0.775814	0.719021	0.791003	2.80778e-05
CDIF630erm_00567	[gene=CD630DERM_04390]		0.13	-0.1	-0.09	0.79	0.0570639	0.431216	0.0657295	4.06859e-05
CDIF630erm_00568	[gene=CD630DERM_04400]	cwp27	0.21	0.08	-0.17	-0.23	0.0190258	0.580221	0.0345356	0.000872046
	[gene=CD630DERM_04401]		0.14	1.69	1.22	-0.15	0.930977	0.187223	0.00275137	0.125802
CDIF630erm_00569	[gene=CD630DERM_04410]		0	0.03	0.21	0.06	0.861845	0.478501	0.000346016	0.00392788
CDIF630erm_00570	[gene=CD630DERM_04420]	ord	-0.22	-0.17	-0.03	-0.07	0.000879161	0.369082	0.0568233	0.703208
CDIF630erm_00571	[gene=CD630DERM_04430]	ortA	0.07	0.13	0.23	0.19	0.0140422	0.238303	8.10745e-05	9.41809e-05
CDIF630erm_00572	[gene=CD630DERM_04440]	ortB	0.01	0.12	0.51	0.38	0.661338	0.293081	4.12174e-05	5.04293e-05
CDIF630erm_00573	[gene=CD630DERM_04450]	oraS	-0.19	0.03	0.61	0.45	0.00464181	0.620957	3.8809e-05	0.00023516
CDIF630erm_00574	[gene=CD630DERM_04460]	oraE	0	0.39	0.82	0.58	0.726323	0.293378	2.23936e-05	0.000140174
CDIF630erm_00575	[gene=CD630DERM_04470]		0.14	0.19	0.34	0.4	0.00179055	0.151793	8.16503e-05	0.000104135
CDIF630erm_00576	[gene=CD630DERM_04480]	orr	-0.09	0.02	0.23	0.14	0.0268705	0.620957	0.000207822	0.000254506
CDIF630erm_00577	[gene=CD630DERM_04490]		0.11	0.33	0.65	0.49	0.00404669	0.155878	4.86017e-05	2.97797e-05
CDIF630erm_00578	[gene=CD630DERM_04500]		0.06	0.52	1.25	0.88	0.178498	0.198026	1.57719e-05	3.4092e-05
CDIF630erm_00579	[gene=CD630DERM_04510]		0.06	-0.25	-0.5	-0.32	0.575944	0.298457	0.000154601	0.00167128
CDIF630erm_00580	[gene=CD630DERM_04520]		0.14	0.12	0.14	0.13	0.150018	0.937134	0.0760244	0.633391
CDIF630erm_00581	[gene=CD630DERM_04530]		0.21	0.35	0.07	0.06	0.0506078	0.192079	0.172315	0.255803
	[gene=CD630DERM_04532]		0.27	0.73	0.64	0.49	0.027646	0.11474	0.000295148	0.000564475
CDIF630erm_00582	[gene=CD630DERM_04540]		0.09	-0.03	-0.02	-0.09	0.114764	0.695239	0.126471	0.0199606
CDIF630erm_00583	[gene=CD630DERM_04550]		0.11	0.11	0.3	0.2	0.0448446	0.592396	0.0158053	0.0739937
CDIF630erm_00584	[gene=CD630DERM_04560]		0.1	0.4	0.7	0.82	0.0194507	0.15181	1.82923e-05	5.58454e-05
CDIF630erm_00585	[gene=CD630DERM_04570]		0.05	0.06	0.05	0.13	0.0135535	0.471297	0.137385	0.000202523
CDIF630erm_00586	[gene=CD630DERM_04580]		-0.16	0.04	0.43	0.59	0.0051547	0.587139	2.36137e-05	0.000104424
CDIF630erm_00587	[gene=CD630DERM_04590]		-0.11	0.06	0.33	0.1	0.00723837	0.453103	0.000257368	0.0150985
CDIF630erm_00588	[gene=CD630DERM_04600]		-0.03	0.15	0.78	0.72	0.770456	0.286149	1.84397e-05	3.31053e-05
CDIF630erm_00589	[gene=CD630DERM_04610]		-0.01	0.04	0.17	0.06	0.738023	0.554402	0.000602352	0.00200231
CDIF630erm_00590	[gene=CD630DERM_04620]		0.04	0.26	0.98	0.91	0.186998	0.26923	2.99808e-05	4.81043e-05
CDIF630erm_00591	[gene=CD630DERM_04630]		-0.01	-0.09	-0.04	-0.11	0.857121	0.705377	0.0753136	0.107475
CDIF630erm_00592	[gene=CD630DERM_04640]		-0.01	0.05	0.35	0.4	0.85619	0.470798	8.43941e-05	3.37625e-05
CDIF630erm_00593	[gene=CD630DERM_04650]		-0.07	-0.18	-0.34	-0.34	0.0710457	0.369128	0.000700795	0.000129233
CDIF630erm_00594	[gene=CD630DERM_04660]		-0.05	-0.21	-0.41	-0.38	0.164999	0.31435	9.08159e-05	0.000231142
CDIF630erm_00595	[gene=CD630DERM_04670]		0.1	0.44	0.86	0.75	0.00285096	0.146143	6.16837e-05	1.20185e-05
CDIF630erm_00596	[gene=CD630DERM_04680]		-0.01	0.09	0.64	0.14	0.901279	0.383239	0.000118993	0.000314444
CDIF630erm_00597	[gene=CD630DERM_04690]		0	0.1	0.27	0.22	0.56047	0.360071	7.40751e-05	4.89819e-05
CDIF630erm_00598	[gene=CD630DERM_04700]	blaR	0.01	0.01	0.08	0.02	0.25125	0.577008	0.00831161	0.0112046
CDIF630erm_00599	[gene=CD630DERM_04710]	blaI	-0.05	-0.11	-0.04	-0.12	0.405383	0.583557	0.265051	0.0285313
CDIF630erm_00600	[gene=CD630DERM_04720]		0.04	0.32	0.96	0.74	0.129177	0.274173	1.99155e-05	3.64799e-05
CDIF630erm_00601	[gene=CD630DERM_04730]		0	-0.04	0.03	-0.31	0.966537	0.946813	0.954168	0.000184277
CDIF630erm_00602	[gene=CD630DERM_04740]		0.07	0.57	0.93	0.87	0.0777136	0.184866	5.61239e-05	5.78914e-05
CDIF630erm_00603	[gene=CD630DERM_04750]		0.05	0.02	0.14	0.07	0.0357466	0.517903	0.000413347	0.0012756
CDIF630erm_00604	[gene=CD630DERM_04760]		0.03	0.01	-0.23	-0.19	0.0889925	0.851716	0.00366533	0.00500138
CDIF630erm_00605	[gene=CD630DERM_04770]		-0.02	0.18	-0.13	-0.22	0.908703	0.388256	0.603937	0.00370254
CDIF630erm_00606	[gene=CD630DERM_04780]	spaF	0.08	0.09	0.15	0.04	0.0779597	0.377906	0.000660805	0.00815177
CDIF630erm_00607	[gene=CD630DERM_04790]	spaE	0.2	0.46	1.16	0.87	0.00793196	0.204233	6.77649e-05	1.46539e-05
CDIF630erm_00608	[gene=CD630DERM_04800]	spaG	0.23	0.34	0.81	0.4	0.00383942	0.172853	0.000399478	0.00173344
CDIF630erm_00609	[gene=CD630DERM_04810]	spaR	0.21	0.31	0.58	0.5	0.042978	0.27761	0.000168742	0.000430408
CDIF630erm_00610	[gene=CD630DERM_04820]	spaK	0.22	0.04	0.03	0.17	0.068903	0.711017	0.842556	0.0120569
CDIF630erm_00611	[gene=CD630DERM_04830]		0.01	0.03	0.27	0.22	0.446169	0.534603	3.56646e-05	4.32925e-05
CDIF630erm_00612	[gene=CD630DERM_04840]		0.05	0.26	0.5	0.45	0.0547824	0.173466	0.000172435	7.72541e-05
CDIF630erm_00613	[gene=CD630DERM_04850]		0.03	0.15	0.29	0.21	0.0881115	0.235675	5.13864e-05	7.90229e-05
CDIF630erm_00614	[gene=CD630DERM_04860]		0.03	0.07	0.07	0.07	0.047174	0.40644	0.0053767	0.000904344
CDIF630erm_00615	[gene=CD630DERM_04870]		0.16	0.38	0.18	0.2	0.0304432	0.165784	0.000699965	0.000337781
CDIF630erm_00617	[gene=CD630DERM_04880]	sugE	0.02	0.03	0.16	0.07	0.318387	0.617029	0.000207822	0.00118481
CDIF630erm_00618	[gene=CD630DERM_04890]	purC1	-1.84	-2.22	-2.18	-3.42	0.0013325	0.0325396	3.96213e-06	8.26803e-06
CDIF630erm_00619	[gene=CD630DERM_04900]	xpdH2	0.02	0.1	0.27	0.41	0.253692	0.344661	5.98343e-05	0.000195585
CDIF630erm_00620	[gene=CD630DERM_04910]		-0.16	-0.14	-0.17	-0.19	0.00885109	0.415569	0.0395512	0.0115541
CDIF630erm_00621	[gene=CD630DERM_04920]		-0.07	0.13	0.48	0.21	0.0314506	0.427694	0.000407548	0.0108868
CDIF630erm_00622	[gene=CD630DERM_04930]		0.02	0.31	1.04	0.67	0.803841	0.328355	5.198e-05	0.000283381
CDIF630erm_00623	[gene=CD630DERM_04940]		-0.08	0.38	1.4	1.29	0.128919	0.29398	8.88656e-06	2.88116e-05
CDIF630erm_04101	[gene=CD630DERM_04960]		-0.11	0.49	0.02	0.11	0.0950941	0.171427	0.01606	0.0048715
CDIF630erm_04102	[gene=CD630DERM_04970]		-0.13	0.54	0.57	0.67	0.0623347	0.205774	9.82639e-05	0.00067098
CDIF630erm_04103	[gene=CD630DERM_04980]		-0.01	0.55	0.33	0.85	0.793544	0.187223	0.00147194	2.06608e-05
	[gene=CD630DERM_04981]		-0.02	0.59	0.8	0.98	0.591529	0.181455	3.96855e-05	2.41629e-05
CDIF630erm_04104	[gene=CD630DERM_04990]		0.06	0.98	2.03	1.4	0.349593	0.15181	1.80775e-05	2.27749e-05
CDIF630erm_04105	[gene=CD630DERM_04991]		-0.09	0.18	0.07	0.08	0.115845	0.241817	0.00245194	0.00076029
CDIF630erm_04106	[gene=CD630DERM_05000]		-0.09	0.33	0.43	0.34	0.116348	0.204117	2.87498e-05	7.96595e-05
	[gene=CD630DERM_05010]		0.04	0.27	0.37	0.35	0.0721503	0.171734	2.41479e-05	4.10615e-05
CDIF630erm_04107	[gene=CD630DERM_05020]		0.01	0.25	0.45	0.37	0.293152	0.18822	4.38283e-05	4.27067e-05
CDIF630erm_04108	[gene=CD630DERM_05030]		0.01	0.27	0.59	0.55	0.43257	0.231701	0.000117258	4.12682e-05
CDIF630erm_04111	[gene=CD630DERM_05060]		0.05	0.59	0.68	0.99	0.118071	0.115783	2.87207e-05	1.07773e-05
CDIF630erm_04113	[gene=CD630DERM_05070]		0.02	0.02	0.35	0.24	0.132943	0.514827	0.000144295	9.32392e-05
CDIF630erm_04114	[gene=CD630DERM_05080]	tetM	-0.12	-0.6	-0.27	-0.13	0.0332761	0.152688	0.000393687	0.0202893
	[gene=CD630DERM_05081]		0.01	0.18	-0.68	-0.54	0.265615	0.329334	0.000120966	0.000135805
CDIF630erm_04115	[gene=CD630DERM_05090]		0.09	0.22	0.25	0.24	0.00847138	0.170685	0.000396055	0.000484174
	[gene=CD630DERM_05091]		-0.12	-0.02	-0.23	-0.47	0.00587029	0.483858	4.18072e-05	3.87017e-05
CDIF630erm_04116	[gene=CD630DERM_05100]		-0.46	0.58	0.01	-0.17	0.00235349	0.306184	0.194321	0.00541165
CDIF630erm_04117	[gene=CD630DERM_05101]		-0.45	0.57	-0.1	-0.3	0.00129553	0.312202	0.00140378	0.000194681
CDIF630erm_04118	[gene=CD630DERM_05103]		-0.43	0.16	-0.34	-0.47	0.00195352	0.545811	0.000194903	4.40041e-05
CDIF630erm_04119	[gene=CD630DERM_05110]	tndX	-0.39	0.18	-0.23	-0.21	0.00102362	0.593956	0.00132884	0.000326401
CDIF630erm_00625	[gene=CD630DERM_05130]		-0.27	-0.14	-0.35	-0.21	0.00135039	0.636532	0.000235886	0.0210232
CDIF630erm_00626	[gene=CD630DERM_05140]	cwpV	0.32	1.41	0.56	-0.17	0.277837	0.105302	0.546052	0.0091747
CDIF630erm_00627	[gene=CD630DERM_05150]	dacF1	-0.18	-0.02	-0.02	0.02	0.00531667	0.921335	0.135681	0.650537
CDIF630erm_00628	[gene=CD630DERM_05160]		-0.16	-0.2	-0.21	-0.22	0.00610662	0.302569	0.00483622	0.000420535
CDIF630erm_00629	[gene=CD630DERM_05170]		-0.13	-0.16	-0.18	0.05	0.0235792	0.429669	0.130507	0.00991847
CDIF630erm_00630	[gene=CD630DERM_05180]		-0.1	0.23	0.91	0.83	0.0239011	0.670995	0.000334708	3.03294e-05
CDIF630erm_00631	[gene=CD630DERM_05190]		-0.7	-0.05	0.46	0.02	0.0259334	0.257797	0.475893	0.0104019
CDIF630erm_00632	[gene=CD630DERM_05200]		-0.26	-0.31	-0.3	-0.32	0.00171024	0.169273	0.00207923	0.000475274
CDIF630erm_00633	[gene=CD630DERM_05210]		-0.31	-0.2	0.85	0.14	0.00086753	0.193527	0.00132519	0.189743
CDIF630erm_00634	[gene=CD630DERM_05211]		-0.03	-0.11	-0.12	-0.17	0.366347	0.512481	0.35002	0.00311263
CDIF630erm_00635	[gene=CD630DERM_05220]		-0.07	-0.03	0.35	0.13	0.145253	0.874978	0.00142993	0.356231
CDIF630erm_00636	[gene=CD630DERM_05230]		-0.08	-0.04	0.62	0.34	0.024397	0.720295	0.000607198	0.0556576
CDIF630erm_00637	[gene=CD630DERM_05240]	yqjE	-0.85	-0.4	0.13	-0.03	0.000517608	0.232557	0.0136542	0.964185
CDIF630erm_00640	[gene=CD630DERM_05270]		0.07	0.01	0.21	0.16	0.00787178	0.501488	0.000132113	0.000223275
CDIF630erm_00641	[gene=CD630DERM_05280]		-0.14	-0.05	0.46	-0.03	0.00582508	0.883387	0.000413822	0.59652
CDIF630erm_00642	[gene=CD630DERM_05290]		-0.05	-0.02	0.24	0.09	0.256795	0.634946	0.00027338	0.000741838
CDIF630erm_00643	[gene=CD630DERM_05300]		-0.15	0.04	0.31	0.33	0.00611216	0.479501	0.00360551	5.18458e-05
CDIF630erm_00644	[gene=CD630DERM_05310]		-0.08	0.18	0.77	0.79	0.178979	0.271258	1.19571e-05	4.46874e-05
CDIF630erm_00645	[gene=CD630DERM_05320]		-0.17	-0.32	-0.41	-0.5	0.00525394	0.133733	0.000401531	2.44043e-05
CDIF630erm_00646	[gene=CD630DERM_05330]	cheY	-0.25	-0.44	-0.47	-0.54	0.00948946	0.127588	2.69634e-05	0.000190887
CDIF630erm_00647	[gene=CD630DERM_05340]	cheC	-0.2	-0.33	-0.33	-0.49	0.0052516	0.181785	0.00036054	2.29484e-05
CDIF630erm_00648	[gene=CD630DERM_05350]	cheD	-0.26	-0.28	0	-0.31	0.00191023	0.19866	0.00207923	0.000120684
CDIF630erm_00649	[gene=CD630DERM_05360]	cheW1	-0.25	-0.35	-0.46	-0.55	0.00209181	0.170732	5.8169e-05	1.17873e-05
CDIF630erm_00650	[gene=CD630DERM_05370]		-0.17	-0.1	0.52	0.37	0.00438152	0.495882	0.00039114	0.0110616
CDIF630erm_00651	[gene=CD630DERM_05380]		-0.16	-0.19	0.39	0.02	0.00413599	0.31867	0.0236594	0.417746
CDIF630erm_00652	[gene=CD630DERM_05390]	cheA	-0.17	-0.14	0.49	0.19	0.00375207	0.413205	0.00412672	0.29879
CDIF630erm_00653	[gene=CD630DERM_05400]	cheW2	-0.16	-0.34	-0.51	-0.63	0.00409884	0.181571	8.48523e-05	1.23477e-05
CDIF630erm_00654	[gene=CD630DERM_05410]	cheR	-0.14	-0.3	0.47	0.03	0.0163842	0.19866	0.132123	0.000440933
CDIF630erm_00655	[gene=CD630DERM_05420]	cheB	-0.08	-0.32	-0.44	-0.56	0.0752222	0.210582	3.25331e-05	2.65011e-05
CDIF630erm_00656	[gene=CD630DERM_05430]		0.05	0.04	0.29	0.24	0.0221506	0.572907	0.000523406	9.90927e-05
CDIF630erm_00657	[gene=CD630DERM_05440]	arcB	0.5	0.86	1.05	0.68	0.0104796	0.0594494	8.73571e-05	0.000134915
CDIF630erm_00658	[gene=CD630DERM_05450]		0.61	0.43	-0.26	0.1	0.00213898	0.766736	0.00204389	0.0999428
CDIF630erm_00659	[gene=CD630DERM_05460]		0.27	0.26	0.19	0.22	0.0176803	0.373745	0.697127	0.0198295
CDIF630erm_00660	[gene=CD630DERM_05470]		0.07	-0.31	-0.45	-0.43	0.394655	0.27009	1.45128e-05	0.000100282
CDIF630erm_00661	[gene=CD630DERM_05480]		0.07	-0.18	-0.34	-0.34	0.350512	0.340324	0.000556411	0.000324996
CDIF630erm_00662	[gene=CD630DERM_05490]		-0.17	0.65	1.57	1.11	0.0997246	0.249031	8.88656e-06	0.000285434
CDIF630erm_00663	[gene=CD630DERM_05500]		0.31	0.12	-0.12	-0.1	0.00518895	0.609779	0.179471	0.18425
CDIF630erm_00664	[gene=CD630DERM_05510]	sleC	0.05	0.21	0.58	0.46	0.0815517	0.237345	1.86449e-05	2.04863e-05
CDIF630erm_00665	[gene=CD630DERM_05520]	prsW	0.05	-0.01	0.31	0.28	0.0147515	0.607053	3.76329e-05	3.8285e-05
CDIF630erm_00666	[gene=CD630DERM_05530]		0.05	-0.02	0.37	0.31	0.135097	0.764046	0.000181483	0.000175033
CDIF630erm_00667	[gene=CD630DERM_05540]	spsB1	0.48	0.52	1.09	0.84	0.00060789	0.148697	2.77416e-05	0.000276795
CDIF630erm_00668	[gene=CD630DERM_05550]	spsB2	0.36	0.25	0.49	0.2	0.00129553	0.934767	0.590199	0.0123056
CDIF630erm_00669	[gene=CD630DERM_05560]		0.32	-0.03	-0.41	-0.38	0.00104787	0.625081	8.50239e-05	0.000221252
CDIF630erm_00670	[gene=CD630DERM_05570]	thrS/udk	0.4	0.05	-0.17	-0.33	0.00086753	0.856511	0.0043677	0.000297361
CDIF630erm_00671	[gene=CD630DERM_05580]	glsA	0.24	0.22	0.33	0.78	0.00754014	0.334504	0.00384023	2.00879e-05
CDIF630erm_00672	[gene=CD630DERM_05590]		1.34	0.18	0.57	2.18	0.00356918	0.253246	8.10745e-05	4.0056e-05
CDIF630erm_00673	[gene=CD630DERM_05600]	nfo	0.19	0.41	0.65	0.35	0.0437836	0.69572	0.12528	0.2191
CDIF630erm_00674	[gene=CD630DERM_05610]		1.14	0.41	0.53	1.34	0.00149639	0.390119	0.00196751	0.000100452
CDIF630erm_00675	[gene=CD630DERM_05620]		-0.06	-0.1	-0.08	-0.05	0.346164	0.643947	0.604784	0.548645
	[gene=CD630DERM_05621]		0.35	0.04	-0.23	-0.13	0.00129553	0.82205	0.0131151	0.115916
CDIF630erm_00676	[gene=CD630DERM_05630]	queG	0.54	-0.09	-0.37	-0.07	0.00199657	0.619536	0.000509394	0.842811
CDIF630erm_00677	[gene=CD630DERM_05640]		1.15	0.32	0.12	1.49	0.00289205	0.202132	0.00304104	5.54151e-05
CDIF630erm_00678	[gene=CD630DERM_05650]	nth	0.48	0.31	0.77	0.75	0.00475964	0.138116	4.62377e-05	6.21644e-05
CDIF630erm_00679	[gene=CD630DERM_05660]	trmL	0.57	-0.05	0.18	0.81	0.0142946	0.654373	0.372321	0.000149259
CDIF630erm_00680	[gene=CD630DERM_05670]		0.41	0.25	1.18	0.91	0.0387079	0.553229	0.000221368	0.000122646
CDIF630erm_00681	[gene=CD630DERM_05690]		0.01	0.01	0.68	0.6	0.670266	0.760735	6.25359e-05	0.0011609
CDIF630erm_00682	[gene=CD630DERM_05700]		0.1	-0.18	-0.24	-0.27	0.160922	0.370889	0.00103246	0.000393876
CDIF630erm_00683	[gene=CD630DERM_05710]		0.1	0.02	-0.12	-0.19	0.0193967	0.873105	0.500153	0.00391061
CDIF630erm_00684	[gene=CD630DERM_05720]		0.04	-0.08	-0.28	-0.41	0.265532	0.622497	0.00393478	4.06445e-05
CDIF630erm_00685	[gene=CD630DERM_05730]		0.13	-0.26	-0.56	-0.73	0.0351665	0.315772	0.000128274	2.60468e-05
CDIF630erm_00687	[gene=CD630DERM_05740]	thrS	1.39	1.13	-0.08	-0.09	0.00129303	0.053612	0.0108572	0.0827755
CDIF630erm_00688	[gene=CD630DERM_05750]		-0.16	-0.42	-0.73	-0.71	0.0471913	0.158591	3.16152e-05	1.02822e-05
CDIF630erm_00689	[gene=CD630DERM_05760]		-0.11	-0.06	0.28	0.24	0.020982	0.890552	0.000678589	0.00202179
CDIF630erm_00690	[gene=CD630DERM_05770]		0.88	0.69	-0.33	0.11	0.00725602	0.212377	0.00674	0.0329578
CDIF630erm_00691	[gene=CD630DERM_05780]		0.05	0.13	0.43	0.3	0.0896924	0.302503	2.76623e-05	3.91027e-05
CDIF630erm_00692	[gene=CD630DERM_05790]		0.07	0.1	0.21	0.14	0.0190445	0.348258	0.000201195	0.000163537
CDIF630erm_00693	[gene=CD630DERM_05800]	gapN	1.41	0.07	0.22	0.87	0.00849514	0.817837	0.797027	0.0480381
CDIF630erm_00694	[gene=CD630DERM_05810]		0.1	0.23	0.46	0.33	0.0172148	0.190276	1.45128e-05	3.31053e-05
CDIF630erm_00695	[gene=CD630DERM_05820]		0.18	0.11	0.27	0.22	0.00255394	0.2961	4.35842e-05	9.05777e-05
	[gene=CD630DERM_05821]		0.08	0.21	0.26	0.19	0.0100248	0.195802	0.000486066	0.00014718
CDIF630erm_00696	[gene=CD630DERM_05830]		-0.24	-0.29	-0.43	-0.28	0.00346493	0.213277	0.000422025	0.000165824
CDIF630erm_00697	[gene=CD630DERM_05840]		-0.16	-0.08	-0.04	-0.07	0.00697022	0.791469	0.242463	0.469377
CDIF630erm_00698	[gene=CD630DERM_05850]		-0.02	-0.12	-0.17	-0.22	0.885979	0.546792	0.107506	0.00314447
CDIF630erm_00699	[gene=CD630DERM_05860]		-0.05	-0.2	-0.42	-0.55	0.334938	0.354831	0.000127389	1.68925e-05
CDIF630erm_00700	[gene=CD630DERM_05870]		1.64	2.98	0.01	-0.2	0.00489959	0.0445367	0.0640313	0.0550485
CDIF630erm_00701	[gene=CD630DERM_05880]		1.46	2.6	-0.21	-0.36	0.00615171	0.0500768	0.0260871	0.00131448
CDIF630erm_00702	[gene=CD630DERM_05890]		0.44	0.8	1.36	1.12	0.00638029	0.053612	7.47556e-06	2.84635e-05
CDIF630erm_00703	[gene=CD630DERM_05900]		0.38	0.75	1.19	0.81	0.0253642	0.0511143	1.30822e-05	0.000946057
CDIF630erm_00704	[gene=CD630DERM_05910]		-1.54	-1.11	-0.25	-0.49	0.0012293	0.05096	7.94755e-05	3.51134e-05
CDIF630erm_00705	[gene=CD630DERM_05920]		-1.38	-1.02	-0.2	-0.47	0.0012293	0.0358755	0.000470373	9.05777e-05
CDIF630erm_00706	[gene=CD630DERM_05921]		-0.1	-0.13	-0.19	-0.18	0.036489	0.360642	0.00429716	0.00167965
CDIF630erm_00707	[gene=CD630DERM_05930]		0.01	0.08	0.19	0.2	0.484694	0.400386	0.000145167	6.69326e-05
CDIF630erm_00708	[gene=CD630DERM_05940]		-0.58	-0.38	0.23	0.09	0.00060789	0.176362	0.229045	0.174126
CDIF630erm_00709	[gene=CD630DERM_05950]		-0.56	-0.42	-0.3	-0.57	0.000717311	0.13733	4.79357e-05	1.5665e-05
CDIF630erm_00710	[gene=CD630DERM_05960]		0	0	0.15	0.1	0.502827	0.77284	0.00127379	0.000721727
CDIF630erm_00711	[gene=CD630DERM_05970]	cotF	0.05	0.13	0.2	0.17	0.076334	0.256346	0.000232895	0.000459796
CDIF630erm_00712	[gene=CD630DERM_05980]	cotCB	0.01	0.1	0.29	0.18	0.449904	0.354972	0.000221843	0.000300826
CDIF630erm_00713	[gene=CD630DERM_06000]		-0.02	0.07	1.14	0.67	0.740097	0.239366	0.00010416	0.00190285
CDIF630erm_00714	[gene=CD630DERM_06010]	ogt1	0	0.26	0.17	0.14	0.503737	0.417739	0.000348957	0.000266336
	[gene=CD630DERM_06011]		-0.05	-0.05	-0.2	-0.22	0.502827	0.813766	0.033533	0.000661937
	[gene=CD630DERM_06012]		-0.07	0.17	1.15	1.24	0.165028	0.265857	1.31678e-05	1.92106e-05
CDIF630erm_00715	[gene=CD630DERM_06020]		0.04	-0.24	-0.59	-0.47	0.259875	0.311401	7.05459e-05	8.50219e-05
CDIF630erm_00716	[gene=CD630DERM_06040]		-0.1	-0.22	-0.27	-0.04	0.0840187	0.282386	0.00428321	0.685796
CDIF630erm_00719	[gene=CD630DERM_06052]		0.12	0.26	0.63	0.57	0.0131714	0.24427	2.05829e-05	1.90114e-05
CDIF630erm_00718	[gene=CD630DERM_06060]		0.13	0.37	0.66	0.82	0.168795	0.155878	5.87333e-05	2.59732e-05
	[gene=CD630DERM_06071]	tlpB	0.16	-0.41	-0.64	-0.25	0.639336	0.230868	0.000386831	0.00591825
CDIF630erm_00720	[gene=CD630DERM_06080]		-0.03	-0.16	0.06	-0.19	0.619258	0.39632	0.970674	0.0191044
CDIF630erm_00721	[gene=CD630DERM_06090]		-0.12	-0.19	-0.19	-0.26	0.00943928	0.270715	0.0314904	0.000756444
CDIF630erm_00722	[gene=CD630DERM_06100]		0.27	0.05	0.23	0.47	0.00314905	0.475608	0.000140387	2.46579e-05
CDIF630erm_00723	[gene=CD630DERM_06110]		0.49	0.3	0.4	1.15	0.00238114	0.134063	0.00073162	2.00879e-05
CDIF630erm_00724	[gene=CD630DERM_06120]		0	0.29	0.81	0.6	0.42772	0.24427	1.52848e-05	0.000510775
CDIF630erm_00725	[gene=CD630DERM_06130]		0.06	0.16	0.38	0.25	0.0223449	0.236599	2.72689e-05	0.000154439
CDIF630erm_00726	[gene=CD630DERM_06140]		-0.09	-0.41	-0.41	-0.41	0.23377	0.144532	0.000218678	0.000490978
CDIF630erm_00727	[gene=CD630DERM_06150]		-0.17	-0.17	-0.09	-0.02	0.0424429	0.303265	0.00338031	0.0611074
CDIF630erm_00728	[gene=CD630DERM_06160]		-0.23	-0.21	-0.09	-0.24	0.0037793	0.264223	0.91374	0.00225999
CDIF630erm_00729	[gene=CD630DERM_06170]		-0.16	-0.16	-0.03	-0.09	0.00429742	0.615395	0.168609	0.175333
CDIF630erm_00730	[gene=CD630DERM_06180]		-0.09	0.01	0.16	0.06	0.00849514	0.685754	0.00168033	0.000836711
CDIF630erm_00731	[gene=CD630DERM_06190]	yvrJ	-0.01	0.09	0.1	0.15	0.728169	0.341431	0.0690737	0.000138846
CDIF630erm_00732	[gene=CD630DERM_06200]		-0.01	-0.02	0.01	0	0.785658	0.952441	0.449597	0.316146
	[gene=CD630DERM_06210]		-0.1	0.01	0.16	0.06	0.0892306	0.675375	0.000614865	0.00102162
CDIF630erm_00734	[gene=CD630DERM_06220]		-0.07	-0.11	-0.05	-0.05	0.0505248	0.456363	0.579593	0.305563
	[gene=CD630DERM_06230]		-0.04	0.02	0.05	0.03	0.479225	0.783101	0.68317	0.151237
CDIF630erm_00735	[gene=CD630DERM_06240]		0.15	0.26	0.96	0.86	0.021802	0.203217	9.31776e-06	5.39696e-05
CDIF630erm_00736	[gene=CD630DERM_06250]		-0.08	-0.14	0.01	-0.05	0.00939851	0.464776	0.0303958	0.836253
CDIF630erm_00737	[gene=CD630DERM_06260]		-0.03	0.24	0.76	0.1	0.598818	0.273503	4.17798e-05	0.0097737
CDIF630erm_00738	[gene=CD630DERM_06270]		-0.14	-0.18	0.07	0.13	0.0217994	0.552634	0.00662335	0.00401685
CDIF630erm_00739	[gene=CD630DERM_06271]		-3.27	-1.7	-0.57	-0.3	0.0163842	0.0721691	0.00972209	0.232738
CDIF630erm_00740	[gene=CD630DERM_06280]		-4.42	-2.85	-1.4	-1.53	0.00943441	0.0424184	0.00739845	0.0537572
CDIF630erm_00741	[gene=CD630DERM_06290]		0.33	0.46	1.05	0.87	0.0102735	0.141007	1.58834e-05	3.36962e-05
CDIF630erm_00742	[gene=CD630DERM_06300]		0.11	0.64	1.56	1.25	0.00615366	0.197671	7.6303e-06	9.75337e-06
CDIF630erm_00743	[gene=CD630DERM_06310]		-0.13	-0.18	-0.19	-0.25	0.0132311	0.303265	0.0411922	0.00232139
CDIF630erm_00744	[gene=CD630DERM_06320]		-0.22	-0.25	-0.22	-0.27	0.00330111	0.233182	0.00572921	0.000461104
CDIF630erm_00745	[gene=CD630DERM_06330]		0.03	-0.07	0.12	0.12	0.212793	0.875161	0.0110775	0.0110801
CDIF630erm_00746	[gene=CD630DERM_06340]		0.1	0.2	0.77	0.45	0.0569054	0.261386	0.000136125	0.000950056
CDIF630erm_00747	[gene=CD630DERM_06350]		0.1	0.05	0.29	0.26	0.0491249	0.74613	0.00268876	0.0136072
CDIF630erm_00748	[gene=CD630DERM_06360]		0.03	0.15	0.2	0.28	0.272517	0.30845	0.000392273	0.0018923
CDIF630erm_00749	[gene=CD630DERM_06370]		0.04	-0.03	-0.08	-0.17	0.147967	0.97557	0.822363	0.0075611
CDIF630erm_00750	[gene=CD630DERM_06380]		0.09	-0.18	-0.42	-0.53	0.157202	0.401191	0.000124964	3.3513e-05
CDIF630erm_00751	[gene=CD630DERM_06390]		0.04	-0.19	-0.39	-0.21	0.19505	0.330744	0.000336836	0.000699332
CDIF630erm_00752	[gene=CD630DERM_06400]		0.02	-0.18	-0.34	-0.18	0.402036	0.296927	0.000570141	0.00161047
CDIF630erm_00753	[gene=CD630DERM_06410]		0.05	-0.01	-0.1	-0.14	0.0905312	0.899419	0.455141	0.00666108
CDIF630erm_00754	[gene=CD630DERM_06420]		0.13	-0.07	-0.1	-0.1	0.0339857	0.599364	0.642629	0.0456555
CDIF630erm_00755	[gene=CD630DERM_06421]		-0.17	0.88	-0.99	-1.52	0.00235325	0.473467	5.04889e-06	1.82977e-05
CDIF630erm_00756	[gene=CD630DERM_06430]		0.1	-0.01	-0.09	-0.18	0.0762915	0.974271	0.85923	0.007998
CDIF630erm_00757	[gene=CD630DERM_06440]		0.08	-0.09	-0.19	-0.29	0.0501163	0.630507	0.0282883	0.000448262
CDIF630erm_00758	[gene=CD630DERM_06450]		0.23	-0.01	-0.11	-0.04	0.00777871	0.841033	0.0242112	0.00655721
CDIF630erm_00759	[gene=CD630DERM_06460]		0.06	-0.07	-0.26	-0.31	0.120711	0.639616	0.00332199	0.0014225
CDIF630erm_00760	[gene=CD630DERM_06480]		0.25	0.51	0.69	0.29	0.0473999	0.145344	0.000389946	0.0164067
CDIF630erm_00761	[gene=CD630DERM_06490]		-0.04	0.25	0.87	0.69	0.154973	0.24048	1.45128e-05	4.56973e-05
CDIF630erm_00762	[gene=CD630DERM_06500]		0.04	0.33	0.92	0.65	0.0392237	0.242475	1.38471e-05	5.39696e-05
CDIF630erm_00763	[gene=CD630DERM_06510]		-0.08	0.01	0.2	0.11	0.0255668	0.568157	0.00133913	0.00198859
	[gene=CD630DERM_06511]		0.05	0.04	0.26	0.21	0.052703	0.48786	0.000190629	6.5195e-05
	[gene=CD630DERM_06512]		0.09	0	0.17	0.14	0.00415362	0.648993	0.00389465	0.00124554
CDIF630erm_00764	[gene=CD630DERM_06520]		-0.18	-0.19	-0.27	-0.25	0.00195352	0.256217	0.00293442	0.00202648
CDIF630erm_00765	[gene=CD630DERM_06530]		-0.1	-0.02	-0.09	-0.04	0.0245409	0.902479	0.91097	0.622184
CDIF630erm_00766	[gene=CD630DERM_06540]		-0.07	0.02	0.08	0.04	0.140219	0.533406	0.0103557	0.00515385
CDIF630erm_00768	[gene=CD630DERM_06550]		-0.27	-0.15	-0.08	-0.12	0.00140721	0.849306	0.881476	0.0940427
CDIF630erm_00769	[gene=CD630DERM_06560]		0.04	0.18	0.48	0.47	0.0889925	0.162781	2.28946e-05	0.000100627
CDIF630erm_00770	[gene=CD630DERM_06570]	cdu2	0.11	0.43	0.74	0.5	0.00476184	0.193635	3.46048e-05	0.000297361
CDIF630erm_00771	[gene=CD630DERM_06580]	cdu1	-0.03	0.08	-0.55	-0.59	0.46774	0.953299	2.28946e-05	1.67775e-05
CDIF630erm_00772	[gene=CD630DERM_06590]	tcdR	-0.08	-0.03	0.08	0.07	0.0531571	0.992501	0.0205373	0.00508021
CDIF630erm_00773	[gene=CD630DERM_06600]	toxB	0.09	0.2	0.77	0.43	0.0079974	0.225499	1.00025e-05	6.0832e-05
CDIF630erm_00774	[gene=CD630DERM_06610]	tcdE	-0.02	-0.06	-0.01	0.02	0.80582	0.869103	0.141189	0.0117534
CDIF630erm_00775	[gene=CD630DERM_06620]		0.12	0.89	1.6	1.13	0.0317516	0.172312	6.19153e-06	2.07018e-05
CDIF630erm_00776	[gene=CD630DERM_06630]	toxA	0.09	0.71	1.61	0.85	0.0513438	0.158145	8.88656e-06	0.000213794
CDIF630erm_00777	[gene=CD630DERM_06640]	tcdC	0.45	0.18	0.01	0.39	0.00988459	0.837544	0.135774	0.000935225
CDIF630erm_00778	[gene=CD630DERM_06641]		0.04	0.66	1.53	1.35	0.716026	0.172838	7.85433e-06	2.10017e-05
CDIF630erm_00779	[gene=CD630DERM_06642]		-0.05	-0.26	-0.6	-0.65	0.542368	0.289578	1.60311e-05	1.13006e-05
CDIF630erm_00780	[gene=CD630DERM_06650]	cdd2	0.07	-0.02	0.25	0.18	0.00902775	0.649524	9.76756e-05	0.000222441
CDIF630erm_00781	[gene=CD630DERM_06660]	cdd3	-0.01	0.04	0.17	0.16	0.742678	0.544105	0.000281998	0.000113663
CDIF630erm_00782	[gene=CD630DERM_06670]	cdd4	-0.01	0.23	0.49	0.46	0.869487	0.20765	5.63933e-05	0.000180147
CDIF630erm_00783	[gene=CD630DERM_06680]		0.47	0.2	0.75	1.08	0.00117314	0.21514	1.45128e-05	2.28744e-05
CDIF630erm_00784	[gene=CD630DERM_06690]		0.47	0	-0.25	0.25	0.000824506	0.874749	0.00862839	0.00120462
CDIF630erm_00785	[gene=CD630DERM_06700]		-0.11	-0.11	-0.09	-0.14	0.0120402	0.555441	0.390619	0.0121805
CDIF630erm_00786	[gene=CD630DERM_06710]		-0.09	-0.07	-0.05	-0.02	0.021635	0.860718	0.43195	0.138833
CDIF630erm_00787	[gene=CD630DERM_06720]		-1.87	-1.49	-0.16	-0.97	0.000391069	0.0205633	6.70797e-05	3.1626e-05
CDIF630erm_00788	[gene=CD630DERM_06730]		-0.49	-0.36	0.09	0.04	0.00166994	0.20131	0.958352	0.154359
	[gene=CD630DERM_06740]		-0.16	-0.21	-0.25	-0.19	0.0052516	0.236962	0.00727421	0.00218194
CDIF630erm_00789	[gene=CD630DERM_06750]		-0.36	-0.53	-0.54	-0.57	0.00197161	0.0445367	3.52564e-05	1.6858e-05
CDIF630erm_00790	[gene=CD630DERM_06760]	rsiT	0.09	0.16	0.24	0.19	0.00579275	0.223033	6.27403e-05	0.000118699
CDIF630erm_00791	[gene=CD630DERM_06770]	csfT	0.07	0.43	1.13	0.94	0.0202407	0.20074	1.573e-05	1.2376e-05
CDIF630erm_00792	[gene=CD630DERM_06790]		0.06	0.16	1.06	4.76	0.0537139	0.312202	0.000246317	6.91452e-06
CDIF630erm_00793	[gene=CD630DERM_06800]		-0.05	-0.05	0.4	4.07	0.045135	0.830709	0.00622628	1.11222e-05
CDIF630erm_00794	[gene=CD630DERM_06810]		0.14	0.76	2.05	3.98	0.019121	0.167931	4.00028e-06	5.19276e-06
CDIF630erm_00795	[gene=CD630DERM_06820]		0.02	0.02	0.37	3.77	0.253418	0.540834	0.00612402	5.95592e-06
CDIF630erm_00796	[gene=CD630DERM_06830]		0.13	0.54	1.57	3.76	0.0485414	0.191042	2.38214e-05	5.53847e-06
CDIF630erm_00797	[gene=CD630DERM_06840]		0.02	0.2	0.44	0.36	0.146312	0.1978	0.000299589	4.70665e-05
CDIF630erm_00798	[gene=CD630DERM_06850]	infC	-0.65	-1	-0.06	0.44	0.00515777	0.0727593	0.0265739	0.787
CDIF630erm_00799	[gene=CD630DERM_06860]	rpmI	-0.65	-1.37	-0.7	0.02	0.00222349	0.0658135	0.00482874	0.0906672
CDIF630erm_00800	[gene=CD630DERM_06870]	rplT	-0.63	-1.06	-0.62	-0.04	0.00211547	0.0504756	0.00436766	0.0411747
CDIF630erm_00801	[gene=CD630DERM_06880]		0.08	0.13	0.04	0.1	0.0315586	0.233182	0.00355223	0.000259392
CDIF630erm_00802	[gene=CD630DERM_06890]		0.19	0.01	-0.22	0.05	0.0169657	0.970729	0.0245081	0.147796
CDIF630erm_00803	[gene=CD630DERM_06900]		0.01	0.11	0.59	0.4	0.491275	0.342118	0.000101586	9.03486e-05
CDIF630erm_00804	[gene=CD630DERM_06910]		0.08	-0.01	0.05	0.07	0.0135117	0.65705	0.00761113	0.000904344
CDIF630erm_00805	[gene=CD630DERM_06920]		-0.02	0.12	0.17	0.19	0.792324	0.319621	0.0119826	0.0102612
CDIF630erm_00806	[gene=CD630DERM_06930]		0.02	0.09	0.19	0.12	0.0889449	0.335289	0.000274719	0.000479386
CDIF630erm_00807	[gene=CD630DERM_06940]		-0.1	-0.17	-0.16	-0.28	0.0153371	0.324301	0.157478	0.000281157
CDIF630erm_00808	[gene=CD630DERM_06941]		-0.03	0	0.01	-0.03	0.523856	0.810612	0.0122654	0.127705
CDIF630erm_00809	[gene=CD630DERM_06950]		0.06	0.08	0.18	0.12	0.0133298	0.363763	0.000310837	0.00024201
CDIF630erm_00810	[gene=CD630DERM_06960]	ktrB	0.28	0.2	0.26	-0.05	0.00322937	0.270715	0.000387179	0.376034
CDIF630erm_00811	[gene=CD630DERM_06970]	ktrC	0.12	0.16	0.16	0	0.0146734	0.281568	0.014781	0.289826
CDIF630erm_00812	[gene=CD630DERM_06980]		-0.1	-0.13	0.12	0.02	0.0355466	0.554078	0.00836492	0.799543
CDIF630erm_00814	[gene=CD630DERM_06990]	pheS	-0.09	-0.25	-0.15	-0.62	0.0264194	0.176362	0.000255866	3.35463e-05
CDIF630erm_00815	[gene=CD630DERM_07000]	pheT	-0.08	-0.17	0.02	-0.62	0.014945	0.167939	0.00107245	2.78095e-05
CDIF630erm_00816	[gene=CD630DERM_07010]		-0.12	-0.22	-0.64	-1.02	0.00444118	0.182891	7.45771e-06	4.67241e-06
CDIF630erm_00817	[gene=CD630DERM_07020]		-0.15	-0.21	-0.2	-0.27	0.00831815	0.227013	0.01606	0.000176223
CDIF630erm_00818	[gene=CD630DERM_07030]		-0.08	-0.24	-0.05	-0.11	0.0553558	0.258013	0.826974	0.0681625
CDIF630erm_00819	[gene=CD630DERM_07040]		0.34	0.19	0.29	-0.15	0.00628256	0.564076	0.0964307	0.00202146
CDIF630erm_00820	[gene=CD630DERM_07050]	mutX	0.34	0.21	0.1	-0.38	0.00665436	0.900671	0.00384698	0.000467169
CDIF630erm_00821	[gene=CD630DERM_07060]		0.24	0.1	0.4	0.23	0.0199303	0.941123	0.0318303	0.595505
CDIF630erm_00822	[gene=CD630DERM_07070]		0.41	0.22	0.11	0.98	0.00449591	0.606851	0.178153	4.81807e-05
CDIF630erm_00823	[gene=CD630DERM_07080]	pepD	0.03	1.19	-0.32	-0.07	0.254556	0.277294	3.20925e-05	0.000342357
CDIF630erm_00824	[gene=CD630DERM_07090]	mutS2	-0.04	-0.32	-0.36	-0.45	0.25262	0.173895	0.000218836	3.77156e-05
CDIF630erm_00825	[gene=CD630DERM_07100]	ybbK	-0.11	0.09	0.15	-0.1	0.0103802	0.616139	0.807624	0.0146353
CDIF630erm_00826	[gene=CD630DERM_07110]	argS	-0.21	-0.45	-0.23	-0.49	0.00326224	0.119834	6.99789e-05	7.0673e-05
CDIF630erm_00827	[gene=CD630DERM_07120]		-0.33	-0.57	-0.62	-0.67	0.00149728	0.122754	1.87217e-05	4.28875e-05
CDIF630erm_00828	[gene=CD630DERM_07121]		-0.29	-0.49	-0.65	-0.72	0.00195352	0.153327	2.09376e-05	7.78368e-06
CDIF630erm_00829	[gene=CD630DERM_07130]		-0.04	0.19	0.36	0.28	0.157018	0.491421	0.00070431	0.000418045
CDIF630erm_00830	[gene=CD630DERM_07140]		-0.1	-0.32	-0.35	-0.32	0.0206995	0.186891	0.000104307	0.00142097
CDIF630erm_00831	[gene=CD630DERM_07150]	ptb2	0.4	0.87	0.18	0.76	0.00528051	0.170394	0.119435	8.46773e-05
CDIF630erm_00832	[gene=CD630DERM_07160]	cooS	1.46	1.9	1.94	3.08	0.0012956	0.0100997	4.02237e-05	5.42734e-06
CDIF630erm_00833	[gene=CD630DERM_07170]	cooC	1.33	1.41	0.7	1.59	0.000708071	0.0306582	9.42724e-05	5.53847e-06
CDIF630erm_00834	[gene=CD630DERM_07180]	fhs	0.95	1.71	1.43	0.97	0.00101943	0.0445367	2.07548e-05	0.00258925
CDIF630erm_00835	[gene=CD630DERM_07190]	fchA	0.92	0.9	0.35	1.1	0.0030864	0.0629552	0.0473342	7.77042e-05
CDIF630erm_00836	[gene=CD630DERM_07200]	folD	0.93	0.9	0.87	1.33	0.00269767	0.060193	0.00628243	6.99064e-05
CDIF630erm_00837	[gene=CD630DERM_07210]	metV	1.03	1.07	0.58	1.37	0.00234495	0.0285651	0.0301035	5.18814e-05
CDIF630erm_00838	[gene=CD630DERM_07220]	metF	0.84	1.08	1.37	1.19	0.00277358	0.0293545	1.32077e-05	3.51627e-05
CDIF630erm_00839	[gene=CD630DERM_07230]	lpdA	0.9	1.04	1.14	1.36	0.00266544	0.0300815	4.38283e-05	1.06675e-05
CDIF630erm_00840	[gene=CD630DERM_07240]		0.96	0.79	0.14	0.64	0.00219773	0.148797	0.814894	0.00341575
CDIF630erm_00841	[gene=CD630DERM_07250]	acsD	1.32	1.27	0.34	1.07	0.00086753	0.1447	0.0469996	1.57392e-05
CDIF630erm_00842	[gene=CD630DERM_07260]	acsC	0.99	0.66	0.01	0.5	0.00196848	0.228925	0.498414	4.85471e-05
CDIF630erm_00843	[gene=CD630DERM_07270]	acsE	1.23	1.23	0.15	0.64	0.00125133	0.0428703	0.417617	3.44809e-05
CDIF630erm_00844	[gene=CD630DERM_07280]	cdhC	1.24	1.48	1.04	1.02	0.00086753	0.0262968	0.000376969	3.37625e-05
CDIF630erm_00845	[gene=CD630DERM_07290]	gcvH	0.76	1.16	-0.1	-0.03	0.0125909	0.0349835	0.000900901	0.00297339
CDIF630erm_00846	[gene=CD630DERM_07300]		0.5	0.39	0.12	0.16	0.00785516	0.165516	0.00884711	0.000415679
CDIF630erm_00847	[gene=CD630DERM_07310]		0.58	0.54	0.14	0.31	0.00533376	0.0858999	0.00261728	0.000148463
CDIF630erm_00848	[gene=CD630DERM_07320]		0.43	0.25	-0.07	-0.06	0.00391442	0.263699	0.838143	0.979539
CDIF630erm_00849	[gene=CD630DERM_07330]	lipM	0.49	0.2	-0.52	-0.24	0.00582508	0.898458	0.000194903	0.00301359
CDIF630erm_00850	[gene=CD630DERM_07340]		0.7	0.67	-0.09	0.71	0.0116391	0.563459	0.0323157	0.0021735
CDIF630erm_00851	[gene=CD630DERM_07350]		0.81	0.95	0.57	0.92	0.00289857	0.150324	0.159391	0.00051059
CDIF630erm_00852	[gene=CD630DERM_07360]		0.85	1.1	0.46	0.62	0.00202821	0.0692211	0.779203	0.0878783
CDIF630erm_00853	[gene=CD630DERM_07370]	hisK	-0.26	-0.45	-0.47	-0.42	0.00206023	0.138116	0.000127389	2.46579e-05
CDIF630erm_00854	[gene=CD630DERM_07380]		-0.07	0.04	0.15	0.08	0.14083	0.546792	0.000935925	0.024818
CDIF630erm_00855	[gene=CD630DERM_07390]		-0.61	-0.75	-0.25	-0.59	0.000715676	0.0273265	0.000103043	2.17094e-05
CDIF630erm_00856	[gene=CD630DERM_07400]		0.85	1.12	-0.37	-0.44	0.000795814	0.076292	9.33553e-05	0.000148463
CDIF630erm_00857	[gene=CD630DERM_07410]	glpK1	0.16	0.54	0.65	0.49	0.0281559	0.112409	2.80066e-05	0.000143795
CDIF630erm_00858	[gene=CD630DERM_07420]	eutH1	0.14	0.29	0.29	0.31	0.00290152	0.149725	8.73888e-05	2.58193e-05
CDIF630erm_00859	[gene=CD630DERM_07430]		0.12	0.04	0.14	0.25	0.0312092	0.666773	0.00179747	0.000127815
CDIF630erm_00861	[gene=CD630DERM_07440]		0.17	0.26	0.6	0.52	0.0459855	0.437645	0.00261989	0.00733813
CDIF630erm_00862	[gene=CD630DERM_07450]		0.16	-0.12	-0.27	-0.38	0.0424814	0.450355	0.00125541	5.59419e-05
CDIF630erm_00863	[gene=CD630DERM_07460]		0.02	-0.15	-0.11	-0.12	0.212289	0.517292	0.355523	0.0367525
CDIF630erm_00864	[gene=CD630DERM_07470]		0.15	-0.14	-0.54	-0.31	0.0465915	0.438289	1.96665e-05	0.00115501
CDIF630erm_00865	[gene=CD630DERM_07480]		0.11	-0.15	-0.25	-0.16	0.0326184	0.384941	0.00466844	0.00413477
CDIF630erm_00866	[gene=CD630DERM_07490]		0.02	-0.09	-0.23	-0.17	0.539832	0.563182	0.0444084	0.00353261
CDIF630erm_00868	[gene=CD630DERM_07500]		0.16	0.57	-0.33	-0.47	0.00472406	0.167841	0.00140514	8.91965e-05
CDIF630erm_00869	[gene=CD630DERM_07510]		0.12	0.02	0.06	-0.33	0.013016	0.956149	0.453606	0.0187651
CDIF630erm_00870	[gene=CD630DERM_07520]		0.1	0.08	-0.52	-0.71	0.108853	0.750742	2.26853e-05	1.6858e-05
CDIF630erm_00871	[gene=CD630DERM_07530]	iscS1	-0.02	-0.22	-0.26	0.2	0.28048	0.239366	0.00111863	0.00703171
CDIF630erm_00872	[gene=CD630DERM_07540]	thiI	-0.01	-0.06	0.96	0.5	0.0368632	0.475608	0.000792691	0.011385
CDIF630erm_00873	[gene=CD630DERM_07550]		0.01	-0.17	0.02	0.04	0.0834672	0.237073	0.00119543	0.00390355
CDIF630erm_00874	[gene=CD630DERM_07560]		0.47	0.46	0	0.2	0.00316816	0.19612	0.106438	0.0062685
CDIF630erm_00875	[gene=CD630DERM_07570]		-0.12	-0.22	-0.42	-0.27	0.114383	0.35835	0.000123959	0.00421812
CDIF630erm_00876	[gene=CD630DERM_07580]	pflA	0.03	-0.52	-0.61	-0.59	0.750375	0.0629552	2.96439e-05	0.000372803
CDIF630erm_00877	[gene=CD630DERM_07590]	plfB	0.35	-1.12	-1.08	-0.54	0.0390348	0.111067	1.10805e-05	0.00123809
CDIF630erm_00878	[gene=CD630DERM_07600]		0.02	-0.06	-0.04	0	0.308989	0.997814	0.19085	0.019022
CDIF630erm_00879	[gene=CD630DERM_07610]	cshA1	-0.75	-0.78	-0.29	-0.58	0.00522754	0.0338329	0.00260667	3.79379e-05
CDIF630erm_00880	[gene=CD630DERM_07620]	srlR	-0.07	0.03	0.19	0.11	0.0575318	0.563134	0.000195252	0.00100083
CDIF630erm_00881	[gene=CD630DERM_07630]	srlM	-0.15	-0.14	-0.07	0.06	0.00383942	0.470282	0.959431	0.0120837
CDIF630erm_00882	[gene=CD630DERM_07640]	srlA	0.05	0.5	1.37	0.93	0.268561	0.244879	7.41025e-06	2.27749e-05
CDIF630erm_00883	[gene=CD630DERM_07650]	srlEa	-0.03	0.18	0.2	0.1	0.227561	0.369128	0.00062887	0.00252159
CDIF630erm_00884	[gene=CD630DERM_07660]	srlEb	0.07	0.16	0.27	0.23	0.0156498	0.233878	8.10745e-05	3.43962e-05
CDIF630erm_00885	[gene=CD630DERM_07670]	srlB	0	0.06	0.4	0.28	0.214686	0.401536	0.000215484	0.000703032
CDIF630erm_00886	[gene=CD630DERM_07680]	srlD	0.21	0.4	1.1	0.75	0.00424497	0.215134	1.87217e-05	3.87284e-05
CDIF630erm_00887	[gene=CD630DERM_07690]		-0.02	-0.05	0.45	0.54	0.901279	0.678599	0.000551717	0.000842077
CDIF630erm_00888	[gene=CD630DERM_07700]	spoIIAA	0.2	0.11	-0.09	-0.02	0.0238489	0.750742	0.223347	0.372104
CDIF630erm_00889	[gene=CD630DERM_07710]	spoIIAB	0.37	0.35	-0.24	-0.25	0.00531667	0.279905	0.00397992	0.000254506
CDIF630erm_00890	[gene=CD630DERM_07720]	sigF	0.36	0.22	-0.05	0.04	0.00663762	0.573209	0.386084	0.142335
CDIF630erm_00891	[gene=CD630DERM_07730]	spoVAC	0	0.07	0.27	0.19	0.494159	0.448706	0.000115639	0.000298558
CDIF630erm_00892	[gene=CD630DERM_07740]	spoVAD	0.12	0.24	0.49	0.43	0.00250625	0.184866	1.66378e-05	2.71269e-05
CDIF630erm_00893	[gene=CD630DERM_07750]	spoVAE	-0.01	0.1	0.19	0.12	0.908703	0.318226	0.00028611	0.000696142
CDIF630erm_00894	[gene=CD630DERM_07760]		0.46	0.27	-0.51	-0.01	0.00321084	0.510399	7.15148e-05	0.582795
CDIF630erm_00895	[gene=CD630DERM_07770]		0.1	0.19	0.64	0.67	0.00489987	0.236487	1.34588e-05	1.34375e-05
CDIF630erm_00896	[gene=CD630DERM_07780]		0.05	0.13	0.16	0.14	0.044306	0.257227	0.000405931	0.000246722
CDIF630erm_00897	[gene=CD630DERM_07790]		0.09	0.23	0.2	0.2	0.00681466	0.16276	0.000330202	0.0100588
CDIF630erm_00898	[gene=CD630DERM_07800]		0.1	0.27	0.23	0.52	0.00424717	0.142429	0.000348483	5.77081e-05
CDIF630erm_00899	[gene=CD630DERM_07810]		-0.21	-0.23	0.06	-0.35	0.00216037	0.173702	0.039598	0.000166683
CDIF630erm_00900	[gene=CD630DERM_07820]	yunB	-0.06	0.02	0.12	0.09	0.120921	0.650775	0.00107468	0.000816425
CDIF630erm_00901	[gene=CD630DERM_07830]	spoIVB2	0.01	0.11	0.23	0.19	0.288108	0.312041	7.34123e-05	0.000137898
CDIF630erm_00902	[gene=CD630DERM_07840]		0.28	0.1	0.27	1.28	0.00194902	0.405319	0.000192711	0.0015756
CDIF630erm_00904	[gene=CD630DERM_07850]		-0.78	-0.93	-0.41	-0.81	0.00235349	0.0369775	0.000101929	3.5633e-05
CDIF630erm_00905	[gene=CD630DERM_07860]		-0.45	-0.4	-0.43	-0.41	0.00117314	0.098846	0.000889926	7.13049e-05
CDIF630erm_00906	[gene=CD630DERM_07870]		-0.08	-0.17	-0.34	-0.43	0.273681	0.363763	0.000204374	9.73294e-05
CDIF630erm_00907	[gene=CD630DERM_07880]		0.05	0.4	0.81	0.35	0.688803	0.222984	0.00105451	0.0434746
CDIF630erm_00908	[gene=CD630DERM_07890]		0.37	0.74	0.53	0.06	0.0259334	0.158145	0.0166081	0.0632729
CDIF630erm_00909	[gene=CD630DERM_07900]		0.68	1.53	0.44	0.37	0.00948946	0.069367	0.250968	0.877193
CDIF630erm_00910	[gene=CD630DERM_07910]		0.21	0.44	1.32	0.85	0.0172148	0.19866	6.92756e-05	0.000629897
CDIF630erm_00911	[gene=CD630DERM_07920]		0.08	0.31	0.95	0.71	0.111329	0.242876	2.78725e-05	5.34049e-05
CDIF630erm_00912	[gene=CD630DERM_07930]		0.04	0.39	1.17	0.8	0.173708	0.247422	4.78631e-05	5.71082e-05
CDIF630erm_00913	[gene=CD630DERM_07940]	nadE	0.15	-0.09	-0.19	-0.38	0.39713	0.373083	0.00136156	0.000209242
CDIF630erm_00914	[gene=CD630DERM_07950]		-0.11	0.02	0.94	0.04	0.00317119	0.19866	0.821454	7.36506e-05
CDIF630erm_00915	[gene=CD630DERM_07960]		0.09	0.56	1.79	1.37	0.419932	0.184866	8.88656e-06	1.27914e-05
CDIF630erm_00916	[gene=CD630DERM_07970]		0	0.08	0.57	0.45	0.556344	0.421845	2.40128e-05	2.80292e-05
CDIF630erm_00917	[gene=CD630DERM_07980]		0.08	-0.03	0.26	0.26	0.0100986	0.632589	4.12174e-05	4.42652e-05
CDIF630erm_00918	[gene=CD630DERM_07990]		0.04	0.07	0.96	0.57	0.0317397	0.312202	8.68655e-05	0.000481415
CDIF630erm_00919	[gene=CD630DERM_08000]	crt1	0.02	0.09	0.52	0.72	0.027999	0.470798	1.38471e-05	4.51709e-05
CDIF630erm_00920	[gene=CD630DERM_08010]		0.08	0.08	0.25	0.22	0.0131992	0.420948	4.38283e-05	9.93873e-05
CDIF630erm_00921	[gene=CD630DERM_08020]		0.08	0.27	0.42	0.23	0.0232053	0.19866	5.87333e-05	8.46773e-05
CDIF630erm_00922	[gene=CD630DERM_08030]	acrC	0.11	0.23	0.35	0.3	0.0035637	0.197043	0.000399279	3.06504e-05
CDIF630erm_00923	[gene=CD630DERM_08040]	etfB2	0.59	0.57	0.48	0.49	0.00221557	0.0644115	8.57126e-05	0.000590279
CDIF630erm_00924	[gene=CD630DERM_08050]	etfA2	0.03	0.04	-0.08	-0.04	0.25399	0.542792	0.753983	0.095329
CDIF630erm_00925	[gene=CD630DERM_08060]		0.06	0.19	0.71	0.56	0.0638269	0.257728	6.33236e-05	6.99064e-05
CDIF630erm_00926	[gene=CD630DERM_08070]		0.42	-0.14	-0.69	-0.64	0.00581777	0.317009	3.55944e-05	1.46118e-05
	[gene=CD630DERM_08080]		0.12	0.09	-0.05	0.07	0.0224827	0.83939	0.131971	0.0758752
CDIF630erm_00927	[gene=CD630DERM_08090]		-0.15	-0.4	-0.41	-0.31	0.0032239	0.125552	2.22632e-05	0.00014718
CDIF630erm_00928	[gene=CD630DERM_08100]	floX	0.38	0.59	0.51	0.65	0.0108549	0.215738	0.0798375	0.0161939
CDIF630erm_00929	[gene=CD630DERM_08110]		0.31	0.33	-0.09	0.24	0.0185658	0.654373	0.00239394	0.128433
CDIF630erm_00930	[gene=CD630DERM_08120]		0.27	0.62	0.3	-0.26	0.115035	0.393579	0.0045699	0.000365835
CDIF630erm_00931	[gene=CD630DERM_08130]		-0.1	0.12	-0.98	-0.99	0.169807	0.584	7.21764e-05	1.71167e-05
CDIF630erm_00932	[gene=CD630DERM_08140]		0.03	-0.08	-0.27	-0.16	0.224228	0.711712	0.000672233	0.0289003
CDIF630erm_00933	[gene=CD630DERM_08150]		0.1	0.1	0.29	0.27	0.00521308	0.363763	0.00015326	5.72316e-05
CDIF630erm_00934	[gene=CD630DERM_08160]	bglF1	0.89	-0.01	-0.02	0.58	0.00364068	0.856346	0.301283	0.0027948
CDIF630erm_00935	[gene=CD630DERM_08170]	tlpB1	0.14	-0.34	-0.61	-0.08	0.613907	0.238752	3.68274e-05	0.047616
	[gene=CD630DERM_08171]	tlpB	0.17	-0.43	-0.74	-0.19	0.540624	0.228208	0.000503587	0.0108957
CDIF630erm_00936	[gene=CD630DERM_08180]	bglC	0.53	0.55	0.66	0.71	0.0175504	0.179254	9.21013e-05	0.00109543
CDIF630erm_00937	[gene=CD630DERM_08190]		0.4	0	-0.06	0.21	0.109307	0.750827	0.00761745	0.377048
CDIF630erm_00938	[gene=CD630DERM_08200]		-0.09	0.63	1.11	0.93	0.0289317	0.238752	2.23936e-05	1.781e-05
CDIF630erm_00939	[gene=CD630DERM_08210]		-0.06	0.03	0.13	0.06	0.0453041	0.889208	0.677868	0.586657
CDIF630erm_00940	[gene=CD630DERM_08220]		-0.06	0.1	0.53	0.37	0.209678	0.359144	0.000102975	0.000156025
CDIF630erm_00942	[gene=CD630DERM_08230]		-0.01	0.03	0.41	0.3	0.929886	0.478174	0.000180922	0.000128671
CDIF630erm_00943	[gene=CD630DERM_08240]		-0.06	-0.06	-0.06	-0.15	0.340937	0.997814	0.675909	0.00874143
CDIF630erm_00944	[gene=CD630DERM_08250]	rbr1	-0.28	0.81	0.62	0.26	0.00159755	0.173365	0.000109732	3.87284e-05
CDIF630erm_00945	[gene=CD630DERM_08260]	perR	-0.14	1.51	0.36	0.36	0.00314905	0.352103	0.00013692	4.18798e-05
CDIF630erm_00946	[gene=CD630DERM_08270]	dsr	-0.29	1.58	0.46	0.14	0.00188274	0.352566	7.32603e-05	3.09276e-05
CDIF630erm_00947	[gene=CD630DERM_08280]		0.24	0.63	0.04	0.12	0.0823732	0.529536	0.000342208	0.000104814
CDIF630erm_00948	[gene=CD630DERM_08290]		0.01	0.13	-0.25	-0.22	0.852773	0.912653	0.000279282	0.000440933
CDIF630erm_00949	[gene=CD630DERM_08300]		1.12	0.73	0.54	1.54	0.00195352	0.127033	0.00211527	2.59045e-05
CDIF630erm_00950	[gene=CD630DERM_08310]	cshA2	-0.12	0.24	0.95	0.72	0.00373553	0.721807	7.34123e-05	0.000226362
CDIF630erm_00951	[gene=CD630DERM_08320]	aksA	0.43	0.68	1.1	0.52	0.00424497	0.0705255	2.34835e-05	0.00399775
CDIF630erm_00952	[gene=CD630DERM_08330]	acnB	0.44	0.7	0.95	0.71	0.00353735	0.0855139	9.42701e-06	5.24991e-05
CDIF630erm_00953	[gene=CD630DERM_08340]	icd	0.44	0.99	1.47	0.83	0.00724223	0.0891322	0.000234925	0.000130935
CDIF630erm_00954	[gene=CD630DERM_08350]		0.15	-0.12	-0.44	-0.62	0.0135439	0.505119	0.000359661	1.64396e-05
CDIF630erm_00955	[gene=CD630DERM_08360]		0.24	-0.09	-0.65	-0.53	0.00389598	0.548988	1.40455e-05	1.83345e-05
CDIF630erm_00956	[gene=CD630DERM_08370]		0.45	0.58	-0.34	-0.41	0.0023655	0.286171	0.000787527	5.2334e-05
CDIF630erm_00957	[gene=CD630DERM_08380]		0.52	0.59	-0.77	-0.46	0.00246245	0.535549	1.87326e-05	0.000309388
CDIF630erm_00958	[gene=CD630DERM_08390]		0.47	0.42	-0.81	-0.66	0.00216556	0.536308	4.33467e-05	0.000120684
CDIF630erm_00959	[gene=CD630DERM_08400]		1.23	1.44	0.1	0.05	0.00235325	0.0538891	0.133564	0.268184
CDIF630erm_00960	[gene=CD630DERM_08410]	purH*	0.9	1.71	1.41	0.5	0.00456365	0.036725	4.17798e-05	0.118621
CDIF630erm_00961	[gene=CD630DERM_08420]		-0.11	-0.31	0.08	-0.23	0.0556863	0.230084	0.335508	0.00675155
CDIF630erm_00962	[gene=CD630DERM_08430]		-0.06	-0.25	-0.47	-0.4	0.153861	0.274534	0.000145515	7.18968e-05
CDIF630erm_00963	[gene=CD630DERM_08440]	cwp25	0.07	-0.05	-0.21	-0.53	0.621909	0.371931	8.16289e-05	2.70686e-05
CDIF630erm_00964	[gene=CD630DERM_08450]		-0.04	-0.04	0.24	0.32	0.225106	0.91439	9.873e-05	8.23195e-05
CDIF630erm_00965	[gene=CD630DERM_08460]		0.05	-0.13	-0.33	-0.28	0.0659886	0.485498	0.000419472	0.00026952
CDIF630erm_00966	[gene=CD630DERM_08470]		0.01	-0.04	-0.13	-0.06	0.592117	0.874978	0.487422	0.886775
CDIF630erm_00967	[gene=CD630DERM_08480]		0.16	0.06	-0.04	-0.11	0.00527675	0.634946	0.130478	0.247143
CDIF630erm_00968	[gene=CD630DERM_08490]		0.71	0.96	1.53	0.98	0.00107157	0.061339	1.10805e-05	0.000147754
CDIF630erm_00969	[gene=CD630DERM_08500]		0.65	0.62	0.34	-0.07	0.00283513	0.264117	0.429454	0.00350727
CDIF630erm_00970	[gene=CD630DERM_08510]		-0.06	-0.13	0.08	-0.04	0.210882	0.846373	0.0303958	0.185114
CDIF630erm_00971	[gene=CD630DERM_08520]		-0.12	-0.14	-0.17	-0.21	0.0182136	0.409111	0.0433887	0.00499615
CDIF630erm_00972	[gene=CD630DERM_08530]	oppB	0.79	0.64	0.89	1.84	0.00179055	0.401797	0.00662335	0.000175917
CDIF630erm_00973	[gene=CD630DERM_08540]	oppC	0.82	0.6	0.74	1.78	0.00137549	0.697436	0.101768	0.000349824
CDIF630erm_00974	[gene=CD630DERM_08550]	oppA	1.13	1.14	0.98	2.18	0.00179055	0.18879	0.0767379	0.000168981
CDIF630erm_00975	[gene=CD630DERM_08560]	oppD	1.16	1.51	1.26	2.27	0.00129553	0.0262968	0.000223442	1.27914e-05
CDIF630erm_00980	[gene=CD630DERM_08600]		0.02	0.35	0.69	0.46	0.201833	0.192571	1.40448e-05	1.44179e-05
CDIF630erm_00981	[gene=CD630DERM_08610]		-0.01	0.07	0.46	0.28	0.818502	0.434977	4.02947e-05	6.84223e-05
CDIF630erm_00982	[gene=CD630DERM_08620]		0.08	0.16	0.39	0.25	0.00723837	0.26157	2.52024e-05	9.16036e-05
CDIF630erm_00983	[gene=CD630DERM_08630]		-0.07	-0.04	0.35	0.12	0.0265158	0.940043	8.27471e-05	0.0116361
CDIF630erm_00984	[gene=CD630DERM_08640]	malH1	0.01	0.51	1.05	0.64	0.689499	0.217676	1.76018e-05	0.000165076
CDIF630erm_00985	[gene=CD630DERM_08650]		0.53	1.23	0.22	-0.05	0.0359505	0.117904	0.00241041	0.361929
CDIF630erm_00986	[gene=CD630DERM_08660]		0.36	0.92	0.36	0.25	0.0406548	0.173214	0.00622285	0.0727942
CDIF630erm_00987	[gene=CD630DERM_08670]		-0.07	-0.04	0.11	0.07	0.00911235	0.907285	0.00213016	0.00519461
CDIF630erm_00988	[gene=CD630DERM_08680]		-0.13	-0.32	-0.26	-0.19	0.0126281	0.173661	0.00079191	0.000851836
CDIF630erm_00989	[gene=CD630DERM_08690]	modA	0.07	0.29	0.6	0.42	0.746882	0.492017	0.0570258	0.0119385
CDIF630erm_00990	[gene=CD630DERM_08700]	modB	-0.3	-0.33	-0.1	-0.18	0.00082627	0.16276	0.263538	0.0009012
CDIF630erm_00991	[gene=CD630DERM_08710]	modC	-0.31	-0.15	-0.01	0	0.00113354	0.614537	0.360936	0.358359
CDIF630erm_00992	[gene=CD630DERM_08720]	maa1	-0.23	0.33	1.18	0.87	0.00156299	0.554402	1.84254e-05	4.38337e-05
CDIF630erm_00993	[gene=CD630DERM_08730]		0.92	1.05	-1.34	-1.14	0.000674721	0.642506	2.94234e-05	8.43674e-05
CDIF630erm_00994	[gene=CD630DERM_08740]		0.76	0.2	-1.03	-0.99	0.000933422	0.650557	2.55774e-05	4.18148e-05
CDIF630erm_00995	[gene=CD630DERM_08750]		0.85	-0.17	-0.83	-0.76	0.000430793	0.491725	7.33501e-05	0.000284991
CDIF630erm_00996	[gene=CD630DERM_08760]		0.2	0.18	0.07	-0.04	0.00235865	0.188965	0.00330101	0.20692
CDIF630erm_00997	[gene=CD630DERM_08770]		0.58	0.31	-0.15	-0.33	0.000575575	0.745873	0.000514949	6.84223e-05
CDIF630erm_00998	[gene=CD630DERM_08780]		0.84	-0.11	-0.66	-0.74	0.00060789	0.514134	3.81678e-05	0.000276895
CDIF630erm_00999	[gene=CD630DERM_08790]	nnr	0.18	0.03	0.25	0.22	0.180737	0.635497	0.398022	0.00780237
CDIF630erm_01000	[gene=CD630DERM_08800]		0.5	0.51	0.18	1.26	0.00446239	0.229849	0.889782	8.76959e-06
CDIF630erm_01001	[gene=CD630DERM_08810]		0.48	0.98	0.86	1.9	0.011006	0.10689	0.000556411	0.000122646
CDIF630erm_01002	[gene=CD630DERM_08820]	glgC	0.94	1.95	1.05	1.01	0.00287235	0.0504756	3.81839e-05	8.39585e-06
CDIF630erm_01003	[gene=CD630DERM_08830]	glgD	0.79	1.59	0.31	0.41	0.00196848	0.0594494	0.000670516	2.80842e-05
CDIF630erm_01004	[gene=CD630DERM_08840]	glgA	1.05	1.57	-0.18	-0.01	0.0026134	0.104795	0.00960761	0.410577
CDIF630erm_01005	[gene=CD630DERM_08850]	glgP	0.92	1.52	0.32	0.4	0.00194242	0.0369775	0.00286848	0.000176434
CDIF630erm_01006	[gene=CD630DERM_08860]	amyB	0.69	0.6	-0.37	-0.27	0.00378716	0.212722	0.000176216	0.000405096
CDIF630erm_01007	[gene=CD630DERM_08870]		-0.45	0.08	1.28	1.28	0.00082627	0.648582	6.70797e-05	5.38079e-05
CDIF630erm_01008	[gene=CD630DERM_08880]	speA1	-1.58	-1.57	-1.02	-2.14	0.000558032	0.0171051	2.94234e-05	7.56288e-06
CDIF630erm_01009	[gene=CD630DERM_08890]	speH	-1.57	-1.57	-0.99	-2.17	0.000681076	0.00878929	1.55529e-05	9.63249e-06
CDIF630erm_01010	[gene=CD630DERM_08900]	speE	-1.5	-1.55	-1.27	-2.67	0.00086753	0.00877271	5.9541e-06	6.65977e-06
CDIF630erm_01011	[gene=CD630DERM_08910]	speB	-1.44	-1.49	-1.64	-2.91	0.00115124	0.00667052	4.84729e-06	7.08073e-06
CDIF630erm_01012	[gene=CD630DERM_08920]	cspA	-0.83	-2.08	-1.97	-1.65	0.00950155	0.109606	0.000129371	0.000136696
CDIF630erm_01013	[gene=CD630DERM_08930]		0.09	-0.4	-0.02	0.26	0.911108	0.150063	0.00288987	0.0039226
CDIF630erm_01014	[gene=CD630DERM_08940]		0.29	-0.04	0.13	0.31	0.00327252	0.463601	0.22588	0.0160902
CDIF630erm_01015	[gene=CD630DERM_08950]		0.26	0.29	0.23	0.52	0.0105784	0.491421	0.808243	0.00364811
CDIF630erm_01016	[gene=CD630DERM_08960]		0.3	0.29	0.09	0.71	0.0134457	0.728989	0.00692108	0.00293041
CDIF630erm_01017	[gene=CD630DERM_08970]		-0.2	-0.54	-0.97	-0.92	0.0147307	0.17087	1.27371e-05	1.03323e-05
CDIF630erm_01018	[gene=CD630DERM_08980]		-0.06	0.52	1.26	0.8	0.0210969	0.259761	0.000735949	6.74155e-05
CDIF630erm_01019	[gene=CD630DERM_08990]	dinB	0	-0.01	0.14	0.08	0.408912	0.777515	0.000792691	0.00294092
CDIF630erm_01020	[gene=CD630DERM_09000]	opuCA	-0.31	-0.23	-0.04	-0.07	0.0100568	0.328355	0.705502	0.308138
CDIF630erm_01021	[gene=CD630DERM_09010]	opuCC	-0.39	-0.23	-0.16	-0.11	0.044694	0.246526	0.114865	0.149572
CDIF630erm_01022	[gene=CD630DERM_09020]		0.01	0.29	1.16	1.19	0.251714	0.251237	4.80238e-05	7.0673e-05
CDIF630erm_01024	[gene=CD630DERM_09040]		-0.02	-0.19	-0.36	-0.42	0.766456	0.331628	8.602e-05	4.61614e-05
CDIF630erm_01026	[gene=CD630DERM_09050]		0.13	-0.24	-0.53	-0.54	0.0100002	0.33197	0.000127096	2.29376e-05
CDIF630erm_01027	[gene=CD630DERM_09060]		-0.06	-0.1	-0.03	-0.11	0.0930472	0.596544	0.216653	0.101698
CDIF630erm_01029	[gene=CD630DERM_09070]		-0.01	-0.08	-0.37	-0.43	0.976911	0.635196	0.000160364	0.000310923
CDIF630erm_01030	[gene=CD630DERM_09071]		0.01	0.02	0.06	0.14	0.191048	0.643083	0.101343	0.000272158
CDIF630erm_01031	[gene=CD630DERM_09080]		0.02	0.11	0.19	0.14	0.312366	0.270344	0.000387973	9.28221e-05
CDIF630erm_01032	[gene=CD630DERM_09090]		0.05	0.08	0.14	0.12	0.0301532	0.422394	0.00396983	0.000418072
CDIF630erm_01033	[gene=CD630DERM_09100]		0.03	-0.15	-0.18	-0.24	0.681244	0.337906	0.00133693	0.000254506
CDIF630erm_01034	[gene=CD630DERM_09110]		-0.04	0.01	0.09	0.12	0.327753	0.777515	0.0614907	0.000290976
CDIF630erm_01035	[gene=CD630DERM_09120]		-0.14	-0.13	-0.01	-0.02	0.00566853	0.50683	0.0417438	0.195466
CDIF630erm_01036	[gene=CD630DERM_09130]		0.03	-0.03	0.06	0.09	0.19998	0.985384	0.0833355	0.00306509
CDIF630erm_01037	[gene=CD630DERM_09140]		-0.1	-0.15	-0.11	-0.12	0.00285064	0.377906	0.411608	0.0240746
CDIF630erm_01038	[gene=CD630DERM_09150]		0.03	0.51	0.85	0.8	0.631462	0.247356	2.54877e-05	3.63225e-05
CDIF630erm_01039	[gene=CD630DERM_09160]		0.06	0.01	-0.03	0	0.0683202	0.710204	0.798788	0.070883
CDIF630erm_01040	[gene=CD630DERM_09170]		0.07	0.16	0.29	0.23	0.00792046	0.242284	5.11304e-05	0.000179624
CDIF630erm_01041	[gene=CD630DERM_09180]		0.01	0.08	0.24	0.17	0.148858	0.370452	0.00010097	0.000104667
CDIF630erm_01042	[gene=CD630DERM_09190]		-0.02	0.04	0.15	0.14	0.639336	0.554078	0.000690826	0.00034606
CDIF630erm_01043	[gene=CD630DERM_09200]		-0.09	-0.1	-0.08	-0.08	0.0234598	0.728574	0.612913	0.624297
CDIF630erm_01044	[gene=CD630DERM_09210]		-0.15	-0.17	-0.14	-0.15	0.00696913	0.378159	0.018703	0.00177378
CDIF630erm_01045	[gene=CD630DERM_09220]		0.02	0.05	0.08	0.03	0.238067	0.492172	0.0118771	0.00818646
CDIF630erm_01046	[gene=CD630DERM_09230]		0.05	0.37	1.02	0.82	0.137982	0.19888	1.66863e-05	2.31215e-05
CDIF630erm_01047	[gene=CD630DERM_09231]		-0.38	-0.34	0.11	0.3	0.000855996	0.109131	0.00696559	0.000211107
CDIF630erm_01048	[gene=CD630DERM_09240]		-0.13	-0.07	-0.02	-0.05	0.00257258	0.856864	0.131721	0.693164
CDIF630erm_01049	[gene=CD630DERM_09241]		-0.26	-0.24	-0.07	0.01	0.000988197	0.213297	0.860707	0.0255696
CDIF630erm_01050	[gene=CD630DERM_09250]		-0.07	-0.13	0.06	0.03	0.0231811	0.654373	0.0134704	0.0151365
CDIF630erm_01051	[gene=CD630DERM_09260]		0.01	0.18	0.15	0.06	0.566141	0.293378	0.000616869	0.00162993
CDIF630erm_01052	[gene=CD630DERM_09270]		0.07	0.5	1.19	1.01	0.0325901	0.270715	0.000367137	1.27914e-05
CDIF630erm_01053	[gene=CD630DERM_09280]		-0.1	-0.08	0	-0.01	0.0116391	0.617722	0.913188	0.9501
CDIF630erm_01054	[gene=CD630DERM_09290]		-0.01	-0.01	0.21	0.34	0.787124	0.749571	0.000114885	0.000506067
CDIF630erm_01055	[gene=CD630DERM_09300]		0.09	0.19	0.34	0.27	0.00698298	0.195802	2.29436e-05	4.48105e-05
CDIF630erm_01056	[gene=CD630DERM_09301]		-0.32	-0.39	0.08	-0.09	0.000459342	0.0879642	0.209802	0.479638
CDIF630erm_01057	[gene=CD630DERM_09310]		0.01	0.37	1.07	0.93	0.620949	0.216608	1.80775e-05	1.56661e-05
CDIF630erm_01058	[gene=CD630DERM_09320]		-0.13	0.08	0.13	0.07	0.00294821	0.511647	0.000636395	0.00152821
CDIF630erm_01059	[gene=CD630DERM_09330]		-0.16	-0.11	0.05	0	0.00534365	0.728574	0.0256685	0.118193
CDIF630erm_01060	[gene=CD630DERM_09340]		-0.06	-0.13	-0.02	0	0.197811	0.533297	0.669206	0.196726
	[gene=CD630DERM_09341]		-0.06	-0.13	0	-0.08	0.0687133	0.37378	0.55382	0.0787997
CDIF630erm_01061	[gene=CD630DERM_09350]		0.01	0.15	0.71	0.57	0.229706	0.317017	2.79588e-05	3.79379e-05
CDIF630erm_01062	[gene=CD630DERM_09360]		0.05	0.07	0.46	0.36	0.0372516	0.446215	4.38474e-05	3.89721e-05
CDIF630erm_01063	[gene=CD630DERM_09370]		0.04	0.38	0.82	0.78	0.167601	0.19888	2.33564e-05	1.55058e-05
CDIF630erm_01064	[gene=CD630DERM_09380]		-0.04	0.37	1.04	0.61	0.0262613	0.437573	2.81591e-05	0.00017346
CDIF630erm_01065	[gene=CD630DERM_09390]		0.57	1.33	1.05	1.55	0.00706189	0.109131	0.00131195	6.21644e-05
CDIF630erm_01066	[gene=CD630DERM_09400]		0.2	0.79	0.78	0.58	0.222958	0.133733	0.000596657	0.000563056
CDIF630erm_01067	[gene=CD630DERM_09401]		0.03	-0.04	0.07	0.01	0.329203	0.889155	0.0111379	0.0626127
CDIF630erm_01068	[gene=CD630DERM_09410]		0.75	1.51	0.01	0.46	0.00171024	0.0702871	0.475461	5.24991e-05
CDIF630erm_01069	[gene=CD630DERM_09420]		0.83	2.33	1.54	1.31	0.00304001	0.0445367	3.89845e-05	0.000597214
CDIF630erm_01070	[gene=CD630DERM_09430]		-0.02	0.03	0.13	0.07	0.500116	0.598354	0.000651784	0.00165546
CDIF630erm_01071	[gene=CD630DERM_09440]		0.01	0.07	0.1	0.11	0.229158	0.368726	0.000586378	0.000239412
CDIF630erm_01072	[gene=CD630DERM_09450]		-0.01	0.09	0.2	0.12	0.835643	0.37776	0.000103164	0.000180304
CDIF630erm_01073	[gene=CD630DERM_09460]		0.04	0.1	0.21	0.23	0.030357	0.311401	7.70631e-05	8.43104e-05
CDIF630erm_01074	[gene=CD630DERM_09461]		-0.01	0.08	0	0.03	0.795584	0.421532	0.016365	0.00745655
CDIF630erm_01075	[gene=CD630DERM_09470]		-0.06	0.02	0.38	0.29	0.0255668	0.695044	7.70694e-05	7.13049e-05
CDIF630erm_01076	[gene=CD630DERM_09480]		0.04	0.18	0.7	0.47	0.0965834	0.296125	1.58834e-05	2.65831e-05
CDIF630erm_01077	[gene=CD630DERM_09490]		-0.07	-0.06	0.02	0.09	0.00928881	0.902479	0.0710172	0.00944538
CDIF630erm_01078	[gene=CD630DERM_09500]		0.05	0.04	0.05	0.12	0.0382888	0.517292	0.0109002	0.00100827
CDIF630erm_01079	[gene=CD630DERM_09510]		0.03	0.13	0.55	0.62	0.183161	0.326886	2.67772e-05	1.85326e-05
CDIF630erm_01080	[gene=CD630DERM_09520]		-0.06	0.34	1.01	0.79	0.0657708	0.255351	1.40448e-05	0.000137794
CDIF630erm_01081	[gene=CD630DERM_09530]		-0.27	-0.22	-0.01	0.03	0.000681076	0.391667	0.0819046	0.0566108
CDIF630erm_01082	[gene=CD630DERM_09531]		-0.12	-0.16	-0.03	-0.02	0.00316816	0.524	0.622102	0.802865
CDIF630erm_01083	[gene=CD630DERM_09540]		0.09	0.24	0.4	0.33	0.00971943	0.193646	2.55774e-05	3.03702e-05
CDIF630erm_01084	[gene=CD630DERM_09550]		-0.03	0.04	0.15	0.09	0.206078	0.543779	0.00252088	0.00053013
CDIF630erm_01085	[gene=CD630DERM_09560]		0.02	0.08	0.19	0.16	0.124727	0.368221	0.00120784	0.00033373
	[gene=CD630DERM_09561]		-0.31	0.08	0.62	0.93	0.00235325	0.510826	2.31295e-05	8.75563e-05
CDIF630erm_01087	[gene=CD630DERM_09562]		-0.2	0.69	0.67	0.02	0.043888	0.477802	0.832754	0.111394
CDIF630erm_01088	[gene=CD630DERM_09570]		-0.01	0.19	-0.17	0.11	0.213767	0.837544	0.00138037	0.392053
CDIF630erm_01090	[gene=CD630DERM_09580]		-0.01	0.04	-0.16	-0.11	0.12171	0.477255	0.000148632	0.000549886
CDIF630erm_01091	[gene=CD630DERM_09590]		0	0.14	0.63	0.47	0.428171	0.270584	2.03749e-05	2.67042e-05
CDIF630erm_01094	[gene=CD630DERM_09600]		0.06	0.22	0.59	0.44	0.0274525	0.197745	1.57577e-05	2.93042e-05
CDIF630erm_01095	[gene=CD630DERM_09610]		-0.01	0.3	1.08	0.5	0.88645	0.317198	1.40448e-05	2.90568e-05
CDIF630erm_01096	[gene=CD630DERM_09620]		-0.02	0.03	0.45	0.16	0.0812881	0.500248	0.000120419	0.00242837
CDIF630erm_01097	[gene=CD630DERM_09630]		-0.01	0.02	0.21	0.27	0.855922	0.595398	0.000758216	3.43962e-05
CDIF630erm_01098	[gene=CD630DERM_09640]		-0.07	0.15	0.81	0.7	0.157439	0.30416	0.000174204	2.80842e-05
CDIF630erm_01099	[gene=CD630DERM_09650]		-0.05	0.04	0.14	0.14	0.215135	0.508428	0.00616834	0.000190067
CDIF630erm_01100	[gene=CD630DERM_09660]		0.02	0.26	0.49	0.76	0.20894	0.227124	0.000188456	1.27914e-05
CDIF630erm_01101	[gene=CD630DERM_09670]		0.25	0.24	0.5	0.78	0.00123816	0.203439	0.000128274	2.46579e-05
CDIF630erm_01102	[gene=CD630DERM_09680]		0.07	0.39	0.94	0.67	0.0371133	0.230084	2.847e-05	5.24991e-05
CDIF630erm_01103	[gene=CD630DERM_09690]		-0.07	0.27	1.27	0.24	0.122076	0.281363	5.17371e-05	0.491056
CDIF630erm_01104	[gene=CD630DERM_09700]		-0.09	-0.01	0.27	0.06	0.0190183	0.842126	0.000199295	0.00375062
CDIF630erm_01105	[gene=CD630DERM_09710]		0.03	-0.01	0.19	0.12	0.16254	0.647096	0.000180223	0.00041006
CDIF630erm_01106	[gene=CD630DERM_09720]		0.08	0.53	1.52	1.16	0.0220727	0.184116	8.88656e-06	9.50674e-06
CDIF630erm_01107	[gene=CD630DERM_09730]		0.05	-0.01	0.07	0.04	0.0157433	0.874679	0.0049295	0.00714419
	[gene=CD630DERM_09740]		-0.05	0.03	0.05	0.06	0.0314506	0.635142	0.0124886	0.000851409
CDIF630erm_01108	[gene=CD630DERM_09750]		0.14	-0.12	-0.49	0.6	0.407024	0.311339	2.57761e-05	0.00482969
CDIF630erm_01109	[gene=CD630DERM_09760]		0.17	-0.15	-0.39	0.41	0.131025	0.284637	0.000121748	0.63584
CDIF630erm_01110	[gene=CD630DERM_09770]		0.16	-0.17	-0.13	0.24	0.410609	0.238957	4.94667e-05	0.00704188
	[gene=CD630DERM_09771]		0.03	-0.1	-0.64	-0.96	0.141231	0.221502	5.79148e-05	0.0117594
CDIF630erm_01111	[gene=CD630DERM_09772]		0.11	1.59	-0.26	0.02	0.247488	0.439088	0.0016557	0.232692
CDIF630erm_01113	[gene=CD630DERM_09780]		-0.06	-0.07	-0.02	-0.04	0.0397259	0.68558	0.781499	0.75939
CDIF630erm_01114	[gene=CD630DERM_09790]		0.08	0.04	0	0.02	0.00582508	0.523616	0.0392399	0.00543005
CDIF630erm_01116	[gene=CD630DERM_09810]		-0.21	-0.26	-0.22	-0.3	0.00415362	0.181785	0.00494984	0.000202523
CDIF630erm_01117	[gene=CD630DERM_09820]	ubiA	-0.28	-0.46	-0.48	-0.58	0.00239091	0.106168	5.29362e-05	2.33949e-05
CDIF630erm_01118	[gene=CD630DERM_09830]		-0.26	-0.2	-0.16	-0.32	0.00241671	0.228925	0.000260362	7.11754e-05
CDIF630erm_01119	[gene=CD630DERM_09840]		-0.12	0.06	0.25	0.02	0.00675619	0.909067	0.0298265	0.0129655
CDIF630erm_01120	[gene=CD630DERM_09850]		-0.18	-0.27	0.22	0.19	0.00431238	0.167931	0.603937	0.0945063
CDIF630erm_01121	[gene=CD630DERM_09860]	rpsA	-0.26	-0.71	-0.46	-0.72	0.00128367	0.101097	2.33564e-05	8.09535e-06
CDIF630erm_01122	[gene=CD630DERM_09870]		0.01	-0.07	-0.12	-0.18	0.839336	0.657463	0.0155863	0.000973603
CDIF630erm_01123	[gene=CD630DERM_09880]		-0.13	-0.39	-0.63	-0.61	0.0129993	0.15181	1.57894e-05	0.000353116
CDIF630erm_01125	[gene=CD630DERM_09890]	leuA	0.23	0.34	0.34	0.27	0.0163842	0.0904496	4.02947e-05	0.000129527
CDIF630erm_01126	[gene=CD630DERM_09900]	leuC	0.24	0.49	0.23	0.25	0.0353477	0.0502264	0.000498711	0.00323547
CDIF630erm_01127	[gene=CD630DERM_09910]	leuD	0.18	0.21	0.06	0.04	0.0215338	0.164176	0.00236176	0.00163704
CDIF630erm_01128	[gene=CD630DERM_09920]	leuB	0.29	0.44	0.23	0.12	0.0147782	0.0445367	9.70156e-05	0.000372581
CDIF630erm_01129	[gene=CD630DERM_09930]		0.56	0.31	0.82	-0.14	0.0127483	0.681421	0.0033081	0.00320152
CDIF630erm_01130	[gene=CD630DERM_09940]		5	3.95	0.89	1.11	0.000539199	0.0116002	0.000926036	0.000641438
CDIF630erm_01131	[gene=CD630DERM_09950]	hpr	5.48	3.78	0.01	0.59	0.000493173	0.0945888	0.209021	0.0116604
CDIF630erm_01132	[gene=CD630DERM_09960]		5.13	4.03	0.82	0.76	0.000543567	0.0262968	7.39421e-05	0.003319
CDIF630erm_01133	[gene=CD630DERM_09970]		-0.3	-0.29	-0.24	-0.32	0.0042597	0.152688	0.00727421	0.000141534
CDIF630erm_01134	[gene=CD630DERM_09980]		-0.49	-0.42	-0.07	-0.28	0.00101943	0.0924002	0.0249784	0.000513152
CDIF630erm_01135	[gene=CD630DERM_09990]		-0.26	0.09	-0.07	-0.28	0.00121352	0.658312	0.00879003	7.82378e-05
CDIF630erm_01136	[gene=CD630DERM_10000]		-0.04	0.4	1.34	0.7	0.0431731	0.354813	1.55222e-05	8.92488e-05
CDIF630erm_01137	[gene=CD630DERM_10010]		-0.22	-0.24	-0.22	-0.3	0.00234882	0.167939	0.0072243	0.000112605
CDIF630erm_01138	[gene=CD630DERM_10020]		-0.04	0.1	0.75	0.45	0.386039	0.685754	0.000123957	0.00150263
CDIF630erm_01139	[gene=CD630DERM_10030]	fumA	-0.98	-0.35	1.14	0.46	0.000716126	0.341431	7.16522e-05	0.373459
CDIF630erm_01140	[gene=CD630DERM_10040]	fumB	-0.99	-0.64	-0.13	-0.61	0.00082627	0.0282944	2.23936e-05	2.54288e-05
CDIF630erm_01141	[gene=CD630DERM_10050]	ytsJ	-1.26	-1	-0.35	-1.06	0.00060789	0.0171051	3.15105e-05	1.06675e-05
CDIF630erm_01142	[gene=CD630DERM_10060]		-0.44	-0.13	-0.01	0.28	0.00151246	0.654669	0.571435	0.52693
CDIF630erm_01143	[gene=CD630DERM_10070]		-0.42	-0.38	-0.48	-0.68	0.00372	0.133733	0.000138842	1.05884e-05
CDIF630erm_01144	[gene=CD630DERM_10080]		-0.07	-0.18	-0.24	-0.31	0.112618	0.354972	0.00136156	0.000198558
CDIF630erm_01145	[gene=CD630DERM_10090]		-1.46	-0.85	-0.13	-0.54	0.000424463	0.0448214	0.000183329	0.000107067
CDIF630erm_01146	[gene=CD630DERM_10100]	nagA1	-1.34	-0.61	0.05	-0.43	0.000430793	0.211158	0.229871	2.86985e-05
CDIF630erm_01147	[gene=CD630DERM_10110]	nagB	-1.81	-1.04	-0.27	-0.89	0.000391069	0.0370572	0.000175731	1.23607e-05
CDIF630erm_01148	[gene=CD630DERM_10120]		-0.03	0.12	0.2	0.2	0.397134	0.342118	0.000327901	9.31008e-05
CDIF630erm_01149	[gene=CD630DERM_10130]		0.05	0.02	0.22	0.22	0.0441944	0.657463	0.000807712	0.000344421
CDIF630erm_01150	[gene=CD630DERM_10140]		0	0.01	0.16	0.13	0.318003	0.602261	0.00105074	0.000692005
CDIF630erm_01151	[gene=CD630DERM_10150]		-0.04	-0.17	-0.15	-0.11	0.457455	0.369082	0.0332121	0.0733247
CDIF630erm_01152	[gene=CD630DERM_10160]		-0.09	-0.05	-0.02	-0.07	0.0120844	0.985021	0.030709	0.819454
CDIF630erm_01153	[gene=CD630DERM_10170]		-0.01	0.18	1.07	0.8	0.874308	0.273503	5.1253e-06	0.000208506
CDIF630erm_01154	[gene=CD630DERM_10180]		-0.05	0.03	0.17	0.12	0.165715	0.561423	0.000278164	0.00017093
CDIF630erm_01155	[gene=CD630DERM_10190]		0	0.05	0.15	0.14	0.399839	0.521218	0.000744686	0.00035451
CDIF630erm_01156	[gene=CD630DERM_10200]		0.12	0.14	0.24	0.23	0.0021652	0.220177	9.62942e-05	0.000169836
CDIF630erm_01157	[gene=CD630DERM_10210]		0.03	0.15	0.42	0.42	0.19644	0.258242	2.40128e-05	3.31237e-05
CDIF630erm_01158	[gene=CD630DERM_10220]		0.29	-0.03	-0.04	0.38	0.00276931	0.595117	0.140736	0.000329392
CDIF630erm_01159	[gene=CD630DERM_10230]		-1.23	-0.7	-0.32	-0.96	0.00117314	0.0679102	0.00278799	0.00025388
CDIF630erm_01160	[gene=CD630DERM_10240]	potA	-1.22	-0.58	0.18	-0.66	0.00199539	0.111067	0.615995	0.00545413
CDIF630erm_01161	[gene=CD630DERM_10250]	potB	-1.37	-0.73	-0.19	-0.8	0.00257568	0.0629552	0.00219508	0.000539679
CDIF630erm_01162	[gene=CD630DERM_10260]	potC	-1.44	-0.82	-0.4	-0.97	0.0038334	0.0679102	0.000781516	0.00033927
CDIF630erm_01163	[gene=CD630DERM_10270]	potD	-1.54	-0.97	-0.38	-1.13	0.00427542	0.0370572	0.00153247	0.000693539
CDIF630erm_01164	[gene=CD630DERM_10280]		0.02	0.08	0.2	0.16	0.23042	0.400962	9.55756e-05	0.000104058
CDIF630erm_01165	[gene=CD630DERM_10290]		-0.05	0.02	0.16	0.12	0.214538	0.643253	0.000444872	0.000480996
CDIF630erm_01166	[gene=CD630DERM_10300]	ydaM	0.03	-0.09	0.02	0.03	0.375358	0.77284	0.0214717	0.00633247
CDIF630erm_01167	[gene=CD630DERM_10310]		0.03	0.16	0.25	0.26	0.090949	0.257324	0.000267655	0.00224473
CDIF630erm_01168	[gene=CD630DERM_10320]		0.12	0.16	0.15	0.14	0.00320573	0.208061	0.000258623	0.000215616
CDIF630erm_01169	[gene=CD630DERM_10330]	mnaA	0.12	0.16	0.21	0.17	0.00518094	0.216869	0.000267364	7.11989e-05
CDIF630erm_01170	[gene=CD630DERM_10340]		0.11	0.4	0.75	0.56	0.00606405	0.205452	5.20948e-05	5.0367e-05
CDIF630erm_01175	[gene=CD630DERM_10350]	cwp16	0.04	-0.01	0.18	0.17	0.613272	0.931483	0.42622	0.153769
CDIF630erm_01176	[gene=CD630DERM_10360]	cwp17	0.04	-0.02	0.16	0.15	0.843514	0.895097	0.054178	0.00173407
CDIF630erm_01177	[gene=CD630DERM_10370]		-0.04	-0.13	-0.14	-0.25	0.649428	0.495882	0.100354	0.00211692
CDIF630erm_01178	[gene=CD630DERM_10380]		0.15	0.29	0.66	0.15	0.0178381	0.19866	0.000332872	0.301348
CDIF630erm_01179	[gene=CD630DERM_10390]		0.2	-0.08	-0.38	-0.28	0.00377823	0.632206	0.000359113	0.000136003
CDIF630erm_01180	[gene=CD630DERM_10400]	addB	0.41	0.06	-0.3	-0.17	0.000543567	0.97557	0.000621532	0.00303095
CDIF630erm_01181	[gene=CD630DERM_10410]	addA	0.36	0.59	1.25	0.94	0.00218013	0.109705	1.16769e-05	1.8249e-05
CDIF630erm_01182	[gene=CD630DERM_10420]	sbcD	0.34	0.39	0.32	0.24	0.00122773	0.0879642	7.69707e-05	0.000159434
CDIF630erm_01183	[gene=CD630DERM_10430]	sbcC	0.34	0.24	-0.17	-0.27	0.00171024	0.300555	0.00828624	0.00122015
CDIF630erm_01184	[gene=CD630DERM_10440]		0.44	0.25	-0.15	0.29	0.00532814	0.964364	0.00644294	0.102149
CDIF630erm_01185	[gene=CD630DERM_10450]		0.03	-0.08	0.03	0.03	0.0995144	0.999408	0.0075137	0.00189804
CDIF630erm_01186	[gene=CD630DERM_10460]	pepT1	-0.23	-0.29	-0.2	-0.32	0.00195208	0.193635	0.0033319	8.85453e-05
CDIF630erm_01187	[gene=CD630DERM_10470]	cwp18	0.55	0.21	0.27	0.56	0.00273826	0.367273	0.0129208	0.000402459
CDIF630erm_01188	[gene=CD630DERM_10480]		0.01	0.04	0.08	-0.17	0.223591	0.922057	0.0712649	0.00446122
CDIF630erm_01189	[gene=CD630DERM_10490]	ppnK	0.08	-0.17	-0.19	-0.14	0.713177	0.303265	0.000727725	0.00261743
CDIF630erm_01190	[gene=CD630DERM_10500]		1.02	0.21	0.45	1.84	0.00167888	0.845382	0.00190817	1.67158e-05
CDIF630erm_01191	[gene=CD630DERM_10510]		0.94	0.02	-0.44	0.57	0.00086753	0.734069	0.000701661	0.00242016
CDIF630erm_01192	[gene=CD630DERM_10520]		1.06	0.26	-0.08	0.82	0.00086516	0.834678	0.0245559	0.00149261
CDIF630erm_01193	[gene=CD630DERM_10530]		1.32	0.67	0.15	1.1	0.000681076	0.337657	0.369488	0.00213543
CDIF630erm_01194	[gene=CD630DERM_10540]	bcd	2.66	2.08	1.76	2.07	0.000977885	0.187743	0.00513564	0.000183315
CDIF630erm_01195	[gene=CD630DERM_10550]	etfB3	2.48	2.43	1.65	1.76	0.00107	0.0538891	0.00462962	0.00134343
CDIF630erm_01196	[gene=CD630DERM_10560]	etfA3	2.76	3.3	1.95	2.24	0.00086753	0.0103526	0.000426722	0.000374109
CDIF630erm_01197	[gene=CD630DERM_10570]	crt2	2.77	3.59	2.51	2.41	0.000804955	0.00552717	6.76836e-05	0.000219409
CDIF630erm_01198	[gene=CD630DERM_10580]	hbd	2.96	4.14	2.08	2.28	0.00086753	0.00412884	0.000382264	0.00121118
CDIF630erm_01199	[gene=CD630DERM_10590]	thlA1	3.09	4.96	2.56	2.62	0.000889286	0.00412884	0.000165242	0.000368219
CDIF630erm_01200	[gene=CD630DERM_10600]		0.07	0.12	-0.11	-0.22	0.178491	0.437239	0.0659388	0.00177485
CDIF630erm_01201	[gene=CD630DERM_10610]		0.09	0.11	-0.53	-0.62	0.217996	0.874835	1.96665e-05	1.71167e-05
CDIF630erm_01202	[gene=CD630DERM_10620]	acpP1	-0.68	-1.45	-1.45	-2.05	0.00307394	0.056364	6.63201e-06	1.29007e-05
CDIF630erm_01203	[gene=CD630DERM_10630]		-0.04	0.05	0.1	0.07	0.0595072	0.519048	0.000670155	0.00145974
CDIF630erm_01204	[gene=CD630DERM_10631]		-0.01	-0.04	0.16	0.29	0.574574	0.946069	0.0183758	0.000121464
CDIF630erm_01205	[gene=CD630DERM_10632]		0.12	1.04	2.29	1.72	0.0338532	0.16276	4.7372e-06	1.91698e-05
CDIF630erm_01206	[gene=CD630DERM_10633]		0.03	0.47	1.44	1.02	0.679359	0.362682	8.20348e-06	3.00249e-05
CDIF630erm_01207	[gene=CD630DERM_10640]	ccpA	-0.38	-0.59	-0.06	0.29	0.00365383	0.0445367	0.000360318	0.378667
CDIF630erm_01208	[gene=CD630DERM_10650]		0.03	0.08	0.52	0.43	0.141734	0.402791	4.5783e-05	2.42716e-05
CDIF630erm_01209	[gene=CD630DERM_10660]		-0.08	-0.03	0.27	0.16	0.0271033	0.870774	0.000301763	0.000406752
CDIF630erm_01211	[gene=CD630DERM_10670]	cdeC	0.03	0.28	0.48	0.47	0.165838	0.19866	0.000104737	2.64853e-05
CDIF630erm_01212	[gene=CD630DERM_10680]		-0.07	-0.02	0.09	-0.03	0.0345024	0.895257	0.00484579	0.116206
CDIF630erm_01213	[gene=CD630DERM_10690]		-0.18	-0.16	0.24	-0.02	0.0354694	0.959199	0.00117346	0.727443
CDIF630erm_01214	[gene=CD630DERM_10700]		-0.2	-0.48	-0.69	-0.77	0.0118073	0.144344	2.0779e-05	9.57283e-06
CDIF630erm_01215	[gene=CD630DERM_10710]		-0.36	-0.75	-1.01	-1.21	0.000804955	0.105302	4.93546e-06	3.93139e-06
CDIF630erm_01216	[gene=CD630DERM_10720]	apeA	-0.29	-0.54	-0.33	-0.77	0.000879161	0.12194	0.000206392	2.25833e-05
CDIF630erm_01217	[gene=CD630DERM_10730]		-0.12	-0.01	0.5	0.16	0.0645485	0.710204	0.000167794	0.00221452
CDIF630erm_01218	[gene=CD630DERM_10740]		-0.08	0	-0.15	-0.31	0.209229	0.790602	0.0674297	0.00621138
CDIF630erm_01219	[gene=CD630DERM_10750]		-0.02	0.11	0.72	0.52	0.75442	0.435092	5.21318e-05	0.00441716
CDIF630erm_01220	[gene=CD630DERM_10760]		-0.09	-0.09	-0.1	-0.16	0.14407	0.797088	0.78382	0.0429672
CDIF630erm_01221	[gene=CD630DERM_10770]		0.07	0.65	1.58	1.14	0.233741	0.194949	1.00897e-05	2.7658e-05
CDIF630erm_01222	[gene=CD630DERM_10780]		0	-0.04	0.05	-0.06	0.797963	0.787846	0.00480523	0.898154
CDIF630erm_01223	[gene=CD630DERM_10790]		0	0.12	0.16	0.15	0.714406	0.352424	0.00412665	0.0143378
CDIF630erm_01224	[gene=CD630DERM_10800]		-0.88	-0.54	-0.33	-0.43	0.000391069	0.059897	4.02947e-05	2.54288e-05
CDIF630erm_01225	[gene=CD630DERM_10810]	moeA	-0.07	-0.17	0.26	-0.03	0.0479649	0.387018	0.58269	0.000139786
CDIF630erm_01226	[gene=CD630DERM_10820]	mobB	-0.15	-0.44	-0.65	-0.76	0.0055239	0.152688	1.32314e-05	6.44543e-06
CDIF630erm_01227	[gene=CD630DERM_10830]		-0.1	0.08	0.34	-0.01	0.0568214	0.950472	0.891888	0.00242016
CDIF630erm_01228	[gene=CD630DERM_10840]	ywjA	0.68	-0.09	-0.14	0.14	0.0153371	0.470798	0.000576731	0.487114
CDIF630erm_01229	[gene=CD630DERM_10850]		1.08	0.75	-0.46	-1.07	0.00234761	0.589696	1.85796e-05	1.44179e-05
CDIF630erm_01230	[gene=CD630DERM_10860]		0.98	0.67	-0.67	-1.55	0.00352891	0.923013	9.7684e-05	3.44809e-05
CDIF630erm_01231	[gene=CD630DERM_10870]	zupT	-0.02	0.32	1.07	0.71	0.807797	0.183042	2.69634e-05	1.61815e-05
CDIF630erm_01232	[gene=CD630DERM_10880]		-0.13	-0.17	-0.17	-0.21	0.00962545	0.336533	0.0703999	0.00126878
CDIF630erm_01233	[gene=CD630DERM_10890]	rgbR	-0.1	-0.09	0.64	0.05	0.0248102	0.695044	0.00027156	0.0235973
CDIF630erm_01234	[gene=CD630DERM_10900]	int1	0.47	0.93	0.68	1.29	0.00588165	0.0500768	0.000120966	1.8026e-05
CDIF630erm_01235	[gene=CD630DERM_10910]	int2	0.25	0.98	0.51	0.57	0.00256387	0.105302	2.40128e-05	2.47148e-05
CDIF630erm_01237	[gene=CD630DERM_10921]		0.37	0.96	0.56	0.75	0.00206023	0.1035	1.87217e-05	2.46579e-05
	[gene=CD630DERM_10940]		0.3	1.06	1.06	1.03	0.00211547	0.0921246	2.77416e-05	3.08599e-05
CDIF630erm_01238	[gene=CD630DERM_10950]		-0.07	0.11	0.03	-0.19	0.119318	0.42864	0.43543	0.00458168
CDIF630erm_01239	[gene=CD630DERM_10960]		-0.04	-0.02	0.09	-0.2	0.28621	0.737618	0.0315985	0.00145974
CDIF630erm_01240	[gene=CD630DERM_10970]		-0.06	0.18	0.19	-0.01	0.244653	0.270584	0.00145204	0.469092
CDIF630erm_01241	[gene=CD630DERM_10980]		0.3	0.68	1.24	1.25	0.00259044	0.0921246	8.88397e-06	1.09768e-05
CDIF630erm_01242	[gene=CD630DERM_10990]		0.16	0.49	1.22	0.99	0.00341565	0.157225	1.52116e-05	2.74924e-05
	[gene=CD630DERM_10991]		0.14	0.29	0.32	0.24	0.0118777	0.146143	0.000125326	8.03541e-05
CDIF630erm_01243	[gene=CD630DERM_11000]		0.11	0.28	0.5	0.39	0.0037793	0.149678	1.47593e-05	7.14358e-05
CDIF630erm_01244	[gene=CD630DERM_11010]		0.13	0.42	0.86	0.8	0.00293909	0.148697	1.25887e-05	2.79587e-05
CDIF630erm_01245	[gene=CD630DERM_11020]		0.08	0.23	0.7	0.43	0.0289584	0.216608	2.33564e-05	2.51752e-05
CDIF630erm_01246	[gene=CD630DERM_11030]		0.16	0.22	0.14	0.59	0.144456	0.454379	0.431209	0.000108876
	[gene=CD630DERM_11031]		0.14	0.28	0.41	0.52	0.111187	0.313662	0.000737233	0.000312069
CDIF630erm_01247	[gene=CD630DERM_11040]		0	-0.07	-0.44	-0.06	0.449904	0.451248	0.000100926	0.0105508
CDIF630erm_01248	[gene=CD630DERM_11041]		0.14	0.48	0.64	0.79	0.00315077	0.125924	4.12174e-05	9.52387e-06
CDIF630erm_01249	[gene=CD630DERM_11042]		-0.01	0.07	0.42	0.31	0.90072	0.451408	5.28718e-05	5.08063e-05
CDIF630erm_01250	[gene=CD630DERM_11050]		0.01	0.44	0.84	0.34	0.465608	0.235564	1.14854e-05	0.000240863
CDIF630erm_01251	[gene=CD630DERM_11060]	topB	0.17	0.36	0.65	0.47	0.002039	0.153391	1.30812e-05	2.00277e-05
	[gene=CD630DERM_11061]		0.13	0.6	1.88	1.37	0.0163842	0.281363	3.52564e-05	3.6139e-05
CDIF630erm_01252	[gene=CD630DERM_11070]		0.09	0.17	0.69	0.51	0.00968658	0.319312	1.58834e-05	2.03855e-05
CDIF630erm_01253	[gene=CD630DERM_11071]		-0.04	0.24	0.52	0.67	0.454555	0.247422	0.000268921	1.57392e-05
CDIF630erm_01254	[gene=CD630DERM_11080]		0.06	0.48	0.91	0.79	0.0391146	0.157068	1.00025e-05	1.79412e-05
CDIF630erm_01255	[gene=CD630DERM_11090]		0.14	0.43	0.66	0.63	0.00226893	0.123245	1.29809e-05	1.27914e-05
CDIF630erm_01256	[gene=CD630DERM_11100]		0.02	0.15	0.32	0.31	0.186721	0.26923	0.000295124	2.76933e-05
CDIF630erm_01257	[gene=CD630DERM_11110]		0.04	0.25	0.59	0.42	0.0900551	0.199774	3.68274e-05	3.79379e-05
CDIF630erm_01258	[gene=CD630DERM_11120]		0.15	0.25	0.45	0.38	0.0024955	0.170732	2.07548e-05	2.06608e-05
	[gene=CD630DERM_11130]		0.07	0.24	0.4	0.43	0.0114193	0.22238	0.000897276	2.42522e-05
	[gene=CD630DERM_11140]		-0.04	0.13	0.52	0.5	0.356363	0.340421	4.80238e-05	2.78095e-05
CDIF630erm_01259	[gene=CD630DERM_11150]		0.16	0.22	0.52	0.49	0.00933099	0.242284	2.23523e-05	1.54943e-05
CDIF630erm_01260	[gene=CD630DERM_11160]		0.06	0.24	0.48	0.42	0.0586117	0.179254	1.83075e-05	2.72394e-05
CDIF630erm_01261	[gene=CD630DERM_11170]		0.05	0.46	1.42	1.06	0.0747061	0.238752	9.56212e-06	2.42716e-05
CDIF630erm_01262	[gene=CD630DERM_11180]		0.11	0.27	0.58	0.48	0.00907381	0.167317	1.00897e-05	2.00277e-05
CDIF630erm_01263	[gene=CD630DERM_11190]		-0.04	-0.07	0.03	0.03	0.072487	0.957012	0.00984664	0.00430669
CDIF630erm_01264	[gene=CD630DERM_11200]	pflD	0.1	0.14	-0.07	0.07	0.0874867	0.325409	0.866738	0.315812
CDIF630erm_01265	[gene=CD630DERM_11210]	pflC	0.26	0.28	0.24	0.23	0.00785287	0.165291	0.00459247	0.111779
CDIF630erm_01266	[gene=CD630DERM_11220]		0.05	0.03	-0.2	-0.09	0.183049	0.894561	0.00840965	0.0477343
CDIF630erm_01267	[gene=CD630DERM_11230]		0.09	0.53	1.16	0.95	0.0369146	0.197498	4.81024e-05	2.58193e-05
CDIF630erm_01268	[gene=CD630DERM_11240]		0.25	0.03	0.14	0.44	0.00188274	0.729188	0.809713	0.000202626
CDIF630erm_01269	[gene=CD630DERM_11241]		-0.09	-0.07	-0.56	-0.15	0.00948946	0.501488	7.74206e-05	0.01191
CDIF630erm_01270	[gene=CD630DERM_11250]		1.69	1.32	1.36	2.6	0.00271568	0.102749	0.0140103	0.000402196
CDIF630erm_01271	[gene=CD630DERM_11260]		-0.02	-0.13	0.03	0.14	0.911045	0.615395	0.924632	0.149805
CDIF630erm_01272	[gene=CD630DERM_11261]		-0.02	-0.13	-0.23	-0.25	0.76288	0.885347	0.918933	0.115569
CDIF630erm_01273	[gene=CD630DERM_11270]		0.1	-0.07	-0.19	-0.21	0.0189203	0.82332	0.0195321	0.0016338
CDIF630erm_01275	[gene=CD630DERM_11280]	polA	-0.24	-0.27	-0.38	-0.48	0.0125987	0.233647	0.000755372	1.82775e-05
CDIF630erm_01276	[gene=CD630DERM_11290]	coaE	-0.33	-0.24	0	-0.18	0.00316214	0.212722	0.000319451	0.000266336
CDIF630erm_01277	[gene=CD630DERM_11300]		-0.24	-0.06	-0.19	-0.28	0.00408711	0.239118	0.000119602	0.000101393
CDIF630erm_01278	[gene=CD630DERM_11310]		-0.26	-0.46	-0.68	-0.73	0.0115312	0.173466	1.57533e-05	1.44179e-05
CDIF630erm_01279	[gene=CD630DERM_11320]	copZ	0.04	0.1	-0.88	-1.14	0.612237	0.721595	4.82145e-06	3.93139e-06
CDIF630erm_01280	[gene=CD630DERM_11330]		-0.26	-0.37	-0.61	-0.73	0.00469847	0.14733	2.51632e-05	2.59732e-05
CDIF630erm_01281	[gene=CD630DERM_11340]	gloA	-0.28	-0.48	-0.63	-0.63	0.0129528	0.134078	8.88656e-06	9.6205e-05
CDIF630erm_01282	[gene=CD630DERM_11350]		-0.01	0.02	0.35	-0.05	0.0113849	0.114337	0.00117699	0.000152066
CDIF630erm_01283	[gene=CD630DERM_11360]		-0.04	0.01	0.08	0.38	0.430667	0.639668	0.00162375	0.000249032
CDIF630erm_01284	[gene=CD630DERM_11370]	rnfC	-0.14	0.22	-0.13	-0.81	0.009998	0.686536	4.02206e-05	2.28477e-05
CDIF630erm_01285	[gene=CD630DERM_11380]	rnfD	-0.12	0.36	0.2	-0.64	0.00859758	0.789495	0.00259378	2.6286e-05
CDIF630erm_01286	[gene=CD630DERM_11390]	rnfG	-0.06	0.53	-0.58	-0.99	0.0144852	0.429688	1.57021e-05	1.05974e-05
CDIF630erm_01287	[gene=CD630DERM_11400]	rnfE	-0.13	0.43	-0.52	-0.91	0.00496086	0.506855	9.41326e-06	1.06675e-05
CDIF630erm_01288	[gene=CD630DERM_11410]	rnfA	-0.07	0.66	-0.02	-0.73	0.0130393	0.299126	0.000449972	1.05974e-05
CDIF630erm_01289	[gene=CD630DERM_11420]	rnfB	0.08	0.98	-0.44	-1.12	0.35749	0.254089	1.87217e-05	5.40512e-06
CDIF630erm_01290	[gene=CD630DERM_11430]		-0.67	-1.05	-0.83	-1.37	0.00449268	0.0610779	1.00025e-05	3.33234e-05
CDIF630erm_01291	[gene=CD630DERM_11440]	radC	-0.71	-0.98	-0.88	-1.3	0.00424497	0.0524818	2.36137e-05	2.31908e-05
CDIF630erm_01292	[gene=CD630DERM_11450]	mreB2	-0.49	-0.92	-0.46	-1.12	0.00166576	0.0769864	3.81839e-05	2.06703e-05
CDIF630erm_01293	[gene=CD630DERM_11460]	mreC	-0.3	-0.4	-0.1	-0.53	0.00228445	0.11701	7.94269e-05	2.51954e-05
CDIF630erm_01294	[gene=CD630DERM_11470]	mreD	-0.41	-0.69	-0.78	-0.99	0.00123816	0.13733	2.2651e-05	2.87442e-05
CDIF630erm_01295	[gene=CD630DERM_11480]		-0.4	-0.24	0.71	-0.01	0.00158185	0.105302	0.591829	0.000110007
CDIF630erm_01296	[gene=CD630DERM_11490]	minC	-0.19	-0.17	-0.42	-0.92	0.0031437	0.228505	2.16907e-05	5.90577e-06
CDIF630erm_01297	[gene=CD630DERM_11500]	minD	-0.16	0.06	-0.34	-0.94	0.00628256	0.294563	1.96665e-05	8.01447e-06
CDIF630erm_01298	[gene=CD630DERM_11510]	minE	-0.14	0.12	-0.8	-1.12	0.0230866	0.592023	5.04889e-06	6.69856e-06
CDIF630erm_01299	[gene=CD630DERM_11520]	mrdB	-0.36	0.07	0.38	-0.4	0.00205492	0.499038	0.821274	0.000133662
CDIF630erm_01300	[gene=CD630DERM_11530]	mgsA	-0.38	-0.23	-0.19	-0.51	0.00135824	0.191042	0.000279282	0.000116998
CDIF630erm_01301	[gene=CD630DERM_11540]		-0.19	-0.22	-0.2	-0.22	0.0021652	0.1843	0.00304556	0.000867631
CDIF630erm_01302	[gene=CD630DERM_11550]		-0.19	-0.28	-0.26	-0.2	0.00504897	0.146115	0.00505613	0.00262445
CDIF630erm_01303	[gene=CD630DERM_11560]		0.02	0.75	-0.68	-1.7	0.102935	0.503775	7.54908e-05	8.43025e-05
CDIF630erm_01304	[gene=CD630DERM_11570]	fprA	1.76	1.68	1.98	3.52	0.000681076	0.0705255	0.00319032	0.000126694
CDIF630erm_01305	[gene=CD630DERM_11580]		0.06	-0.21	-0.13	0.15	0.898621	0.26923	0.00246223	0.149398
CDIF630erm_01306	[gene=CD630DERM_11590]		0.04	-0.1	0.02	0.02	0.971749	0.441348	0.243522	0.234719
CDIF630erm_01307	[gene=CD630DERM_11600]	rng	0.02	-0.14	-0.28	-0.12	0.275647	0.327927	0.0005384	0.000916448
CDIF630erm_01308	[gene=CD630DERM_11610]	rplU	-0.25	-0.11	-0.51	0.58	0.101681	0.0950999	0.0107225	0.952936
CDIF630erm_01309	[gene=CD630DERM_11620]		-0.25	-0.3	-0.71	0.32	0.0322325	0.0679102	0.00472594	0.463691
CDIF630erm_01310	[gene=CD630DERM_11630]	rpmA	-0.29	-0.17	-0.66	0.41	0.0547676	0.0721691	0.00781967	0.638935
CDIF630erm_01311	[gene=CD630DERM_11640]	obgE	-0.39	-0.68	-0.28	0.13	0.00502853	0.0921246	0.00382466	0.340036
CDIF630erm_01312	[gene=CD630DERM_11650]		-0.5	-0.71	-0.51	-0.24	0.00378716	0.0887999	0.000701332	0.0766261
CDIF630erm_01314	[gene=CD630DERM_11660]	hom1	-0.17	0.25	1.04	0.77	0.0352288	0.347038	2.25711e-05	0.000234256
CDIF630erm_01315	[gene=CD630DERM_11670]		-0.08	-0.08	0	-0.07	0.0134284	0.743143	0.0756525	0.201859
CDIF630erm_01316	[gene=CD630DERM_11680]		0.06	0.07	0.29	0.22	0.0160564	0.422394	7.66085e-05	7.55208e-05
CDIF630erm_01317	[gene=CD630DERM_11690]		-0.15	-0.13	0.66	0.68	0.00725602	0.421845	0.00821478	0.00260303
CDIF630erm_01318	[gene=CD630DERM_11700]	larA	0.08	0.14	0.24	0.55	0.034752	0.233647	7.70694e-05	1.72417e-05
CDIF630erm_01319	[gene=CD630DERM_11710]	etfB4	-0.02	0.56	1.41	1.47	0.425542	0.233867	1.25591e-05	6.0384e-06
CDIF630erm_01320	[gene=CD630DERM_11720]	etfA4	0.18	0.27	0.17	0.78	0.00275059	0.140239	0.000218943	1.91961e-05
CDIF630erm_01321	[gene=CD630DERM_11730]		0.11	0.41	0.36	1.11	0.0134112	0.140239	4.86017e-05	1.18263e-05
CDIF630erm_01322	[gene=CD630DERM_11740]		-0.11	-0.05	-0.06	-0.14	0.0188109	0.951973	0.295138	0.0240236
CDIF630erm_01323	[gene=CD630DERM_11750]	ackA	-0.01	-0.06	-0.55	-1.17	0.0938064	0.151951	2.52402e-05	1.55348e-05
CDIF630erm_01324	[gene=CD630DERM_11760]		-0.49	-0.56	-1.48	-1.39	0.000852507	0.0445367	1.82923e-05	1.57591e-05
CDIF630erm_01325	[gene=CD630DERM_11761]	rpmF	-0.63	-0.67	-1.44	-1.47	0.00060789	0.0282944	6.037e-06	8.76959e-06
CDIF630erm_01326	[gene=CD630DERM_11770]	fapR	-0.95	-1.55	-1.1	-1.81	0.00857494	0.0282944	4.00028e-06	6.91452e-06
CDIF630erm_01327	[gene=CD630DERM_11780]	plsX	-0.86	-1.33	-0.17	-0.88	0.0118318	0.0262968	7.11495e-05	5.19276e-06
CDIF630erm_01328	[gene=CD630DERM_11790]	fabH	-0.93	-1.49	-0.82	-1.89	0.00702205	0.026068	4.93546e-06	3.93139e-06
CDIF630erm_01329	[gene=CD630DERM_11800]	fabK	-0.9	-1.4	-0.79	-1.78	0.00424497	0.0256266	7.45771e-06	4.93289e-06
CDIF630erm_01330	[gene=CD630DERM_11810]	fabD	-0.98	-1.61	-1.19	-2.2	0.00487736	0.0262968	4.82145e-06	3.96214e-06
CDIF630erm_01331	[gene=CD630DERM_11820]	fabG1	-1.08	-1.57	-0.99	-2.12	0.0037793	0.0181478	1.36022e-05	5.40512e-06
CDIF630erm_01332	[gene=CD630DERM_11830]	acpP2	-1.17	-2.15	-2.14	-3.1	0.002039	0.0350927	3.96213e-06	3.93139e-06
CDIF630erm_01333	[gene=CD630DERM_11840]	fabF	-1.12	-2.01	-1.92	-3.11	0.00181819	0.0293433	4.00028e-06	3.93139e-06
CDIF630erm_01334	[gene=CD630DERM_11850]		-0.06	-0.18	-0.12	-0.23	0.140219	0.390133	0.237932	0.000522787
CDIF630erm_01335	[gene=CD630DERM_11860]		-0.02	-0.17	-0.24	-0.26	0.926231	0.388035	0.00276608	0.000455971
CDIF630erm_01336	[gene=CD630DERM_11870]		0.1	0.64	1.6	1.47	0.0274069	0.153391	5.04889e-06	5.90577e-06
CDIF630erm_01337	[gene=CD630DERM_11880]		-0.13	-0.05	0.17	0.07	0.00367251	0.995628	0.000178178	0.0067202
CDIF630erm_01338	[gene=CD630DERM_11890]		0.04	0.3	1.04	1.02	0.0992351	0.227124	5.86896e-06	1.71167e-05
CDIF630erm_01339	[gene=CD630DERM_11900]		-0.3	-0.78	-0.68	-0.88	0.000905421	0.120315	7.21283e-06	7.03811e-05
CDIF630erm_01340	[gene=CD630DERM_11910]	fbp	-0.23	0.15	0.93	0.26	0.00203268	0.869103	0.000464757	0.303805
CDIF630erm_01341	[gene=CD630DERM_11920]	spoIIIAA	-0.06	0.13	0.29	0.25	0.0211415	0.364707	7.78313e-05	0.000143654
CDIF630erm_01342	[gene=CD630DERM_11930]	spoIIIAB	-0.03	0.34	0.99	0.87	0.344472	0.230084	1.12757e-05	2.06298e-05
CDIF630erm_01343	[gene=CD630DERM_11940]	spoIIIAC	-0.01	0.05	0.21	0.07	0.734829	0.455237	8.98119e-05	0.00123176
CDIF630erm_01344	[gene=CD630DERM_11950]	spoIIIAD	0.1	0.12	0.41	0.43	0.00498289	0.277294	2.81591e-05	1.18878e-05
CDIF630erm_01345	[gene=CD630DERM_11960]	spoIIIAE	0.05	0.13	0.23	0.19	0.0288333	0.264117	9.40334e-05	0.000104058
CDIF630erm_01346	[gene=CD630DERM_11970]	spoIIIAF	-0.08	0.22	0.68	1.2	0.0221079	0.352038	2.76623e-05	0.000126161
CDIF630erm_01347	[gene=CD630DERM_11980]	spoIIIAG	-0.09	0.43	1.29	1.09	0.0167827	0.238752	3.8223e-05	0.000223641
CDIF630erm_01348	[gene=CD630DERM_11990]	spoIIIAH	0	0.01	0.16	0.35	0.391648	0.716289	0.0464374	0.00017453
CDIF630erm_01349	[gene=CD630DERM_12000]		-0.04	-0.35	-0.64	-0.64	0.14678	0.232173	7.36977e-05	4.48105e-05
CDIF630erm_01350	[gene=CD630DERM_12010]	nusB	-0.32	-0.51	-0.48	-0.56	0.00235349	0.135266	1.47593e-05	7.21065e-05
CDIF630erm_01351	[gene=CD630DERM_12020]	gcp1	-0.27	-0.45	-0.54	-0.61	0.00283456	0.125924	6.37244e-05	1.20185e-05
CDIF630erm_01352	[gene=CD630DERM_12030]	xseA	-0.1	-0.22	-0.13	-0.24	0.0187146	0.233867	0.00134594	0.00184103
CDIF630erm_01353	[gene=CD630DERM_12040]	xseB	-0.26	-0.57	-0.91	-0.91	0.00754193	0.127855	1.18028e-05	9.63249e-06
CDIF630erm_01354	[gene=CD630DERM_12050]	ispA	-0.16	-0.2	0.05	-0.16	0.00818558	0.238957	0.017487	0.000192784
CDIF630erm_01355	[gene=CD630DERM_12060]		-0.2	-0.19	0.11	-0.03	0.00424497	0.233182	0.251964	0.00472394
CDIF630erm_01356	[gene=CD630DERM_12070]	dxs	-0.2	-0.23	-0.09	0.06	0.00453599	0.176456	0.000189944	0.00117169
CDIF630erm_01357	[gene=CD630DERM_12080]	yqxC	-0.12	-0.3	0.16	-0.01	0.0125519	0.142047	0.00516889	0.00118481
CDIF630erm_01358	[gene=CD630DERM_12090]	recN	-0.14	-0.46	-0.49	-0.66	0.0278087	0.15924	0.000109968	1.68925e-05
CDIF630erm_01359	[gene=CD630DERM_12100]		-0.29	-0.45	-0.26	-0.39	0.00171024	0.112409	0.000431986	2.42716e-05
CDIF630erm_01360	[gene=CD630DERM_12110]		0.07	-0.14	-0.29	-0.41	0.3978	0.40644	0.000664735	0.000137898
CDIF630erm_01361	[gene=CD630DERM_12120]	bltD	0.17	-0.25	-0.57	-0.33	0.0980138	0.34002	6.49599e-05	0.000580648
CDIF630erm_01362	[gene=CD630DERM_12130]	spoIVB1	0.04	-0.03	0.19	0.23	0.14678	0.970899	0.000329818	0.000103668
CDIF630erm_01363	[gene=CD630DERM_12140]	spo0A	0.5	0.38	-0.21	-0.4	0.00831815	0.838499	0.00015838	6.73401e-05
CDIF630erm_01364	[gene=CD630DERM_12150]		0.04	0.47	1.03	0.65	0.308841	0.370889	0.000385575	0.000335539
CDIF630erm_01365	[gene=CD630DERM_12160]		-0.1	-0.45	-0.63	-0.55	0.0127093	0.197043	8.88656e-06	0.00024266
CDIF630erm_01366	[gene=CD630DERM_12170]		-0.01	-0.39	-0.59	-0.51	0.0687777	0.222178	1.68944e-05	0.000215346
CDIF630erm_01367	[gene=CD630DERM_12180]		-0.03	-0.28	0.01	-0.36	0.0225186	0.200387	0.000469517	9.81902e-05
CDIF630erm_01368	[gene=CD630DERM_12190]		0	-0.08	0.14	0.16	0.0757277	0.448706	0.295153	0.0411747
CDIF630erm_01369	[gene=CD630DERM_12200]	nudF	-0.02	-0.19	-0.1	-0.52	0.0523368	0.240816	0.000222771	5.58454e-05
CDIF630erm_01370	[gene=CD630DERM_12210]		0.09	-0.17	-0.33	-0.31	0.0766209	0.334058	0.00312105	5.14869e-05
CDIF630erm_01371	[gene=CD630DERM_12220]		0.11	-0.17	-0.27	-0.45	0.128652	0.326886	0.000194903	4.61382e-05
CDIF630erm_01372	[gene=CD630DERM_12230]	deoB	0.18	0.02	0.3	0.08	0.076643	0.483677	0.0857251	0.0016338
CDIF630erm_01373	[gene=CD630DERM_12240]	pupG	0.08	0.15	0.74	0.3	0.988127	0.761304	0.00375529	0.0247415
CDIF630erm_01374	[gene=CD630DERM_12250]	pdp	0.05	-0.01	0.3	0.2	0.108409	0.838488	0.00225615	0.202704
CDIF630erm_01375	[gene=CD630DERM_12260]		0.17	-0.08	-0.29	-0.07	0.0183303	0.536831	0.000505606	0.234387
CDIF630erm_01376	[gene=CD630DERM_12270]		0.66	-0.29	-0.56	0.29	0.0163842	0.283198	3.34675e-05	0.18692
CDIF630erm_01377	[gene=CD630DERM_12280]	yrrO	0.81	-0.06	0.26	0.98	0.0132538	0.482218	0.465264	0.00072946
CDIF630erm_01378	[gene=CD630DERM_12290]		0.23	0.11	0.04	0.07	0.0544204	0.326864	0.0109002	0.0628509
CDIF630erm_01379	[gene=CD630DERM_12300]	sigK	-0.04	-0.06	-0.04	0.07	0.709518	0.97763	0.182953	0.000980427
CDIF630erm_01380	[gene=CD630DERM_12310]		0.02	-0.01	0.12	0.2	0.682674	0.719298	0.0298317	0.000208701
CDIF630erm_01381	[gene=CD630DERM_12320]		0.24	0.01	-0.31	-0.17	0.00221557	0.883253	0.00136108	0.00701116
CDIF630erm_01382	[gene=CD630DERM_12330]	cwp26_1	0.35	0.65	-0.1	-0.12	0.00630654	0.124938	0.521396	0.0969889
	[gene=CD630DERM_12331]		0.27	2.01	0.59	0	0.215397	0.189327	0.633853	0.271016
	[gene=CD630DERM_12332]		-0.1	-0.19	-0.07	-0.11	1	0.774083	0.85511	0.904111
CDIF630erm_01383	[gene=CD630DERM_12333]		-0.11	-0.09	0.05	-0.02	0.0221079	0.689882	0.0447775	0.215637
	[gene=CD630DERM_12334]		-0.23	-0.39	-0.17	-0.14	0.00296747	0.167633	0.109711	0.0185174
CDIF630erm_01384	[gene=CD630DERM_12340]		-0.1	-0.01	0.53	0.58	0.0402469	0.775359	6.62414e-05	2.74924e-05
CDIF630erm_01385	[gene=CD630DERM_12341]		-0.08	-0.21	-0.02	-0.01	0.270853	0.22763	0.54648	0.923684
CDIF630erm_01386	[gene=CD630DERM_12350]		-0.08	-0.1	-0.09	0	0.0889449	0.579759	0.843456	0.0688387
CDIF630erm_01387	[gene=CD630DERM_12371]		0.02	0.05	0.07	0.03	0.409323	0.504493	0.0183063	0.038494
CDIF630erm_01388	[gene=CD630DERM_12380]		-0.1	-0.09	-0.11	-0.15	0.021911	0.532631	0.0990244	0.0135745
CDIF630erm_01389	[gene=CD630DERM_12381]		-0.02	0.05	0.08	0.07	0.467805	0.479337	0.0339698	0.00298131
CDIF630erm_01390	[gene=CD630DERM_12390]		-0.13	-0.1	0.12	-0.01	0.00732158	0.832452	0.00248981	0.148423
CDIF630erm_01391	[gene=CD630DERM_12400]	vanZ	-0.17	-0.22	-0.15	-0.28	0.0348796	0.230249	0.0375426	0.00250217
CDIF630erm_01392	[gene=CD630DERM_12401]		-0.68	-0.79	-0.84	-0.59	0.000543567	0.0401231	8.88656e-06	0.00101151
CDIF630erm_01394	[gene=CD630DERM_12420]		-0.05	-0.12	0	-0.02	0.231935	0.602543	0.709822	0.840385
CDIF630erm_01395	[gene=CD630DERM_12430]		-0.13	-0.17	-0.1	-0.08	0.00738708	0.313688	0.118483	0.0840222
CDIF630erm_01396	[gene=CD630DERM_12440]		-0.09	-0.02	0.08	-0.01	0.00644083	0.923013	0.00194551	0.0315191
CDIF630erm_01397	[gene=CD630DERM_12450]		-0.11	-0.1	-0.06	-0.1	0.00971357	0.588033	0.956228	0.091881
CDIF630erm_01398	[gene=CD630DERM_12460]	efp	-0.24	-0.72	-0.83	-1.53	0.000916961	0.104795	4.82145e-06	3.93139e-06
CDIF630erm_01399	[gene=CD630DERM_12470]		-0.58	-0.06	-0.99	-1.57	0.000879161	0.181785	1.40353e-05	1.27914e-05
CDIF630erm_01400	[gene=CD630DERM_12480]	rnc	-0.05	0.25	1.16	0.58	0.0273219	0.401833	0.000177041	0.000890082
CDIF630erm_01401	[gene=CD630DERM_12490]		-0.03	-0.13	-0.27	-0.35	0.168501	0.389442	7.70694e-05	6.36525e-05
CDIF630erm_01402	[gene=CD630DERM_12500]	smc	-0.09	0.13	1.03	0.69	0.0212069	0.391059	0.054822	0.19159
CDIF630erm_01403	[gene=CD630DERM_12510]	ftsY	-0.15	-0.44	-0.89	-0.96	0.00950155	0.205774	5.04889e-06	1.68925e-05
CDIF630erm_01404	[gene=CD630DERM_12511]		-0.59	-0.85	-0.97	-0.85	0.00082627	0.112409	5.87652e-06	0.000437734
CDIF630erm_01405	[gene=CD630DERM_12520]	ffh	-0.68	-0.76	-0.55	-0.66	0.00109067	0.0551595	8.88656e-06	5.17471e-05
CDIF630erm_01406	[gene=CD630DERM_12530]	rpsP	-0.71	-0.52	-1.33	-1.57	0.00101576	0.0445367	6.19153e-06	8.82067e-06
CDIF630erm_01407	[gene=CD630DERM_12540]		-0.61	-0.25	-0.73	-1.3	0.000677874	0.0450512	8.43252e-06	8.76959e-06
CDIF630erm_01408	[gene=CD630DERM_12550]	rimM	-0.87	-0.79	-0.58	-0.78	0.000807329	0.0480728	3.50692e-05	1.5665e-05
CDIF630erm_01409	[gene=CD630DERM_12560]	trmD	-0.69	-0.2	0.4	0.03	0.000725226	0.1961	0.0919278	0.00107875
CDIF630erm_01410	[gene=CD630DERM_12570]	rplS	-0.22	-0.54	-0.8	-0.97	0.00235349	0.122878	0.000102689	0.000641742
CDIF630erm_01411	[gene=CD630DERM_12580]		-0.44	-0.3	0.41	-0.17	0.00267016	0.167931	0.00246223	0.00988745
CDIF630erm_01412	[gene=CD630DERM_12590]	brnQ-1	0.31	0.59	0.32	0.36	0.00975531	0.0369775	2.47071e-05	8.92488e-05
CDIF630erm_01413	[gene=CD630DERM_12600]	brnQ-2	1.08	2.48	1.37	1.41	0.00509833	0.0767379	0.0123369	0.00118481
CDIF630erm_01414	[gene=CD630DERM_12610]	nrdZ	0.63	0.01	0.33	0.95	0.00597594	0.59476	0.20082	0.000545094
CDIF630erm_01415	[gene=CD630DERM_12620]	rnhB	0.55	0.14	0.49	0.76	0.0198533	0.911258	0.00241656	0.000103945
CDIF630erm_01416	[gene=CD630DERM_12630]		0.57	0.54	1.45	1.22	0.00844306	0.417739	2.63949e-05	0.000132086
CDIF630erm_01417	[gene=CD630DERM_12640]		0.42	1.43	-0.28	-0.32	0.0248433	0.125421	2.79588e-05	0.000370515
CDIF630erm_01418	[gene=CD630DERM_12650]		-0.34	-0.21	-0.23	0	0.0315446	0.265152	0.00162657	0.51523
CDIF630erm_01419	[gene=CD630DERM_12660]		-0.1	-0.04	0.02	-0.04	0.0194507	0.9335	0.078296	0.396206
CDIF630erm_01420	[gene=CD630DERM_12670]		-0.03	-0.07	0.16	0.11	0.481799	0.79961	0.000363143	0.0011715
CDIF630erm_01421	[gene=CD630DERM_12680]		-0.14	-0.08	0.09	-0.02	0.00239022	0.830709	0.00235652	0.233504
CDIF630erm_01422	[gene=CD630DERM_12690]		-0.05	-0.07	0.58	0.14	0.263559	0.957522	0.000376969	0.00103278
CDIF630erm_01423	[gene=CD630DERM_12700]		0.03	0	0.02	0	0.132539	0.871952	0.0504599	0.0946472
CDIF630erm_01424	[gene=CD630DERM_12710]		-0.14	-0.08	0.24	0.12	0.00706514	0.931781	0.0403926	0.00832182
CDIF630erm_01425	[gene=CD630DERM_12720]		0.04	0.09	0.33	0.21	0.0235193	0.343163	7.11495e-05	9.15935e-05
CDIF630erm_01426	[gene=CD630DERM_12730]		-0.11	-0.32	-0.26	-0.36	0.106146	0.167939	0.000175731	0.000142759
CDIF630erm_01427	[gene=CD630DERM_12740]	topA	0.07	0.24	0.91	0.52	0.926084	0.377579	0.000196999	0.00129684
CDIF630erm_01428	[gene=CD630DERM_12750]	codY	-0.13	-0.41	-0.34	-0.01	0.00334249	0.163186	0.00010129	0.00155526
CDIF630erm_01429	[gene=CD630DERM_12760]		-0.1	-0.28	-0.3	-0.36	0.0254468	0.20074	0.00104317	0.000209429
CDIF630erm_01430	[gene=CD630DERM_12770]		0	0.19	0.82	0.59	0.979482	0.563182	7.37988e-05	0.000998652
CDIF630erm_01431	[gene=CD630DERM_12780]	iscR	0.38	0.28	0.57	1.16	0.0330505	0.363763	0.000358851	1.55348e-05
CDIF630erm_01432	[gene=CD630DERM_12790]	iscS2	1.66	0.92	1.15	2.57	0.00285064	0.16276	0.00142679	0.000193241
CDIF630erm_01433	[gene=CD630DERM_12800]		1.71	1.03	0.61	2.26	0.00213828	0.13813	0.208275	0.000564158
CDIF630erm_01434	[gene=CD630DERM_12810]	mnmA	-0.4	-0.55	-0.07	-0.47	0.00430142	0.109131	0.000420863	5.07613e-05
CDIF630erm_01436	[gene=CD630DERM_12820]	alaS	-0.3	-0.2	-0.56	-0.89	0.00462618	0.258925	0.000144535	9.63249e-06
CDIF630erm_01437	[gene=CD630DERM_12830]		-0.03	-0.1	-0.48	-0.45	0.283262	0.360642	0.000176017	4.0056e-05
CDIF630erm_01438	[gene=CD630DERM_12840]		0.06	0.17	0.53	-0.04	0.660294	0.508178	0.0223281	0.000190887
CDIF630erm_01439	[gene=CD630DERM_12850]		-0.38	-0.11	0.51	0.01	0.00167804	0.568157	0.0070921	0.0857941
CDIF630erm_01440	[gene=CD630DERM_12860]		-0.31	-0.46	-1.01	-1.33	0.00166576	0.170802	4.48697e-06	5.53847e-06
CDIF630erm_01441	[gene=CD630DERM_12870]	fur	0.9	-0.08	0.48	2.23	0.00579275	0.411355	0.70926	0.000439991
CDIF630erm_01442	[gene=CD630DERM_12880]		-0.13	-0.05	-0.06	-0.15	0.0193054	0.870143	0.376222	0.0275284
CDIF630erm_01443	[gene=CD630DERM_12890]		-0.31	-0.69	-0.5	-0.81	0.0190183	0.104917	1.55529e-05	4.10015e-05
CDIF630erm_01444	[gene=CD630DERM_12900]		-0.1	0.12	0.14	0.08	0.109445	0.503974	0.014781	0.0660684
CDIF630erm_01445	[gene=CD630DERM_12910]	dacF2	-0.05	0.11	0.24	0.25	0.230448	0.31435	7.04378e-05	0.000182624
CDIF630erm_01446	[gene=CD630DERM_12920]		0.08	0.06	-0.18	-0.16	0.0948192	0.633653	0.570329	0.0245649
CDIF630erm_01447	[gene=CD630DERM_12930]		0.04	0.1	0.24	0.16	0.09042	0.326886	7.46572e-05	0.00144016
CDIF630erm_01448	[gene=CD630DERM_12940]		-0.07	0.15	1	0.68	0.0377571	0.647058	2.69634e-05	0.000173408
CDIF630erm_01449	[gene=CD630DERM_12950]	scpA	-0.25	-0.32	-0.35	-0.36	0.00269852	0.187845	0.00793518	5.48202e-05
CDIF630erm_01450	[gene=CD630DERM_12960]	scpB	-0.27	-0.49	-0.57	-0.66	0.00254671	0.144365	1.44867e-05	9.48392e-06
CDIF630erm_01451	[gene=CD630DERM_12970]		0.05	0.26	0.86	0.81	0.025673	0.227124	1.80775e-05	3.35433e-05
CDIF630erm_01452	[gene=CD630DERM_12980]		0.03	0.34	1.23	1.04	0.438124	0.222178	1.43199e-05	5.67381e-05
CDIF630erm_01453	[gene=CD630DERM_12990]		-0.08	-0.29	-0.46	-0.44	0.20862	0.212377	4.24503e-05	3.89721e-05
CDIF630erm_01454	[gene=CD630DERM_13000]	pepA	-0.06	-0.09	-0.04	-0.15	0.0717561	0.622497	0.166759	0.0026813
CDIF630erm_01455	[gene=CD630DERM_13010]		0.06	0.11	0.22	0.16	0.0165047	0.267252	0.000312846	0.000200126
CDIF630erm_01456	[gene=CD630DERM_13011]		-0.21	-0.27	-0.18	-0.06	0.0030864	0.199871	0.112884	0.307273
CDIF630erm_01457	[gene=CD630DERM_13020]		0.08	-0.13	-0.53	-0.8	0.608255	0.390133	2.40128e-05	2.06608e-05
CDIF630erm_01458	[gene=CD630DERM_13030]	npdA	0.45	0.2	-0.32	-0.43	0.00246245	0.615395	0.000289994	3.13389e-05
CDIF630erm_01459	[gene=CD630DERM_13040]	acd	0.81	0.31	0.13	0.46	0.00163042	0.513886	0.481076	0.00152937
CDIF630erm_01460	[gene=CD630DERM_13050]	polC	0.53	0.06	-0.02	0.63	0.00135039	0.930534	0.614262	0.000240734
CDIF630erm_01461	[gene=CD630DERM_13060]	rimP	-0.58	-0.73	-0.61	-0.75	0.00370987	0.098846	6.97908e-06	0.000248668
CDIF630erm_01462	[gene=CD630DERM_13070]	nusA	-0.15	-0.54	-0.28	0.53	0.039524	0.128904	5.98098e-05	0.174105
CDIF630erm_01463	[gene=CD630DERM_13071]		-0.06	-0.31	-0.21	0.41	0.117513	0.157068	0.000176072	0.389126
CDIF630erm_01464	[gene=CD630DERM_13080]		-0.06	-0.45	-0.51	0.18	0.142477	0.168225	4.25428e-05	0.0637358
CDIF630erm_01465	[gene=CD630DERM_13090]	infB	0.15	-0.04	-0.02	0.33	0.539832	0.242475	0.000430467	0.121546
CDIF630erm_01466	[gene=CD630DERM_13100]	rbfA	0.15	-0.02	-0.42	0.08	0.45341	0.258242	0.000297583	0.0136611
CDIF630erm_01467	[gene=CD630DERM_13110]		0.17	-0.09	-0.22	0.16	0.34491	0.28269	0.000478142	0.0501261
CDIF630erm_01468	[gene=CD630DERM_13120]	tlpB2	0.14	-0.31	-0.47	-0.06	0.657256	0.247422	0.000607566	0.061298
CDIF630erm_01470	[gene=CD630DERM_13140]	truB	-0.02	-0.26	-0.23	-0.34	0.416789	0.173466	0.000257368	0.00260954
CDIF630erm_01471	[gene=CD630DERM_13150]	ribF	-0.47	-0.65	-0.58	-0.75	0.00060789	0.0699824	7.47767e-05	2.04419e-05
	[gene=CD630DERM_13151]		-0.71	-1.25	-1.1	-1.25	0.000881766	0.066296	4.82145e-06	5.66369e-06
CDIF630erm_01472	[gene=CD630DERM_13160]	rpsO	-0.72	-1.67	-1.29	-1.18	0.00086753	0.0834421	1.76488e-05	6.69856e-06
CDIF630erm_01473	[gene=CD630DERM_13170]		0.4	0.03	-0.19	0.49	0.010771	0.961316	0.014688	0.000319204
CDIF630erm_01474	[gene=CD630DERM_13180]	pnp	-0.2	-0.28	0	-0.37	0.00166576	0.148815	0.000275737	5.2449e-05
CDIF630erm_01475	[gene=CD630DERM_13190]		-0.02	0.3	0.77	0.17	0.846985	0.19866	4.97101e-05	0.00529013
CDIF630erm_01476	[gene=CD630DERM_13200]		0.27	-0.11	0.17	-0.07	0.0132136	0.438037	0.030775	0.0619296
CDIF630erm_01477	[gene=CD630DERM_13210]		0.15	-0.27	-0.57	-0.51	0.0687777	0.31472	2.6355e-05	0.000591851
CDIF630erm_01478	[gene=CD630DERM_13220]	dapG	0.13	-0.04	0.34	0.06	0.553718	0.442768	0.680383	0.00341355
CDIF630erm_01479	[gene=CD630DERM_13230]	tepA	0.02	-0.36	-0.26	-0.46	0.289722	0.172011	0.00015838	0.000103777
CDIF630erm_01480	[gene=CD630DERM_13240]	ftsK	-0.18	-0.32	-0.25	-0.29	0.00758611	0.150464	0.00317606	0.000189503
CDIF630erm_01481	[gene=CD630DERM_13250]	selU	-0.33	-0.54	-0.58	-0.63	0.00531667	0.12935	1.21383e-05	1.75041e-05
CDIF630erm_01482	[gene=CD630DERM_13260]	rimO	-0.25	-0.39	-0.31	-0.33	0.0148718	0.144365	0.000268888	0.000103815
CDIF630erm_01483	[gene=CD630DERM_13270]	pgsA	-0.25	-0.35	-0.34	-0.42	0.0199579	0.148697	0.000151657	2.90568e-05
CDIF630erm_01484	[gene=CD630DERM_13280]	recA	0.45	0.25	0.63	1.49	0.00496844	0.804303	0.000535626	4.06027e-05
CDIF630erm_01485	[gene=CD630DERM_13290]		0.31	-0.13	0.03	0.42	0.0138715	0.26992	0.00161558	0.474973
CDIF630erm_01486	[gene=CD630DERM_13300]		-0.01	-0.03	-0.16	-0.16	0.604806	0.725587	0.00713989	0.00210963
CDIF630erm_01487	[gene=CD630DERM_13310]	spsB3	-0.8	-0.91	-0.84	-1.08	0.000448418	0.0566389	8.88656e-06	5.90577e-06
CDIF630erm_01488	[gene=CD630DERM_13320]	uppP1	-0.85	-0.75	-0.24	-0.69	0.000558032	0.0282944	7.78313e-05	1.56439e-05
CDIF630erm_01489	[gene=CD630DERM_13330]		-0.09	-0.08	-0.25	0.02	0.0852622	0.570313	0.00160633	0.29482
CDIF630erm_01490	[gene=CD630DERM_13340]	purB	-2.04	-1.74	-0.93	-1.4	0.000548277	0.00434715	1.63732e-05	5.40512e-06
CDIF630erm_01491	[gene=CD630DERM_13350]		-0.54	-0.67	-0.58	-0.73	0.00083436	0.0934018	7.74588e-05	1.20185e-05
CDIF630erm_01492	[gene=CD630DERM_13360]		-0.34	-0.29	-0.3	-0.37	0.00060789	0.14028	0.000756615	0.000105191
CDIF630erm_01493	[gene=CD630DERM_13370]		0.04	-0.02	-0.15	-0.09	0.47192	0.974321	0.0613763	0.15924
CDIF630erm_01494	[gene=CD630DERM_13380]	malH2	0.16	0.3	0.12	0.19	0.0029735	0.14204	0.00821478	0.0016362
CDIF630erm_01495	[gene=CD630DERM_13390]		1.19	2.05	0.77	0.57	0.00414243	0.0225015	0.135532	0.705932
CDIF630erm_01496	[gene=CD630DERM_13400]	galT	-0.03	-0.14	-0.28	-0.37	0.42313	0.405449	0.00012862	7.0673e-05
CDIF630erm_01497	[gene=CD630DERM_13410]	exoA	0.47	0.1	0.83	0.89	0.0101546	0.773254	4.49506e-05	2.80842e-05
CDIF630erm_01498	[gene=CD630DERM_13420]		-0.19	-0.05	0.09	0.03	0.0119747	0.863765	0.00541655	0.0964214
CDIF630erm_01499	[gene=CD630DERM_13430]	glnA	-1.19	-1.1	-0.71	-1.13	0.000557832	0.0171051	7.01523e-05	1.05974e-05
CDIF630erm_01500	[gene=CD630DERM_13440]	ugtP2	0.05	0.18	0.69	0.45	0.0804548	0.289147	5.09509e-05	0.000948131
CDIF630erm_01501	[gene=CD630DERM_13450]		-0.37	-0.47	-0.51	-0.45	0.00196449	0.0891322	2.40128e-05	3.37625e-05
CDIF630erm_01502	[gene=CD630DERM_13460]		-0.11	0.54	1.48	0.98	0.0391071	0.270344	2.40128e-05	4.64321e-05
CDIF630erm_01503	[gene=CD630DERM_13470]		-0.34	-0.29	-0.26	-0.34	0.00143871	0.157068	0.00115201	7.11989e-05
CDIF630erm_01504	[gene=CD630DERM_13480]		-0.73	-0.92	-0.66	-0.77	0.00235325	0.0445367	9.73625e-06	3.37625e-05
CDIF630erm_01505	[gene=CD630DERM_13490]	cprA	0.05	0.07	0.55	0.28	0.0431615	0.394192	2.09376e-05	0.000620896
CDIF630erm_01506	[gene=CD630DERM_13500]	cprB	0.04	0.13	0.45	0.27	0.110574	0.281568	2.38214e-05	0.000165759
CDIF630erm_01507	[gene=CD630DERM_13510]	cprC	-0.15	-0.28	-0.21	-0.26	0.00255394	0.144591	0.0108395	0.00156435
CDIF630erm_01508	[gene=CD630DERM_13520]	cprK	-0.22	-0.33	-0.44	-0.51	0.00172907	0.14057	8.57518e-05	3.09939e-05
CDIF630erm_01509	[gene=CD630DERM_13530]		0.23	0.19	-0.26	-1	0.200592	0.715858	0.00019649	2.27223e-05
CDIF630erm_01510	[gene=CD630DERM_13540]		0.03	0.24	0.57	0.35	0.550329	0.324577	0.000206551	0.00145341
CDIF630erm_01511	[gene=CD630DERM_13550]	cspB	-0.69	-2.34	-2.52	-2.29	0.000424463	0.117202	1.35194e-05	1.57591e-05
CDIF630erm_01512	[gene=CD630DERM_13560]		-0.15	-0.42	-0.43	-0.62	0.0120502	0.196858	5.76167e-05	1.17873e-05
CDIF630erm_01513	[gene=CD630DERM_13570]		-0.09	-0.73	-1.05	-1.67	0.00367919	0.14129	4.93546e-06	3.93139e-06
CDIF630erm_01514	[gene=CD630DERM_13580]		0	-0.13	-0.26	-0.24	0.693489	0.414668	0.0040619	0.00559
CDIF630erm_01515	[gene=CD630DERM_13590]		-0.08	0.06	0.18	0.11	0.0526858	0.452547	0.00144515	0.0039085
CDIF630erm_01516	[gene=CD630DERM_13600]		0	-0.23	-0.29	-0.39	0.813974	0.229331	0.000599431	4.59793e-05
CDIF630erm_01517	[gene=CD630DERM_13601]		0.03	0.14	0.29	0.37	0.0545804	0.237493	6.65462e-05	2.46579e-05
CDIF630erm_01518	[gene=CD630DERM_13610]		-0.15	-0.1	-0.05	-0.05	0.00171058	0.526536	0.561814	0.842206
CDIF630erm_01519	[gene=CD630DERM_13620]		-0.02	0.07	0.1	0.02	0.683966	0.441251	0.000644082	0.0113208
CDIF630erm_01520	[gene=CD630DERM_13630]		-0.04	0.09	0.29	0.24	0.21798	0.394391	0.00226558	0.000775374
CDIF630erm_01521	[gene=CD630DERM_13640]		-0.1	0.24	0.48	0.33	0.0193054	0.311401	3.41572e-05	0.0006248
CDIF630erm_01522	[gene=CD630DERM_13650]		-0.14	-0.05	0.06	0.02	0.00211547	0.945637	0.00432834	0.0118121
CDIF630erm_01523	[gene=CD630DERM_13651]		-0.01	-0.02	0.16	0.12	0.900102	0.707934	0.000529883	0.00257215
CDIF630erm_01524	[gene=CD630DERM_13660]		0.03	0.04	0.24	0.36	0.0794274	0.853771	0.00245956	9.16036e-05
CDIF630erm_01525	[gene=CD630DERM_13670]		-0.05	-0.08	-0.05	0.05	0.0973327	0.889876	0.571435	0.00276735
CDIF630erm_01526	[gene=CD630DERM_13680]		-0.16	0.1	0.72	0.61	0.00339332	0.518573	0.00014789	2.28744e-05
CDIF630erm_01527	[gene=CD630DERM_13690]		-0.06	-0.05	0.06	0.06	0.0568911	0.933523	0.0141061	0.00263417
CDIF630erm_01528	[gene=CD630DERM_13700]		0.02	0.23	0.35	0.27	0.143318	0.217447	4.24503e-05	9.61922e-05
CDIF630erm_01529	[gene=CD630DERM_13710]		-0.1	0	0.05	-0.01	0.0321098	0.643083	0.00831131	0.0675887
CDIF630erm_01530	[gene=CD630DERM_13720]		-0.08	0.1	0.12	0.11	0.0235193	0.398943	0.00242669	0.0041369
CDIF630erm_01531	[gene=CD630DERM_13730]		-0.01	0.29	0.32	0.13	0.728426	0.258242	5.39717e-05	0.000334995
CDIF630erm_01532	[gene=CD630DERM_13740]		-0.02	-0.14	-0.04	0.01	0.845848	0.437239	0.0890734	0.0111915
CDIF630erm_01533	[gene=CD630DERM_13750]		-0.07	-0.13	0	-0.02	0.153184	0.521628	0.207596	0.583122
CDIF630erm_01534	[gene=CD630DERM_13760]		-0.09	0.45	1.28	0.8	0.0211415	0.287287	1.38686e-05	0.000173489
CDIF630erm_01535	[gene=CD630DERM_13770]		-0.38	-0.73	-0.71	-1.19	0.00271568	0.114582	8.42689e-06	1.18878e-05
CDIF630erm_01536	[gene=CD630DERM_13780]		0.04	0.04	-0.47	-0.03	0.471294	0.633653	4.12174e-05	0.0329886
CDIF630erm_01537	[gene=CD630DERM_13781]		-0.03	0	0.01	-0.08	0.552977	0.79971	0.176151	0.204319
CDIF630erm_01538	[gene=CD630DERM_13782]		-0.11	-0.06	-0.11	-0.11	0.0360561	0.92895	0.126696	0.0283164
CDIF630erm_01539	[gene=CD630DERM_13790]		-0.18	-0.16	-0.07	-0.04	0.00793196	0.384808	0.0883045	0.516388
CDIF630erm_01540	[gene=CD630DERM_13800]		0.03	0.04	0.18	-0.01	0.158517	0.461056	0.000486066	0.0442854
CDIF630erm_01541	[gene=CD630DERM_13810]		-0.1	0	0.52	0.21	0.00663091	0.741842	0.00012862	0.00186683
CDIF630erm_01542	[gene=CD630DERM_13820]	glpK2	-0.01	0.12	0.03	-0.02	0.99847	0.283504	0.0726582	0.489251
CDIF630erm_01543	[gene=CD630DERM_13830]		-0.22	-0.07	-0.09	-0.1	0.0104796	0.725179	0.196823	0.21427
CDIF630erm_01544	[gene=CD630DERM_13840]		-0.49	-0.45	-0.38	-0.72	0.00204372	0.155878	4.02947e-05	2.45821e-05
CDIF630erm_01545	[gene=CD630DERM_13850]		-0.43	-0.23	0.33	-0.19	0.00351054	0.233182	0.559835	0.0133239
CDIF630erm_01546	[gene=CD630DERM_13860]	kipI	-0.37	-0.21	-0.11	-0.52	0.00579275	0.258925	0.000646484	6.57681e-05
CDIF630erm_01547	[gene=CD630DERM_13870]	kipA	-0.35	0.06	0.45	0.1	0.0115018	0.614903	0.256177	0.229084
CDIF630erm_01548	[gene=CD630DERM_13880]		0.08	0.12	0.23	0.04	0.0700128	0.278832	0.000291407	0.00618373
CDIF630erm_01549	[gene=CD630DERM_13890]		-0.06	0.01	0.29	0.1	0.0608388	0.688081	4.80238e-05	0.00102117
CDIF630erm_01550	[gene=CD630DERM_13900]		-0.23	-0.08	0.17	0.31	0.00347524	0.914967	0.000176028	0.000228579
CDIF630erm_01551	[gene=CD630DERM_13910]		-0.27	-0.18	0.15	0.11	0.00483802	0.506855	0.0007362	0.000574311
CDIF630erm_01552	[gene=CD630DERM_13920]		0.06	-0.52	-0.91	-1.35	0.274065	0.1924	2.40128e-05	5.34785e-06
CDIF630erm_01553	[gene=CD630DERM_13930]		0.06	-0.03	0.44	0.08	0.543194	0.961095	0.000177654	0.767475
CDIF630erm_01554	[gene=CD630DERM_13940]		-0.23	-0.27	-0.21	-0.42	0.00214686	0.189568	0.000195766	2.80842e-05
CDIF630erm_01555	[gene=CD630DERM_13950]		0.07	0.06	-0.17	-0.12	0.0618448	0.519515	0.0324433	0.110956
CDIF630erm_01556	[gene=CD630DERM_13960]		0.15	0.14	0.26	0.29	0.0463184	0.554078	0.0466977	0.000467169
CDIF630erm_01557	[gene=CD630DERM_13970]		-0.01	0.19	0.62	0.44	0.837333	0.272044	1.27838e-05	3.97489e-05
CDIF630erm_01558	[gene=CD630DERM_13980]		0.1	0.29	0.93	0.81	0.00611216	0.197498	8.88397e-06	1.55348e-05
CDIF630erm_01559	[gene=CD630DERM_13990]		-0.12	-0.25	-0.36	-0.46	0.0277973	0.253834	0.000443522	7.82378e-05
CDIF630erm_01560	[gene=CD630DERM_14000]		-0.05	-0.42	-0.59	-0.69	0.29364	0.173466	1.10805e-05	8.41689e-06
CDIF630erm_01561	[gene=CD630DERM_14010]		0	-0.11	-0.15	-0.36	0.657439	0.503631	0.0320467	0.000117645
CDIF630erm_01562	[gene=CD630DERM_14020]	glpQ	-0.06	-0.1	0.03	0.03	0.0600289	0.819573	0.0103983	0.0110114
CDIF630erm_01563	[gene=CD630DERM_14030]		0.21	0.41	1	0.89	0.0234264	0.172312	6.33157e-05	0.0026051
CDIF630erm_01564	[gene=CD630DERM_14040]		-0.3	0.07	-0.49	-0.51	0.0208375	0.265152	5.16075e-05	2.70654e-05
CDIF630erm_01565	[gene=CD630DERM_14041]	pqqD	-0.32	0.17	-0.75	-0.7	0.0205627	0.363271	2.07548e-05	1.97689e-05
CDIF630erm_01566	[gene=CD630DERM_14050]		0.01	-0.01	-0.07	-0.11	0.47801	0.898023	0.466858	0.00713535
CDIF630erm_01567	[gene=CD630DERM_14060]		0.01	0.04	-0.02	0.27	0.871352	0.907655	0.125351	0.0238684
CDIF630erm_01568	[gene=CD630DERM_14070]		0.28	0.19	-0.01	-0.13	0.00601895	0.440325	0.0444294	0.0283484
CDIF630erm_01569	[gene=CD630DERM_14080]	ddl	0.74	0.45	0.15	-0.16	0.00857377	0.560163	0.42633	4.63539e-05
CDIF630erm_01570	[gene=CD630DERM_14090]		-0.01	-0.06	-0.06	-0.25	0.301936	0.503631	0.00336319	0.000142718
CDIF630erm_01571	[gene=CD630DERM_14100]		-0.08	-0.29	-0.8	-0.69	0.0289317	0.240657	6.19153e-06	2.78095e-05
CDIF630erm_01572	[gene=CD630DERM_14110]		-0.19	-0.4	-0.64	-0.52	0.0145311	0.205452	1.96665e-05	0.000206288
CDIF630erm_01573	[gene=CD630DERM_14120]		0.06	0	0.23	0.25	0.0188132	0.546792	7.33204e-05	0.000109588
CDIF630erm_01574	[gene=CD630DERM_14130]		0.42	0.16	0.04	0.03	0.00060789	0.599831	0.0822399	0.130809
CDIF630erm_01575	[gene=CD630DERM_14140]		-0.2	-0.09	0.34	0.2	0.00310351	0.787915	0.00294674	0.0300214
CDIF630erm_01576	[gene=CD630DERM_14150]		-0.14	-0.15	-0.17	-0.27	0.00724223	0.465347	0.0213421	0.00019258
CDIF630erm_01577	[gene=CD630DERM_14160]		0.06	0.14	0.22	0.21	0.0125519	0.244927	0.000139742	9.40043e-05
CDIF630erm_01578	[gene=CD630DERM_14170]		0.14	0.93	0.35	0.26	0.486548	0.170732	0.0212694	0.0524375
CDIF630erm_01579	[gene=CD630DERM_14180]		-0.03	0.33	0.38	0.22	0.53139	0.273503	0.000273196	0.00109339
CDIF630erm_01580	[gene=CD630DERM_14182]		0.01	0.5	-0.36	-0.37	0.541076	0.201255	0.000119075	0.0133645
CDIF630erm_01581	[gene=CD630DERM_14190]		0.06	0.46	0.98	0.81	0.1831	0.170088	3.72851e-05	3.31481e-05
CDIF630erm_01582	[gene=CD630DERM_14200]	dccA	-0.22	-0.3	-0.33	-0.35	0.00496086	0.172312	0.000125326	0.000274718
CDIF630erm_01583	[gene=CD630DERM_14210]		-0.12	0.1	0.3	0.32	0.0124812	0.503435	0.0848911	0.000252645
CDIF630erm_01584	[gene=CD630DERM_14220]		-0.12	-0.2	-0.31	-0.38	0.0134315	0.282544	0.00028611	0.000108051
CDIF630erm_01585	[gene=CD630DERM_14230]		-0.12	-0.26	-0.49	-0.44	0.0182168	0.193036	4.04725e-05	5.19631e-05
CDIF630erm_01586	[gene=CD630DERM_14240]		0.34	0.92	0.18	1.85	0.0384456	0.214663	0.935342	3.69189e-05
CDIF630erm_01588	[gene=CD630DERM_14250]		0.11	0.4	0.45	0.49	0.157149	0.239776	0.00010633	0.000243878
CDIF630erm_01591	[gene=CD630DERM_14280]		0.08	0	-0.28	-0.33	0.00622903	0.98519	0.00506652	8.90066e-05
CDIF630erm_01592	[gene=CD630DERM_14281]		-0.26	-0.26	-0.08	-0.18	0.00086753	0.162437	0.458096	0.00634261
CDIF630erm_01593	[gene=CD630DERM_14290]		-0.1	-0.15	-0.37	-0.38	0.161534	0.421845	0.000253415	0.000126694
CDIF630erm_01594	[gene=CD630DERM_14300]		0.05	0.2	0.33	0.29	0.0199579	0.1961	3.20925e-05	5.01315e-05
CDIF630erm_01595	[gene=CD630DERM_14310]		-0.17	-0.21	-0.33	-0.28	0.00271568	0.230084	0.00204047	0.00035061
CDIF630erm_01596	[gene=CD630DERM_14320]		-0.2	-0.25	0.2	-0.06	0.00615171	0.2343	0.363962	0.00297035
CDIF630erm_01597	[gene=CD630DERM_14330]	cotE	0.04	0.23	0.46	0.38	0.0692496	0.20074	1.82923e-05	4.60863e-05
CDIF630erm_01598	[gene=CD630DERM_14340]		0.26	-0.35	-0.47	0.14	0.0229337	0.272546	0.000207822	0.0566282
CDIF630erm_01599	[gene=CD630DERM_14350]		0.09	-0.52	-0.54	-0.06	0.833288	0.156543	7.15148e-05	0.411408
CDIF630erm_01600	[gene=CD630DERM_14360]		0.38	-0.35	-0.61	-0.05	0.0858893	0.231474	1.92614e-05	0.134676
CDIF630erm_01602	[gene=CD630DERM_14380]		-0.08	-0.36	-0.41	0.21	0.212289	0.199847	0.000798964	0.119778
CDIF630erm_01603	[gene=CD630DERM_14390]		-0.01	-0.33	-0.51	-0.4	0.911108	0.279571	7.92175e-05	0.00116411
CDIF630erm_01604	[gene=CD630DERM_14400]		0.06	0.15	0.1	-0.03	0.472413	0.491725	0.0856486	0.566414
CDIF630erm_01605	[gene=CD630DERM_14410]		-0.03	0.01	-0.01	0.21	0.406079	0.933091	0.0584201	0.00389422
CDIF630erm_01606	[gene=CD630DERM_14420]		-0.22	-0.03	0.2	0.14	0.00685322	0.241807	0.00436478	0.00201381
CDIF630erm_01607	[gene=CD630DERM_14430]		-0.19	-0.06	-0.14	0.02	0.00985819	0.52157	0.0253563	0.0603782
CDIF630erm_01608	[gene=CD630DERM_14440]		-0.09	-0.26	-0.61	-0.44	0.0399771	0.251838	3.20925e-05	9.6731e-05
CDIF630erm_01609	[gene=CD630DERM_14450]	pabA	0.02	0.04	-0.09	-0.08	0.993452	0.987482	0.00262341	0.0255696
CDIF630erm_01610	[gene=CD630DERM_14460]	pabB	0.04	-0.05	-0.19	-0.13	0.741152	0.608243	0.00709634	0.00175624
CDIF630erm_01611	[gene=CD630DERM_14470]	pabC	-0.03	-0.42	-0.75	-0.69	0.397712	0.197877	1.52116e-05	6.69856e-06
CDIF630erm_01612	[gene=CD630DERM_14480]		0.02	-0.36	-0.72	-0.61	0.606463	0.247422	0.000146459	5.24991e-05
CDIF630erm_01613	[gene=CD630DERM_14490]	folE	0.21	0.07	0.59	0.72	0.039586	0.620305	0.00261728	0.0006248
CDIF630erm_01614	[gene=CD630DERM_14500]	folP	0.25	-0.05	-0.01	0.46	0.0172148	0.344661	0.00156389	0.0366339
CDIF630erm_01615	[gene=CD630DERM_14510]	folB	0.26	-0.07	-0.19	0.08	0.00542805	0.40644	0.000672233	0.319022
CDIF630erm_01616	[gene=CD630DERM_14520]	folK	0.21	0.01	0.29	0.25	0.0435338	0.470798	0.23525	0.824874
CDIF630erm_01617	[gene=CD630DERM_14530]	aroF1	0.27	0.17	0.23	0.16	0.019118	0.707934	0.763907	0.246882
CDIF630erm_01618	[gene=CD630DERM_14540]	dnaG	-0.31	-0.37	0.08	-0.24	0.0110587	0.133603	0.00197845	0.00071734
CDIF630erm_01619	[gene=CD630DERM_14550]	sigA1	-0.28	-0.41	0.16	-0.1	0.00836928	0.114582	0.000718172	0.000142173
CDIF630erm_01620	[gene=CD630DERM_14560]		-0.24	0.2	1.46	0.58	0.00508144	0.463601	1.92196e-05	0.061298
CDIF630erm_01621	[gene=CD630DERM_14570]		0.03	-0.19	-0.33	-0.27	0.800861	0.303265	4.64305e-05	0.00045914
CDIF630erm_01622	[gene=CD630DERM_14580]	wrbA	0.09	-0.03	-0.26	-0.21	0.233534	0.570439	0.00101029	0.000260393
CDIF630erm_01623	[gene=CD630DERM_14590]		0.5	0.17	-0.48	-0.45	0.00086753	0.883387	1.58834e-05	3.89721e-05
CDIF630erm_01624	[gene=CD630DERM_14600]		0.37	0.22	0	0.41	0.00147334	0.34456	0.469586	0.000222047
CDIF630erm_01625	[gene=CD630DERM_14610]		0.11	0.16	0.11	0.15	0.0592309	0.238488	0.000975025	0.000465136
CDIF630erm_01626	[gene=CD630DERM_14620]		0.09	0	-0.38	-0.16	0.145516	0.845382	0.00124133	0.0437735
CDIF630erm_01627	[gene=CD630DERM_14630]		0.46	0.01	-0.05	1.38	0.00534291	0.904115	0.67226	0.000199432
CDIF630erm_01628	[gene=CD630DERM_14640]		-0.06	-0.18	-0.08	0.25	0.242552	0.293257	0.989384	0.0293075
CDIF630erm_01629	[gene=CD630DERM_14650]		-0.06	-0.18	-0.11	0.1	0.0790167	0.370799	0.740048	0.137085
CDIF630erm_01630	[gene=CD630DERM_14660]		0.02	0.04	0.04	0.34	0.297142	0.487964	0.0146321	0.00195693
CDIF630erm_01631	[gene=CD630DERM_14670]		0	-0.04	-0.01	0.11	0.754264	0.937898	0.199672	0.0426919
CDIF630erm_01632	[gene=CD630DERM_14680]		0.25	0.09	-0.25	-0.12	0.012456	0.773246	0.00012523	0.000523147
CDIF630erm_01633	[gene=CD630DERM_14690]	cwp20	0.65	0.86	-0.26	-0.38	0.00209181	0.146143	7.46572e-05	2.06608e-05
CDIF630erm_01634	[gene=CD630DERM_14700]		0.39	-0.38	-0.61	-0.48	0.0312238	0.20131	0.000154233	0.00119777
CDIF630erm_01635	[gene=CD630DERM_14710]		0	-0.18	-0.27	-0.03	0.972319	0.472008	0.0638274	0.260794
CDIF630erm_01636	[gene=CD630DERM_14720]		0.05	-0.02	0.01	0	0.0255733	0.930534	0.013881	0.0200922
CDIF630erm_01637	[gene=CD630DERM_14730]		0.3	-0.05	-0.22	0.01	0.00202821	0.756618	0.010557	0.087819
CDIF630erm_01638	[gene=CD630DERM_14740]	rbr2	1.63	1.39	2.16	2.62	0.00606901	0.654669	0.532436	0.00393353
CDIF630erm_01639	[gene=CD630DERM_14750]		-0.16	-0.27	-0.14	-0.04	0.277445	0.238752	0.011928	0.426494
CDIF630erm_01640	[gene=CD630DERM_14760]		-0.18	-0.14	0.06	0.02	0.124317	0.402791	0.85	0.0564225
CDIF630erm_01641	[gene=CD630DERM_14770]	feoA1	-2.19	-1.71	-1.1	-1.06	0.000391069	0.0171051	6.44565e-06	9.16036e-05
CDIF630erm_01642	[gene=CD630DERM_14780]	feoA2	-2.43	-1.88	-0.91	-1.02	0.000424463	0.00552717	4.12174e-05	1.58263e-05
CDIF630erm_01643	[gene=CD630DERM_14790]	feoB1	-2.8	-2.18	-0.99	-1.15	0.000483568	0.00552717	8.88656e-06	2.02594e-05
CDIF630erm_01644	[gene=CD630DERM_14800]		-2.83	-2.31	-1.31	-1.46	0.000557832	0.00552717	3.96213e-06	3.93259e-05
CDIF630erm_01645	[gene=CD630DERM_14810]		-0.11	-0.04	0	-0.15	0.0800668	0.506855	0.00162838	0.000222047
CDIF630erm_01646	[gene=CD630DERM_14820]	ssuC1	-0.06	-0.12	-0.2	-0.25	0.346361	0.396233	0.00310623	0.000654392
CDIF630erm_01647	[gene=CD630DERM_14830]	ssuB1	-0.09	0.03	0.38	0.2	0.155654	0.789364	0.00315193	0.0798006
CDIF630erm_01648	[gene=CD630DERM_14840]	ssuA1	0.89	1.3	1.05	0.53	0.00638029	0.0171051	0.00018368	0.00729401
CDIF630erm_01649	[gene=CD630DERM_14850]		-1.33	-1.07	-0.51	-0.68	0.000814754	0.0259057	2.9607e-05	3.75306e-05
CDIF630erm_01650	[gene=CD630DERM_14860]		-0.1	-0.08	0.04	0	0.00579275	0.767263	0.00882888	0.0238058
CDIF630erm_01651	[gene=CD630DERM_14870]		0.02	0.12	1.03	0.74	0.351781	0.409037	1.57021e-05	5.2334e-05
CDIF630erm_01652	[gene=CD630DERM_14880]		-0.35	-0.21	0.09	-0.02	0.0219648	0.543779	0.0166081	0.930429
CDIF630erm_01654	[gene=CD630DERM_14890]	metN	-0.92	-0.75	-0.13	-0.49	0.00475953	0.0610344	0.00156664	0.000394222
CDIF630erm_01655	[gene=CD630DERM_14900]	metI	-0.96	-0.6	0.57	-0.04	0.00308091	0.190878	0.0921623	0.00377645
CDIF630erm_01656	[gene=CD630DERM_14910]	metQ	-0.73	-0.42	0.48	-0.1	0.00472406	0.158033	0.328118	0.000471086
CDIF630erm_01657	[gene=CD630DERM_14920]		0.66	0.71	-0.08	-0.26	0.00143852	0.0445367	0.90493	0.000957533
CDIF630erm_01658	[gene=CD630DERM_14930]		0.59	0.55	0.08	0.06	0.00213828	0.0943943	0.0119335	0.0148828
CDIF630erm_01659	[gene=CD630DERM_14940]		-0.56	-0.68	-0.09	0.2	0.000543567	0.053612	0.000257541	0.000679214
CDIF630erm_01660	[gene=CD630DERM_14950]	proC1	-0.56	-0.58	-0.36	0.19	0.000725226	0.0450704	0.000123472	0.000384564
CDIF630erm_01661	[gene=CD630DERM_14960]		-0.35	-0.35	-0.12	-0.42	0.00204782	0.130151	0.0100382	0.000108083
CDIF630erm_01662	[gene=CD630DERM_14970]		0.05	-0.1	0.4	-0.23	0.345967	0.213297	0.0118145	0.000146538
CDIF630erm_01663	[gene=CD630DERM_14980]	sigA2	0.74	0.95	0.74	0.22	0.00195352	0.0921246	0.000412575	0.0735724
CDIF630erm_01664	[gene=CD630DERM_14990]		0.02	0.38	0.83	0.68	0.343898	0.944893	0.00763702	0.00502084
CDIF630erm_01665	[gene=CD630DERM_15000]	tlpB3	0.11	-0.3	-0.22	0	0.689624	0.238752	0.000273571	0.0349106
CDIF630erm_01667	[gene=CD630DERM_15020]	deoC	-0.11	0.14	0.66	0.33	0.0236117	0.771671	0.000833572	0.24823
CDIF630erm_01668	[gene=CD630DERM_15030]		-0.07	0.01	0.39	0.32	0.0695565	0.712017	8.95073e-05	0.000244348
CDIF630erm_01669	[gene=CD630DERM_15040]		0	-0.04	0.06	-0.07	0.718412	0.928552	0.00836517	0.507583
CDIF630erm_01670	[gene=CD630DERM_15050]		0.02	-0.08	-0.01	-0.06	0.503032	0.650775	0.0939319	0.821928
CDIF630erm_01671	[gene=CD630DERM_15060]		-0.39	-0.22	0.28	0.04	0.00391252	0.690158	0.00151988	0.105425
CDIF630erm_01672	[gene=CD630DERM_15070]		-0.17	0.01	0.33	0.51	0.0567363	0.803727	0.000330653	0.000740051
	[gene=CD630DERM_15071]		-0.25	-0.34	-0.4	-0.2	0.0129991	0.109131	0.0147822	0.105874
CDIF630erm_01673	[gene=CD630DERM_15080]		-0.14	-0.24	-0.02	0.24	0.117161	0.477802	0.140275	0.00431494
CDIF630erm_01674	[gene=CD630DERM_15090]		-0.26	-0.21	-0.08	0.02	0.0132136	0.367846	0.788691	0.175333
CDIF630erm_01675	[gene=CD630DERM_15100]		0.7	1.33	0.3	0.18	0.00125133	0.093894	0.000256421	0.00184415
CDIF630erm_01676	[gene=CD630DERM_15110]	cotB	0.05	0.12	0.15	0.24	0.0349575	0.288554	0.00376114	4.02601e-05
CDIF630erm_01677	[gene=CD630DERM_15111]		0.19	0.21	-0.54	-0.55	0.124574	0.790344	0.000389946	1.29007e-05
CDIF630erm_01678	[gene=CD630DERM_15120]	panC	2	3.65	0.72	0.39	0.0794378	0.051379	0.00012862	0.00011141
CDIF630erm_01679	[gene=CD630DERM_15130]	panB	2.11	4.57	0.24	0.57	0.0811374	0.0207142	0.000196821	2.46579e-05
CDIF630erm_01680	[gene=CD630DERM_15140]		1.65	2.92	-0.01	0.14	0.0905169	0.0664142	0.0562686	0.00114707
CDIF630erm_01681	[gene=CD630DERM_15150]	pdcA	0.27	0.23	-0.12	0.04	0.0166206	0.402463	0.0604493	0.0184622
CDIF630erm_01682	[gene=CD630DERM_15152]		0.03	0.03	0.09	0.09	0.0394669	0.523616	0.0104841	0.000995265
CDIF630erm_01683	[gene=CD630DERM_15160]		-0.12	-0.32	-0.49	-0.25	0.0406685	0.20049	3.65449e-05	0.0124332
CDIF630erm_01684	[gene=CD630DERM_15170]	feoB2	0.3	0.17	-0.1	0.3	0.00249931	0.460404	0.860707	0.00964372
CDIF630erm_01685	[gene=CD630DERM_15180]	feoA3	0.21	0.06	-0.19	0.13	0.00643696	0.965487	0.0546442	0.0511441
CDIF630erm_01686	[gene=CD630DERM_15190]		0.28	0.02	-0.24	-0.29	0.00120076	0.997303	0.00688909	0.000166683
CDIF630erm_01687	[gene=CD630DERM_15200]		0.16	0.01	0.01	0.02	0.00166576	0.721595	0.0819887	0.00783631
CDIF630erm_01689	[gene=CD630DERM_15210]	tyrS	0.65	0.53	-0.17	-0.37	0.00086753	0.247422	0.000165008	0.000339213
CDIF630erm_01690	[gene=CD630DERM_15220]	pgdA1	-0.57	-0.63	-0.13	-0.18	0.000879161	0.0428703	0.000307479	0.000226834
CDIF630erm_01691	[gene=CD630DERM_15230]		0.2	-0.08	-0.03	0.71	0.0774349	0.781333	0.834857	0.00029828
CDIF630erm_01692	[gene=CD630DERM_15240]	rbr3	1.66	1.35	2.08	2.6	0.00478222	0.687823	0.618538	0.00457722
CDIF630erm_01693	[gene=CD630DERM_15250]		0.68	0.68	1.22	1.25	0.00747746	0.0924002	9.69006e-05	7.11258e-05
CDIF630erm_01694	[gene=CD630DERM_15260]	pyrC	0.47	0.38	0.04	0.24	0.00971943	0.246749	0.0211943	0.0897706
CDIF630erm_01695	[gene=CD630DERM_15270]		-0.12	-0.1	-0.14	-0.14	0.0166206	0.364532	0.000159058	0.00062976
CDIF630erm_01696	[gene=CD630DERM_15280]		-0.11	-0.14	0.3	-0.1	0.00834515	0.210582	0.0296968	0.000248714
CDIF630erm_01697	[gene=CD630DERM_15290]		-0.11	-0.29	-0.33	-0.18	0.00891096	0.20765	1.96665e-05	0.00146027
CDIF630erm_01698	[gene=CD630DERM_15300]		-0.13	-0.1	-0.1	-0.14	0.00372721	0.539467	0.458015	0.0122156
CDIF630erm_01699	[gene=CD630DERM_15310]		-0.23	-0.19	-0.17	-0.25	0.000905421	0.247356	0.0443043	0.00265225
CDIF630erm_01700	[gene=CD630DERM_15320]		0.02	0.23	0.86	0.9	0.140207	0.230763	5.21318e-05	2.2808e-05
CDIF630erm_01701	[gene=CD630DERM_15330]		0.01	0.15	0.59	0.38	0.196643	0.263674	2.29436e-05	0.00121408
CDIF630erm_01702	[gene=CD630DERM_15340]		0.12	0.19	0.13	0.13	0.0564161	0.316289	0.0512259	0.269761
CDIF630erm_01703	[gene=CD630DERM_15350]	sseA1	-0.1	0.26	1.06	0.53	0.0398832	0.60575	0.00140524	0.950344
CDIF630erm_01704	[gene=CD630DERM_15360]	nfnA	1.49	1.87	0.69	1.17	0.00389598	0.093894	0.43113	0.000309388
CDIF630erm_01705	[gene=CD630DERM_15370]	nfnB	1.58	2.33	0.78	1.18	0.00352891	0.0262968	0.236927	0.000205524
CDIF630erm_01706	[gene=CD630DERM_15380]		0.58	0.3	-0.47	-0.15	0.00588605	0.837837	0.00062669	0.00512054
CDIF630erm_01707	[gene=CD630DERM_15390]		0.08	0.23	0.57	0.8	0.0321904	0.237073	0.000942363	6.84223e-05
CDIF630erm_01708	[gene=CD630DERM_15400]		0.01	-0.06	0.21	0.1	0.500769	0.931483	0.000205454	0.00228542
CDIF630erm_01709	[gene=CD630DERM_15410]		-0.02	-0.42	-0.04	0.87	0.47317	0.108149	0.0022005	0.00339121
CDIF630erm_01710	[gene=CD630DERM_15420]		-0.38	-0.89	-0.4	0.11	0.0320526	0.051772	0.000163038	0.0353469
CDIF630erm_01711	[gene=CD630DERM_15430]		0.18	0	0.23	0.43	0.0183545	0.648993	0.00012578	5.0367e-05
CDIF630erm_01712	[gene=CD630DERM_15431]		0.33	0.93	-0.15	0.02	0.0222714	0.153391	0.0613079	0.0759304
CDIF630erm_01713	[gene=CD630DERM_15450]		-0.3	-0.27	-0.29	-0.39	0.00283456	0.21843	0.020447	0.000163278
CDIF630erm_01714	[gene=CD630DERM_15460]		-0.33	-0.05	0.14	0.13	0.0626779	0.910856	0.452176	0.654586
CDIF630erm_01715	[gene=CD630DERM_15461]		-0.47	-0.36	-0.91	-0.78	0.0043793	0.254568	1.57719e-05	8.76959e-06
CDIF630erm_01716	[gene=CD630DERM_15470]	hisZ	0.32	0.06	-0.21	0.04	0.00339332	0.893622	0.00077534	0.560308
CDIF630erm_01717	[gene=CD630DERM_15480]	hisG	0.36	0.13	-0.29	0.1	0.00199037	0.976606	0.00228821	0.222769
CDIF630erm_01718	[gene=CD630DERM_15490]	hisC1	0.36	0.08	-0.68	0	0.00199539	0.856864	1.45128e-05	0.284471
CDIF630erm_01719	[gene=CD630DERM_15500]	hisB	0.39	0.25	-0.37	0.14	0.00211547	0.495647	0.000509345	0.0618176
CDIF630erm_01720	[gene=CD630DERM_15510]	hisH	0.43	0.38	-0.28	0.47	0.0018381	0.437102	0.006497	0.00346788
CDIF630erm_01721	[gene=CD630DERM_15520]	hisA	0.46	0.58	0.21	0.94	0.00282974	0.194333	0.141726	0.000988756
CDIF630erm_01722	[gene=CD630DERM_15530]	hisF	0.55	0.91	0.98	1.33	0.00196379	0.1035	6.49599e-05	0.00046567
CDIF630erm_01723	[gene=CD630DERM_15540]	hisI	0.51	0.79	0.07	0.77	0.000916961	0.103392	0.63268	0.00144876
CDIF630erm_01724	[gene=CD630DERM_15550]	steT1	0.74	0.14	0.06	-0.18	0.00199037	0.438354	0.100961	0.00626399
CDIF630erm_01725	[gene=CD630DERM_15560]		-0.12	-0.23	-0.13	-0.1	0.0142624	0.238957	0.00651761	0.0158019
CDIF630erm_01726	[gene=CD630DERM_15570]		-0.18	-0.63	-0.75	-0.69	0.0102751	0.146143	7.53533e-05	0.000132386
CDIF630erm_01727	[gene=CD630DERM_15580]	csfV	-0.16	-0.61	-0.85	-0.83	0.0215684	0.167317	5.03598e-05	8.43025e-05
CDIF630erm_01728	[gene=CD630DERM_15590]	rsiV	-0.14	-0.44	-0.48	-0.51	0.0438785	0.176362	0.000650311	0.000119629
CDIF630erm_01729	[gene=CD630DERM_15600]		0.18	-0.31	-0.61	-0.29	0.0506363	0.241817	2.10115e-05	0.022603
CDIF630erm_01730	[gene=CD630DERM_15610]		0.42	-0.07	-0.04	0.52	0.00607971	0.43926	0.00561971	0.00190941
CDIF630erm_01731	[gene=CD630DERM_15620]		0.34	-0.4	-0.63	-0.1	0.00585419	0.227124	0.000181853	0.0736818
CDIF630erm_01733	[gene=CD630DERM_15640]		0.03	0.02	-0.08	-0.15	0.29429	0.830709	0.691241	0.00934794
CDIF630erm_01734	[gene=CD630DERM_15650]	ilvC	0.19	0.15	0	-0.03	0.00401165	0.275189	0.0216727	0.193937
CDIF630erm_01735	[gene=CD630DERM_15660]	ilvB	0.22	0.37	0.52	0.34	0.00199539	0.12194	0.000468484	0.000554908
CDIF630erm_01736	[gene=CD630DERM_15670]	cotG	0.05	0.21	0.49	0.45	0.0263997	0.201162	2.94234e-05	0.000114045
CDIF630erm_01737	[gene=CD630DERM_15680]	yyaL	1.27	0.67	0.55	2.47	0.00237953	0.0500768	0.000254565	2.06608e-05
CDIF630erm_01738	[gene=CD630DERM_15690]		-0.27	-0.33	-0.38	-0.38	0.00367919	0.137737	0.000178081	5.26427e-05
CDIF630erm_01739	[gene=CD630DERM_15700]		0.05	-0.06	0.11	0.18	0.104688	0.894443	0.00581231	0.00199831
CDIF630erm_01740	[gene=CD630DERM_15710]	tlpB4	0.03	-0.12	-0.09	-0.03	0.673851	0.453103	0.111697	0.87657
CDIF630erm_01741	[gene=CD630DERM_15720]		0.13	-0.28	-0.41	-0.04	0.741666	0.247356	0.000140867	0.0429545
CDIF630erm_01742	[gene=CD630DERM_15730]		-0.04	0.32	1.02	0.47	0.0721376	0.734616	0.000152851	0.0161657
CDIF630erm_01743	[gene=CD630DERM_15740]		-0.04	-0.05	-0.15	-0.15	0.401645	0.878343	0.0319446	0.0032775
CDIF630erm_01744	[gene=CD630DERM_15750]		-0.08	0.09	0.22	0.19	0.0331082	0.373745	0.00219923	0.00207595
CDIF630erm_01745	[gene=CD630DERM_15760]		0.8	0.36	0.07	1.22	0.000795814	0.429864	0.701592	1.06804e-05
CDIF630erm_01746	[gene=CD630DERM_15770]	pgcA1	1.02	0.53	0.21	1.77	0.000656598	0.308916	0.51279	2.47707e-05
CDIF630erm_01747	[gene=CD630DERM_15780]		0.15	0.03	0.08	0.12	0.00747969	0.61061	0.00182991	0.000513051
CDIF630erm_01748	[gene=CD630DERM_15790]		-0.77	-0.84	-0.51	-0.37	0.000448418	0.0293433	2.25108e-05	0.000209742
CDIF630erm_01751	[gene=CD630DERM_15800]	hom2	1.1	0.7	0.23	0.17	0.000424463	0.0607453	0.000228768	0.0302129
CDIF630erm_01752	[gene=CD630DERM_15810]		1.31	1.57	-0.16	-0.21	0.000391069	0.098937	0.0816251	0.00279606
CDIF630erm_01753	[gene=CD630DERM_15820]	hisD	0.64	0.58	0.4	0.37	0.00086753	0.0679102	0.000221362	0.000483409
CDIF630erm_01754	[gene=CD630DERM_15830]		0.24	0.33	0.25	0.3	0.00264452	0.103016	0.000268921	0.00325689
CDIF630erm_01755	[gene=CD630DERM_15831]		0.24	0.18	0.81	0.1	0.0179421	0.789491	0.0758329	0.0241197
CDIF630erm_01756	[gene=CD630DERM_15840]		-0.07	0.06	0.28	-0.12	0.266489	0.463806	0.00974953	0.200629
CDIF630erm_01757	[gene=CD630DERM_15850]		-0.02	0.47	1.11	0.68	0.115635	0.249585	2.33564e-05	9.4046e-05
CDIF630erm_01758	[gene=CD630DERM_15860]		-0.08	-0.07	-0.01	-0.01	0.0163842	0.746247	0.13436	0.106169
CDIF630erm_01759	[gene=CD630DERM_15870]	rbsA2	-0.11	-0.06	0.21	0.12	0.0051547	0.928923	0.000151745	0.000556692
CDIF630erm_01760	[gene=CD630DERM_15880]	rbsC1	-0.02	0.01	0.35	0.19	0.501965	0.554078	5.20139e-05	0.000395769
CDIF630erm_01761	[gene=CD630DERM_15890]	rbsB2	0	0.43	1.37	0.5	0.749369	0.212377	8.10595e-06	0.000539679
CDIF630erm_01762	[gene=CD630DERM_15900]		0.52	0.28	1.35	2.71	0.00517485	0.729188	0.000900635	8.57791e-06
CDIF630erm_01764	[gene=CD630DERM_15910]	kdpA	0.06	0.05	0.3	0.22	0.0321904	0.450159	4.25591e-05	0.000133662
CDIF630erm_01765	[gene=CD630DERM_15920]	kdpB	0.12	0.62	1.68	1.22	0.0123334	0.173365	9.37566e-06	4.05983e-05
CDIF630erm_01766	[gene=CD630DERM_15930]	kdpC	0.15	0.24	0.32	0.22	0.00181526	0.144365	0.000238605	0.000233931
CDIF630erm_01767	[gene=CD630DERM_15940]	cysK	4.75	3.23	1.28	1.86	0.00124452	0.0262968	0.0422922	0.00832634
CDIF630erm_01768	[gene=CD630DERM_15950]	cysE	4.99	4.12	2.07	2.65	0.000994176	0.00667052	0.00213566	0.00242096
CDIF630erm_01769	[gene=CD630DERM_15951]		5.01	3.74	0.49	1.84	0.0011323	0.00667052	0.606826	0.0084668
CDIF630erm_01770	[gene=CD630DERM_15960]	map2	-0.71	-0.45	-0.21	-0.18	0.000430793	0.0804117	0.000626667	0.0146043
CDIF630erm_01771	[gene=CD630DERM_15970]	zmp	0.22	0	0.14	0.1	0.405419	0.811094	0.000750076	0.00151323
CDIF630erm_01772	[gene=CD630DERM_15980]		0	-0.02	-0.01	0	0.66283	0.919928	0.949233	0.242587
CDIF630erm_01774	[gene=CD630DERM_15990]	thiD	-0.24	0.31	1	0.33	0.0392689	0.492721	0.00195298	0.469962
CDIF630erm_01775	[gene=CD630DERM_16000]	thiM	-0.28	-0.03	-0.19	-0.55	0.0274531	0.607758	0.00349228	0.00022903
CDIF630erm_01776	[gene=CD630DERM_16010]	thiE1	-0.28	-0.12	-0.13	-0.51	0.0293013	0.439471	0.000851944	0.00019258
CDIF630erm_01777	[gene=CD630DERM_16020]		-0.44	-0.22	-0.11	-0.63	0.00157935	0.125411	7.76327e-05	5.72316e-05
CDIF630erm_01778	[gene=CD630DERM_16030]		0.12	-0.04	0.45	0.28	0.0037793	0.650157	1.76488e-05	5.2334e-05
CDIF630erm_01779	[gene=CD630DERM_16040]		-0.05	-0.02	0.17	0.15	0.0852564	0.741699	0.000545455	0.000526679
CDIF630erm_01780	[gene=CD630DERM_16050]		0.11	0.28	0.66	0.72	0.00318168	0.167344	1.80764e-05	1.58263e-05
CDIF630erm_01782	[gene=CD630DERM_16060]		-0.02	0.29	0.57	0.77	0.159672	0.338498	7.46572e-05	5.24991e-05
CDIF630erm_01783	[gene=CD630DERM_16070]		-0.05	-0.03	0.03	0.02	0.0932328	0.961095	0.0147317	0.0216691
CDIF630erm_01784	[gene=CD630DERM_16080]		0.03	0.03	0.19	0.16	0.0500534	0.555031	0.000318442	0.000316281
CDIF630erm_01785	[gene=CD630DERM_16090]		-0.11	-0.12	-0.06	-0.1	0.00608632	0.45455	0.41908	0.10853
CDIF630erm_01786	[gene=CD630DERM_16100]		0.04	0.05	0.13	0.1	0.0677107	0.483659	0.000910078	0.000866104
CDIF630erm_01787	[gene=CD630DERM_16110]		0.02	0.04	0.14	0.05	0.179321	0.506855	0.00136108	0.00364811
CDIF630erm_01788	[gene=CD630DERM_16120]		0.72	0.71	0.69	0.77	0.00330495	0.0500768	4.30789e-05	1.63796e-05
CDIF630erm_01789	[gene=CD630DERM_16130]	cotA	-0.06	0.16	0.39	0.26	0.136761	0.276331	2.44973e-05	0.000119307
CDIF630erm_01790	[gene=CD630DERM_16140]		-0.2	0.08	0.77	0.55	0.00293391	0.495647	0.00027323	0.000738558
CDIF630erm_01791	[gene=CD630DERM_16150]		-0.29	-0.18	-0.29	-0.07	0.00127054	0.515243	0.00761158	0.0940427
CDIF630erm_01792	[gene=CD630DERM_16160]		-0.27	-0.41	-0.19	-0.19	0.00812729	0.0934969	0.012961	0.00175861
CDIF630erm_01793	[gene=CD630DERM_16170]		-0.26	-0.47	-0.73	-0.59	0.00528815	0.106966	1.60344e-05	0.000299909
CDIF630erm_01794	[gene=CD630DERM_16180]		-0.16	-0.12	0.09	-0.09	0.0399904	0.566596	0.0776337	0.0741926
CDIF630erm_01795	[gene=CD630DERM_16190]		-0.04	0.15	0.48	0.35	0.576598	0.324404	0.000306842	0.0015756
CDIF630erm_01796	[gene=CD630DERM_16200]		-0.13	-0.32	0.06	0.24	0.0418443	0.149786	0.740387	0.0449626
CDIF630erm_01797	[gene=CD630DERM_16210]		0.01	-0.1	0.48	0.47	0.754264	0.879379	0.00129438	0.000881773
CDIF630erm_01799	[gene=CD630DERM_16220]		0.77	0.34	-0.09	0.5	0.00060789	0.401797	0.169556	0.000951644
CDIF630erm_01800	[gene=CD630DERM_16230]	fprAnorR	2.59	2.39	2.9	4.44	0.000601299	0.0306582	8.92244e-05	3.73379e-05
CDIF630erm_01801	[gene=CD630DERM_16240]	vanR	0.49	0.1	0.03	0.42	0.00222349	0.877763	0.665805	0.000410785
CDIF630erm_01802	[gene=CD630DERM_16250]	vanS	0.43	0.1	0.04	0.34	0.0138024	0.876142	0.633853	0.00141217
CDIF630erm_01803	[gene=CD630DERM_16260]	vanG	-0.12	-0.09	0.06	1.91	0.00553265	0.735995	0.00726001	1.44317e-05
CDIF630erm_01804	[gene=CD630DERM_16270]	vanY1	0.05	0.13	0.33	1.77	0.0832305	0.264492	2.79262e-05	1.52952e-05
CDIF630erm_01805	[gene=CD630DERM_16280]	vanTG	-0.01	-0.03	0.09	1.27	0.693298	0.851716	0.00183303	1.72781e-05
CDIF630erm_01806	[gene=CD630DERM_16290]		-0.25	-0.11	-0.02	-0.13	0.00285064	0.865352	0.68622	0.028496
CDIF630erm_01807	[gene=CD630DERM_16300]		-0.22	-0.08	0.62	0.37	0.003383	0.985021	4.86307e-05	0.0108128
CDIF630erm_01808	[gene=CD630DERM_16310]	sodA	0.09	0.1	0.36	0.29	0.0104796	0.324404	2.79262e-05	3.87284e-05
CDIF630erm_01809	[gene=CD630DERM_16320]	asnB2	-0.15	0.07	0.61	0.4	0.00725602	0.662561	0.00024177	0.00103701
CDIF630erm_01810	[gene=CD630DERM_16330]		-0.01	0.03	-0.07	-0.2	0.870499	0.721858	0.613207	0.00294041
CDIF630erm_01811	[gene=CD630DERM_16340]	terD1	0.19	0.02	-0.42	-0.48	0.367547	0.486689	0.000156163	0.000344421
CDIF630erm_01812	[gene=CD630DERM_16350]	terD2	0.25	0.13	-0.28	-0.77	0.176707	0.499734	2.76666e-05	0.00012043
CDIF630erm_01813	[gene=CD630DERM_16360]	terD3	0.05	-0.04	0.02	-0.47	0.604806	0.317198	7.36967e-05	0.000550963
CDIF630erm_01814	[gene=CD630DERM_16370]		0.1	0.01	0.71	-0.16	0.908703	0.335323	0.598597	0.0103827
CDIF630erm_01815	[gene=CD630DERM_16380]		0.2	-0.3	-0.75	-0.84	0.406527	0.310769	6.19153e-06	3.85637e-05
CDIF630erm_01816	[gene=CD630DERM_16390]		0.3	0.14	-0.21	-0.48	0.138165	0.759074	0.000271065	0.000834692
CDIF630erm_01817	[gene=CD630DERM_16400]		0.2	-0.24	-0.59	-0.75	0.0992552	0.312202	1.39812e-05	1.20185e-05
CDIF630erm_01818	[gene=CD630DERM_16410]		0.18	-0.17	-0.48	-0.41	0.0569054	0.367616	4.80854e-05	0.000152353
CDIF630erm_01819	[gene=CD630DERM_16420]	stiP	0.2	0.16	0.06	-0.03	0.0317516	0.342118	0.627571	0.550546
CDIF630erm_01820	[gene=CD630DERM_16430]		0.06	-0.14	-0.41	-0.56	0.221043	0.404231	6.49599e-05	3.79379e-05
CDIF630erm_01821	[gene=CD630DERM_16440]		-0.07	0.06	0.8	0.56	0.111504	0.867464	5.70026e-05	0.000166683
CDIF630erm_01822	[gene=CD630DERM_16450]		0.33	0.63	0.49	0.66	0.0172771	0.211916	0.000184351	0.000683153
CDIF630erm_01823	[gene=CD630DERM_16460]		0.3	0.66	0.89	0.58	0.0101786	0.216608	3.94571e-05	0.000539679
CDIF630erm_01824	[gene=CD630DERM_16470]	yclN	-1.52	-0.94	-0.25	-0.57	0.000543567	0.0500768	0.000238605	1.94613e-05
CDIF630erm_01825	[gene=CD630DERM_16480]	yclO	-1.18	-0.74	-0.28	-0.45	0.000430793	0.0900066	0.0184203	0.000104508
CDIF630erm_01826	[gene=CD630DERM_16490]	yclP	-1.92	-1.28	-0.5	-0.86	0.000391069	0.0262968	4.92256e-05	1.23477e-05
CDIF630erm_01827	[gene=CD630DERM_16500]	yclQ	-1.79	-1.07	0.29	-0.27	0.000430793	0.0448623	0.725655	0.00311263
CDIF630erm_01828	[gene=CD630DERM_16510]		0.1	-0.02	-0.18	-0.19	0.0654871	0.893361	0.0383179	0.00147201
CDIF630erm_01829	[gene=CD630DERM_16520]		0.19	0.02	-0.54	-0.91	0.556344	0.581101	2.66268e-05	2.85839e-05
CDIF630erm_01830	[gene=CD630DERM_16530]		-0.79	-0.63	-0.13	-0.42	0.002773	0.12935	0.00458246	7.51978e-05
CDIF630erm_01832	[gene=CD630DERM_16540]	lplA	-0.38	-0.31	-0.15	-0.39	0.000732682	0.182428	0.00214441	0.000158703
CDIF630erm_01834	[gene=CD630DERM_16550]		0.23	0.24	0.22	0.31	0.00310614	0.196058	0.00903381	0.00079426
CDIF630erm_01836	[gene=CD630DERM_16560]		-0.04	0.04	0.19	0.12	0.229363	0.517292	0.000626667	0.00136115
CDIF630erm_01838	[gene=CD630DERM_16570]	gcvTPA	0.05	0.06	0.19	0.26	0.147538	0.471516	0.000287	0.020013
CDIF630erm_01839	[gene=CD630DERM_16580]	gcvPB	0.33	0.48	0.36	0.18	0.00222349	0.15924	0.000152539	0.000955331
CDIF630erm_01840	[gene=CD630DERM_16590]		-0.54	-0.6	-0.42	-0.13	0.00684399	0.0445367	0.00161005	0.219625
CDIF630erm_01841	[gene=CD630DERM_16600]		-0.2	0.03	0.31	-0.16	0.00135039	0.982249	0.00145943	0.00964563
	[gene=CD630DERM_16601]		-0.01	-0.14	-0.49	0.04	0.720707	0.408348	0.00179747	0.850184
CDIF630erm_01842	[gene=CD630DERM_16610]	tlpB5	0.18	-0.31	-0.37	-0.03	0.38474	0.249031	0.000566157	0.0424305
CDIF630erm_01843	[gene=CD630DERM_16620]		-0.09	-0.1	-0.31	-0.28	0.0133078	0.516702	0.0126917	0.00028921
CDIF630erm_01844	[gene=CD630DERM_16630]	guaD	-0.24	-0.31	-0.27	-0.33	0.0606528	0.175657	0.000911028	0.000120684
CDIF630erm_01845	[gene=CD630DERM_16631]		0.09	0.08	0.19	0.14	0.00196265	0.374217	0.000379917	0.000251464
CDIF630erm_01846	[gene=CD630DERM_16632]		-0.16	-0.2	-0.01	-0.18	0.0215868	0.214779	0.0485118	0.0929728
CDIF630erm_01848	[gene=CD630DERM_16640]		-0.06	-0.22	-0.4	-0.29	0.161292	0.26923	0.000816471	0.000237536
CDIF630erm_01849	[gene=CD630DERM_16650]	cysM	-0.16	0.1	0.38	0.23	0.0367587	0.363763	0.000278164	0.000444077
CDIF630erm_01850	[gene=CD630DERM_16660]		0.06	0.11	0.23	0.17	0.0118978	0.281363	0.000221582	0.000137219
CDIF630erm_01851	[gene=CD630DERM_16670]	maa2	-0.15	0.23	1	0.8	0.011469	0.463601	0.000227954	5.94723e-05
CDIF630erm_01852	[gene=CD630DERM_16671]		-0.4	-0.33	-0.41	0.23	0.00108865	0.111067	0.000295124	0.0216972
CDIF630erm_01853	[gene=CD630DERM_16680]		0.03	0.05	0.33	0.43	0.118077	0.469289	4.42022e-05	2.90125e-05
CDIF630erm_01854	[gene=CD630DERM_16690]		0.02	0.71	1.72	1.13	0.640542	0.222178	8.88397e-06	4.5274e-05
CDIF630erm_01855	[gene=CD630DERM_16700]		0.05	0.16	0.18	0.19	0.0304192	0.211178	0.000120419	7.44349e-05
CDIF630erm_01856	[gene=CD630DERM_16710]		-0.02	0.14	0.59	0.63	0.754264	0.344254	0.00692097	0.000175033
CDIF630erm_01857	[gene=CD630DERM_16720]		0.03	0.02	0.4	0.53	0.0513438	0.943671	0.000181221	3.09939e-05
CDIF630erm_01858	[gene=CD630DERM_16730]		0	0.12	0.27	0.2	0.213767	0.318226	7.78313e-05	0.00031702
	[gene=CD630DERM_16731]		0.03	-0.05	-0.02	0.1	0.128062	0.749376	0.415239	0.00108442
CDIF630erm_01859	[gene=CD630DERM_16740]		-0.32	-0.27	0.03	-0.46	0.00195352	0.176592	0.0375426	0.00020986
CDIF630erm_01860	[gene=CD630DERM_16750]		-0.01	-0.08	0.22	0.12	0.731868	0.469254	0.589724	0.0437735
CDIF630erm_01861	[gene=CD630DERM_16760]	pcp	-0.04	0.07	0.68	0.31	0.164515	0.619651	9.70156e-05	0.00615462
CDIF630erm_01862	[gene=CD630DERM_16770]		0.13	0.17	0.41	0.32	0.00179792	0.205774	2.40646e-05	5.24991e-05
CDIF630erm_01863	[gene=CD630DERM_16780]		0.1	0.2	0.37	0.28	0.00542961	0.17087	2.86899e-05	3.52066e-05
	[gene=CD630DERM_16781]		0.01	0.1	0.21	0.18	0.19644	0.311401	0.000165375	6.77266e-05
CDIF630erm_01864	[gene=CD630DERM_16790]		-0.32	-0.42	-0.37	-0.43	0.00699752	0.0705255	0.00228956	0.00011327
CDIF630erm_01865	[gene=CD630DERM_16800]		-0.3	-0.29	-0.17	-0.26	0.00873767	0.177738	0.181656	0.000857671
CDIF630erm_01866	[gene=CD630DERM_16810]		-0.24	-0.14	-0.02	-0.03	0.0148391	0.707622	0.119803	0.516744
CDIF630erm_01867	[gene=CD630DERM_16820]	iunH	-0.37	-0.58	0.14	-0.75	0.00242042	0.0401231	0.000168785	1.30723e-05
CDIF630erm_01868	[gene=CD630DERM_16830]		-0.4	-0.85	-1.16	-1.76	0.00175427	0.0445367	4.82145e-06	5.40512e-06
CDIF630erm_01869	[gene=CD630DERM_16840]		-0.42	-0.92	-1.2	-1.89	0.0021652	0.060193	4.2342e-06	4.63533e-06
CDIF630erm_01870	[gene=CD630DERM_16850]		-0.29	-0.53	-0.61	-0.7	0.00394391	0.088104	3.6489e-05	1.80159e-05
CDIF630erm_01871	[gene=CD630DERM_16860]		-0.32	-0.73	-0.75	-0.76	0.00196848	0.114582	7.6303e-06	2.28744e-05
CDIF630erm_01872	[gene=CD630DERM_16870]		-0.21	-0.31	0.35	-0.4	0.0020385	0.121057	0.00171929	3.89721e-05
CDIF630erm_01873	[gene=CD630DERM_16880]		-0.19	-0.48	-0.54	-0.47	0.0026462	0.142023	1.22509e-05	0.000803506
CDIF630erm_01874	[gene=CD630DERM_16890]		-0.2	-0.25	-0.24	-0.24	0.0036402	0.172312	0.000718172	0.000366652
CDIF630erm_01875	[gene=CD630DERM_16900]	trxA1	1.72	1.64	1.65	3.24	0.0012293	0.0293433	0.00267317	0.000217549
CDIF630erm_01876	[gene=CD630DERM_16910]	trxB1	1.79	1.73	1.93	3.37	0.00127054	0.0500768	0.00342183	0.000266813
CDIF630erm_01877	[gene=CD630DERM_16920]		0.09	-0.3	-0.26	0.18	0.863139	0.105302	0.0018502	0.00604361
CDIF630erm_01878	[gene=CD630DERM_16930]		0.02	0.02	0.04	0.38	0.0732334	0.0646979	0.000932269	0.000542139
CDIF630erm_01879	[gene=CD630DERM_16940]		0.42	0.19	-0.35	-0.11	0.0284475	0.942557	0.00206384	0.1196
CDIF630erm_01880	[gene=CD630DERM_16950]		-0.34	0.01	0.43	0.28	0.0240024	0.565153	0.00187581	0.00122644
CDIF630erm_01881	[gene=CD630DERM_16960]	alsT	-1.74	-1.61	-0.15	-0.7	0.000681076	0.026403	0.000774521	2.74924e-05
CDIF630erm_01882	[gene=CD630DERM_16970]	ribH	3.87	5.31	-0.34	-0.44	0.00383942	0.00412884	0.0409788	0.0188033
CDIF630erm_01883	[gene=CD630DERM_16980]	ribBA	4.13	5.06	0.62	0.09	0.00177298	0.00550907	0.594023	0.0730751
CDIF630erm_01884	[gene=CD630DERM_16990]	ribE	3.84	4.31	-0.17	-0.24	0.000795814	0.0259057	0.279212	0.0429619
CDIF630erm_01885	[gene=CD630DERM_17000]	ribD	3.87	3.38	-0.06	-0.22	0.000920324	0.0772839	0.832076	0.0314747
CDIF630erm_01887	[gene=CD630DERM_17010]	recQ	0.4	0.65	0.55	0.68	0.00249931	0.0500768	0.000101853	4.86195e-05
CDIF630erm_01889	[gene=CD630DERM_17020]	thiC	0.77	0.01	-0.71	-1.62	0.0104911	0.444058	3.36893e-05	5.14647e-05
CDIF630erm_01890	[gene=CD630DERM_17021]	thiS	0.77	-0.12	-1.41	-2.14	0.00948946	0.390133	8.88397e-06	1.21209e-05
CDIF630erm_01891	[gene=CD630DERM_17030]	thiF	0.94	0.42	-0.64	-1.66	0.00878511	0.770929	4.75951e-05	0.00011141
CDIF630erm_01892	[gene=CD630DERM_17040]	thiG	1.02	0.8	-0.21	-1.03	0.00617665	0.466543	0.0032076	0.000513152
CDIF630erm_01893	[gene=CD630DERM_17050]	thiH1	0.98	0.53	-1.04	-1.79	0.0052516	0.893795	1.57021e-05	2.89823e-05
CDIF630erm_01894	[gene=CD630DERM_17060]	thiE2	0.93	0.51	-1.1	-1.71	0.00532814	0.933558	8.88656e-06	1.27914e-05
CDIF630erm_01895	[gene=CD630DERM_17070]		0.28	0.3	0.25	0.15	0.00124452	0.104795	0.00060471	0.0165837
CDIF630erm_01896	[gene=CD630DERM_17080]		-0.72	-0.79	-0.66	-0.76	0.000543567	0.0399008	2.40128e-05	6.69856e-06
CDIF630erm_01897	[gene=CD630DERM_17090]	mobA	-0.77	-0.99	-0.75	-0.82	0.00109067	0.0524818	3.04993e-05	8.73404e-06
CDIF630erm_01898	[gene=CD630DERM_17100]		-0.68	-1.04	-1.11	-1.09	0.00206023	0.0720509	6.47691e-06	2.80842e-05
CDIF630erm_01899	[gene=CD630DERM_17110]		0.25	1.02	0.16	-0.35	0.0553538	0.144532	0.00338299	3.49456e-05
CDIF630erm_01900	[gene=CD630DERM_17120]	mogA	0.19	-0.23	-0.29	-0.2	0.0104714	0.305939	6.66937e-05	0.00335174
CDIF630erm_01901	[gene=CD630DERM_17130]	moaA	0.16	0	-0.05	-0.05	0.00527149	0.977097	0.429875	0.610263
CDIF630erm_01902	[gene=CD630DERM_17140]	moaC	0.17	-0.12	-0.09	0.07	0.0236475	0.392875	0.00673829	0.982113
CDIF630erm_01903	[gene=CD630DERM_17150]		0.19	0.11	0.38	0.24	0.0194292	0.889155	0.184411	0.382235
	[gene=CD630DERM_17151]		0	-0.31	-0.3	-0.29	0.541628	0.222178	9.48029e-05	0.00178208
CDIF630erm_01905	[gene=CD630DERM_17160]	codB	0.96	0.33	0.25	-0.53	0.000430793	0.782372	0.101505	1.52952e-05
CDIF630erm_01906	[gene=CD630DERM_17170]		0.67	0.5	0.09	-0.16	0.00121352	0.141851	0.0247875	0.00539068
CDIF630erm_01907	[gene=CD630DERM_17180]		0.64	0.42	0.58	-0.01	0.000905421	0.390967	0.847583	0.000252068
CDIF630erm_01908	[gene=CD630DERM_17190]	tlpB6	0.17	-0.29	-0.42	-0.13	0.335592	0.253506	0.000332832	0.026087
CDIF630erm_01910	[gene=CD630DERM_17210]		-0.11	-0.07	0.1	0.29	0.130807	0.819097	0.132369	0.00118697
CDIF630erm_01911	[gene=CD630DERM_17220]		-0.16	-0.26	-0.41	-0.37	0.0117321	0.228505	0.000706856	7.23313e-05
CDIF630erm_01912	[gene=CD630DERM_17230]	plsC1	-0.21	0.05	0.21	0.2	0.00424497	0.495999	0.00107413	0.00694842
CDIF630erm_01913	[gene=CD630DERM_17240]		-0.05	-0.12	-0.23	-0.24	0.261568	0.477802	0.0107561	0.00043391
CDIF630erm_01914	[gene=CD630DERM_17250]		0.03	0.42	0.62	0.49	0.816463	0.172838	2.40128e-05	0.00023582
CDIF630erm_01915	[gene=CD630DERM_17260]		-0.1	-0.15	-0.07	-0.09	0.00324793	0.403915	0.754804	0.0750132
CDIF630erm_01916	[gene=CD630DERM_17270]		-0.58	-0.7	-0.48	-0.58	0.00086516	0.0399008	4.02206e-05	6.21644e-05
CDIF630erm_01917	[gene=CD630DERM_17280]		-0.47	-0.35	-0.09	-0.37	0.000628654	0.127059	0.0783024	0.000219292
CDIF630erm_01918	[gene=CD630DERM_17281]		0.06	-0.22	-0.33	-0.39	0.160343	0.247053	0.00425668	6.11922e-05
CDIF630erm_01919	[gene=CD630DERM_17290]		0	-0.02	0.09	0.02	0.563238	0.758697	0.00176246	0.00759095
CDIF630erm_01920	[gene=CD630DERM_17292]		0.74	0.11	-0.64	0.09	0.00718444	0.775725	0.000117258	0.145952
CDIF630erm_01921	[gene=CD630DERM_17300]	mrp	0.85	0.84	0.92	0.07	0.00213898	0.325544	0.00558975	0.00204128
CDIF630erm_01922	[gene=CD630DERM_17310]		-0.11	-0.11	0.04	-0.14	0.0257558	0.622497	0.426085	0.00107375
CDIF630erm_01923	[gene=CD630DERM_17320]	mtbC	-0.15	0.09	0.88	0.38	0.00510331	0.987482	8.68655e-05	0.679677
CDIF630erm_01924	[gene=CD630DERM_17330]	hemE	0	0.07	0.39	-0.06	0.958752	0.477853	0.00135632	0.16715
CDIF630erm_01925	[gene=CD630DERM_17340]		-0.14	-0.31	-0.29	-0.41	0.0242226	0.200387	0.000213706	5.30465e-05
CDIF630erm_01926	[gene=CD630DERM_17350]	yjjG	-0.13	-0.11	-0.19	-0.24	0.0377571	0.491421	0.0155718	0.00508098
CDIF630erm_01927	[gene=CD630DERM_17360]		-0.15	-0.16	-0.1	-0.22	0.0255668	0.375567	0.667464	0.00578367
CDIF630erm_01928	[gene=CD630DERM_17370]		0.01	-0.05	0.4	0.11	0.491677	0.886013	5.57977e-05	0.0055925
CDIF630erm_01929	[gene=CD630DERM_17380]		0.09	0.13	0.11	0.02	0.0479649	0.247031	0.00197104	0.03535
CDIF630erm_01930	[gene=CD630DERM_17390]		0.03	-0.15	-0.44	-0.49	0.366269	0.478054	7.76327e-05	5.17673e-05
CDIF630erm_01931	[gene=CD630DERM_17400]		0.01	0.42	0.68	0.9	0.397053	0.158599	2.36255e-05	4.24673e-05
CDIF630erm_01935	[gene=CD630DERM_17430]		-0.03	-0.03	0.04	0.02	0.453906	0.902479	0.059515	0.0142129
CDIF630erm_01936	[gene=CD630DERM_17440]		-0.03	0.07	0.09	0.1	0.363908	0.435092	0.00103894	0.00107375
CDIF630erm_01937	[gene=CD630DERM_17450]		-0.12	-0.18	-0.18	-0.26	0.00812729	0.270053	0.0134704	0.000209742
CDIF630erm_01939	[gene=CD630DERM_17451]	feoA4	-0.6	-0.19	-0.6	-0.23	0.00086753	0.728203	2.89937e-05	0.000251077
CDIF630erm_01938	[gene=CD630DERM_17452]	feoA3	-0.23	0.2	-0.12	-0.19	0.00725602	0.29947	0.462197	0.00285022
CDIF630erm_01940	[gene=CD630DERM_17460]	gltC	0.02	0	0.28	0.24	0.120995	0.60575	0.000151745	0.000323284
CDIF630erm_01941	[gene=CD630DERM_17470]	add	-0.17	-0.11	-0.33	-0.37	0.0257558	0.510826	0.000162848	4.36574e-05
CDIF630erm_01942	[gene=CD630DERM_17480]	ecsC	-0.2	-0.23	0	0.12	0.004456	0.176362	0.0265563	0.00352899
CDIF630erm_01943	[gene=CD630DERM_17490]	yjiM	-0.01	0.03	0.5	0.11	0.900882	0.662269	0.00101029	0.28328
CDIF630erm_01944	[gene=CD630DERM_17500]	yjiL	-0.1	0.32	0.74	0.54	0.0254946	0.363763	0.00777454	0.012006
CDIF630erm_01945	[gene=CD630DERM_17510]	cwp13	-0.06	-0.26	-0.2	-0.27	0.0997246	0.19866	0.00013474	0.00169477
CDIF630erm_01946	[gene=CD630DERM_17511]		0.23	1.66	0.97	2.66	0.044694	0.120735	0.000157064	1.18878e-05
CDIF630erm_01947	[gene=CD630DERM_17520]		-0.16	-0.24	-0.41	0	0.0104987	0.278952	0.000298793	0.916751
CDIF630erm_01948	[gene=CD630DERM_17530]		-0.15	-0.11	-0.12	0.24	0.00644421	0.518317	0.0567311	0.141971
CDIF630erm_01949	[gene=CD630DERM_17540]		0.04	0.18	0.32	0.38	0.0687984	0.221111	6.81413e-05	0.00319829
CDIF630erm_01950	[gene=CD630DERM_17550]		0	0.07	0.1	0.18	0.469526	0.390133	0.00330101	0.00461512
CDIF630erm_01951	[gene=CD630DERM_17551]		-0.24	-0.24	-0.22	0.33	0.00692083	0.20131	0.00438907	0.0992008
CDIF630erm_01952	[gene=CD630DERM_17560]	def1	-0.19	-0.16	-0.16	0.55	0.017797	0.301544	0.063312	0.0750148
CDIF630erm_01953	[gene=CD630DERM_17570]		-0.18	-0.34	-0.49	-0.11	0.0129991	0.176266	3.81839e-05	0.47202
CDIF630erm_01954	[gene=CD630DERM_17580]		-0.19	-0.4	-0.31	0.18	0.0163718	0.146143	0.00111183	0.396286
CDIF630erm_01955	[gene=CD630DERM_17590]		-0.14	-0.26	-0.4	-0.49	0.00884636	0.200387	9.70765e-05	2.06703e-05
CDIF630erm_01956	[gene=CD630DERM_17600]		0.11	0.28	0.51	0.51	0.0866203	0.247356	0.00270186	0.000273361
CDIF630erm_01957	[gene=CD630DERM_17610]		0.14	0.13	0.16	0.01	0.0311228	0.310923	0.000727725	0.0434746
CDIF630erm_01959	[gene=CD630DERM_17620]		-0.27	-0.75	-1.02	-0.97	0.025673	0.173466	6.29672e-05	8.92495e-05
CDIF630erm_01960	[gene=CD630DERM_17630]		-0.08	-0.17	-0.18	-0.3	0.0820248	0.362263	0.0155258	6.52229e-05
CDIF630erm_01961	[gene=CD630DERM_17640]		0.55	0.16	-0.44	-0.1	0.00622859	0.856802	2.31295e-05	0.00162221
CDIF630erm_01962	[gene=CD630DERM_17650]		0.59	0.06	-0.53	-0.29	0.00708486	0.671316	4.86307e-05	0.000132994
CDIF630erm_01963	[gene=CD630DERM_17660]		-0.16	-0.08	-0.14	-0.16	0.00912891	0.650751	0.300204	0.0114787
CDIF630erm_01964	[gene=CD630DERM_17670]	gapB	-0.41	-0.11	0.61	1.37	0.0536736	0.869103	0.00133639	7.40151e-05
	[gene=CD630DERM_17671]		-2.04	-1.1	2.58	1.73	0.000391069	0.146647	1.66378e-05	0.00011549
CDIF630erm_01965	[gene=CD630DERM_17680]		-2.07	-1.73	-0.38	-1.13	0.000448418	0.0104713	4.79357e-05	9.62758e-06
CDIF630erm_01966	[gene=CD630DERM_17690]		0.02	-0.21	-0.03	0.08	0.45722	0.213407	0.00189018	0.640474
CDIF630erm_01967	[gene=CD630DERM_17700]	ogt2	-0.05	-0.08	-0.49	-0.57	0.18973	0.745589	8.17791e-05	1.27914e-05
CDIF630erm_01968	[gene=CD630DERM_17710]		0.26	0.79	0.72	0.5	0.0363231	0.181817	0.0302637	0.101861
CDIF630erm_01969	[gene=CD630DERM_17720]		-0.01	0.05	-0.04	-0.1	0.645363	0.500248	0.500903	0.0601759
CDIF630erm_01970	[gene=CD630DERM_17730]		-0.14	-0.35	-0.46	-0.33	0.0650732	0.191733	0.000136125	0.000500149
CDIF630erm_01972	[gene=CD630DERM_17740]		0.25	0.16	0.58	0.4	0.00366076	0.568157	0.283729	0.0266642
CDIF630erm_01973	[gene=CD630DERM_17750]		0.22	0.09	-0.28	-0.32	0.00253819	0.759074	0.00159592	0.000706073
CDIF630erm_01974	[gene=CD630DERM_17760]		0.24	0.41	0.52	0.31	0.00525144	0.114939	0.000385557	0.000307333
CDIF630erm_01975	[gene=CD630DERM_17770]		1.18	0.06	-0.47	0.52	0.00716251	0.650557	3.88351e-05	0.0703679
CDIF630erm_01976	[gene=CD630DERM_17780]		0.94	-0.06	-0.47	0.42	0.000543567	0.595215	0.000148035	0.0026618
CDIF630erm_01977	[gene=CD630DERM_17790]	larE	0.93	0.02	-0.26	0.46	0.000677874	0.66781	0.000128274	0.00111667
CDIF630erm_01978	[gene=CD630DERM_17800]		0.67	-0.03	-0.04	0.3	0.0022171	0.545811	0.0330947	0.0358831
CDIF630erm_01979	[gene=CD630DERM_17810]		0.53	-0.22	-0.55	-0.2	0.00849073	0.34959	0.00015824	0.0317999
CDIF630erm_01980	[gene=CD630DERM_17820]		0.36	-0.04	0.18	0.14	0.112193	0.505891	0.295153	0.61654
CDIF630erm_01981	[gene=CD630DERM_17830]		0.27	0.11	0.23	0.29	0.152133	0.950472	0.966323	0.0393852
CDIF630erm_01982	[gene=CD630DERM_17840]	truA2	0.1	-0.22	-0.22	-0.32	0.901279	0.296637	0.000267871	0.00184106
CDIF630erm_01984	[gene=CD630DERM_17850]	argG	0.02	0.51	0.76	0.3	0.880249	0.146143	0.000261063	0.161033
CDIF630erm_01985	[gene=CD630DERM_17860]		0.08	0.28	0.87	0.43	0.0165012	0.187404	9.42701e-06	5.30465e-05
CDIF630erm_01986	[gene=CD630DERM_17870]		-0.07	-0.11	-0.07	-0.06	0.0279131	0.534269	0.91374	0.946057
CDIF630erm_01987	[gene=CD630DERM_17880]		0.01	0.04	0.09	0.06	0.288983	0.571809	0.0126877	0.00309941
CDIF630erm_01988	[gene=CD630DERM_17890]		0.04	0.32	0.52	0.72	0.162336	0.17059	4.24503e-05	9.33679e-05
CDIF630erm_01989	[gene=CD630DERM_17900]		0.27	-0.05	0.01	0.14	0.0406685	0.849109	0.253273	0.00129746
CDIF630erm_01990	[gene=CD630DERM_17910]		0.2	-0.43	-0.85	-0.45	0.0622413	0.230084	1.60311e-05	0.000373045
CDIF630erm_01991	[gene=CD630DERM_17920]	tdh	-0.12	0.04	0.04	-0.14	0.0383954	0.776075	0.464194	0.00921597
CDIF630erm_01992	[gene=CD630DERM_17930]		-5.5	-4.12	-2.29	-1.94	0.00821218	0.0338747	0.00265039	0.0496398
CDIF630erm_01993	[gene=CD630DERM_17940]		-1.26	-1	-0.8	-0.94	0.014692	0.0414121	0.00682503	0.00862517
CDIF630erm_01994	[gene=CD630DERM_17950]		-1.09	-0.91	-0.7	-0.82	0.0263786	0.0607836	0.0292745	0.0235606
CDIF630erm_01995	[gene=CD630DERM_17960]		0.42	2.22	3.13	6.42	0.0133298	0.134078	4.52887e-05	5.40512e-06
CDIF630erm_01996	[gene=CD630DERM_17970]		0.36	1.99	2.66	5.97	0.00995902	0.148483	4.25591e-05	3.93139e-06
CDIF630erm_01997	[gene=CD630DERM_17980]		-0.01	0.19	0.73	0.61	0.497593	0.623642	6.21283e-05	0.000640116
CDIF630erm_01998	[gene=CD630DERM_17990]	terD4	-0.11	-0.36	-0.16	-0.08	0.0171635	0.148697	8.4448e-05	0.000445825
CDIF630erm_01999	[gene=CD630DERM_18000]	terD5	-0.26	-0.35	-0.04	-0.08	0.00427334	0.125924	0.0304095	0.00094519
CDIF630erm_02000	[gene=CD630DERM_18010]		-0.2	-0.12	-0.31	-0.42	0.0361279	0.464627	6.83078e-05	0.00108442
CDIF630erm_02001	[gene=CD630DERM_18020]		0.21	0.23	0.08	0.22	0.0270364	0.184116	0.00580303	0.000771683
CDIF630erm_02002	[gene=CD630DERM_18030]	cwp23	0.28	0.23	-0.24	-0.01	0.0420054	0.638157	0.000403028	0.737347
CDIF630erm_02003	[gene=CD630DERM_18040]	scrR	-0.08	-0.07	-0.46	-0.47	0.245541	0.987212	4.93962e-05	5.24991e-05
CDIF630erm_02004	[gene=CD630DERM_18050]	scrB	-0.05	0.09	0.22	0.18	0.160034	0.417739	0.00036612	0.000255684
CDIF630erm_02005	[gene=CD630DERM_18060]	scrK	-0.06	-0.07	0.16	0.12	0.129699	0.918368	0.00159997	0.000629925
CDIF630erm_02006	[gene=CD630DERM_18070]		-0.09	0.11	0.32	0.09	0.261075	0.347038	0.000318074	0.0537276
CDIF630erm_02007	[gene=CD630DERM_18080]		-0.04	-0.07	-0.04	-0.12	0.379186	0.795169	0.125045	0.042291
CDIF630erm_02010	[gene=CD630DERM_18100]		0.08	0.02	-0.35	-0.06	0.346361	0.91439	6.27403e-05	0.107801
CDIF630erm_02013	[gene=CD630DERM_18130]		-0.16	-0.18	0.19	-0.29	0.00313626	0.354972	0.179188	0.00144016
CDIF630erm_02014	[gene=CD630DERM_18140]		-0.14	0.04	0.69	0.47	0.0107414	0.647058	0.000161448	0.00429188
CDIF630erm_02015	[gene=CD630DERM_18150]		-0.26	-0.37	0.12	-0.23	0.00241909	0.100828	0.155074	0.00047498
CDIF630erm_02016	[gene=CD630DERM_18160]	cmk	0.13	-0.24	-0.08	0.12	0.198042	0.22763	0.00153289	0.279551
CDIF630erm_02017	[gene=CD630DERM_18170]	plsC2	0.14	-0.28	-0.18	0.04	0.157459	0.212377	0.000206147	0.650109
CDIF630erm_02018	[gene=CD630DERM_18180]	ispH	0.22	-0.33	-0.54	-0.2	0.0278344	0.232173	5.1513e-05	0.0254657
CDIF630erm_02019	[gene=CD630DERM_18190]		0.06	-0.02	0.42	0.39	0.270282	0.923013	0.000588896	0.000695864
CDIF630erm_02020	[gene=CD630DERM_18200]	ade1	-0.04	-0.06	0.03	0.14	0.602847	0.976606	0.134702	0.000359187
CDIF630erm_02021	[gene=CD630DERM_18210]	tlpB7	0.14	-0.29	-0.49	-0.05	0.515207	0.251237	1.66846e-05	0.0312617
CDIF630erm_02023	[gene=CD630DERM_18230]	bcp	1.45	0.46	0.41	1.78	0.00288241	0.91439	0.259127	0.00048752
CDIF630erm_02024	[gene=CD630DERM_18230]		1.48	0.31	-0.03	1.77	0.00399363	0.220177	0.0114872	0.000261523
CDIF630erm_02025	[gene=CD630DERM_18240]		1.42	0.49	0.74	1.95	0.00485725	0.452547	0.0149628	0.00108273
CDIF630erm_02027	[gene=CD630DERM_18250]	metY	-0.69	-0.52	-0.17	-0.49	0.0038334	0.0858999	0.00038295	0.000127716
CDIF630erm_02028	[gene=CD630DERM_18260]	metA	-0.71	-0.59	-0.37	-0.52	0.00292576	0.046597	0.000136854	3.73623e-05
CDIF630erm_02029	[gene=CD630DERM_18270]		0.31	-0.02	-0.53	0.4	0.0547893	0.775147	0.000232538	0.0647131
CDIF630erm_02030	[gene=CD630DERM_18280]	ftsH1	0.48	0.45	0.61	1.1	0.0189412	0.25612	0.000125326	0.000958706
CDIF630erm_02031	[gene=CD630DERM_18290]	kdpD	0.04	0.1	0	0.01	0.137567	0.460404	0.0254833	0.0612037
CDIF630erm_02032	[gene=CD630DERM_18300]	kdpE	0.22	0.23	0.17	0.05	0.00450077	0.374217	0.0564714	0.463115
CDIF630erm_02033	[gene=CD630DERM_18310]		-0.19	-0.3	-0.05	0	0.0125725	0.219889	0.0325264	0.00681421
	[gene=CD630DERM_18311]		-0.06	-0.39	-0.56	-0.39	0.314251	0.1961	1.9746e-05	0.000174267
CDIF630erm_02034	[gene=CD630DERM_18320]	aroF2	0.84	0.82	0	0.32	0.000558032	0.121057	0.698911	6.5195e-05
CDIF630erm_02035	[gene=CD630DERM_18330]	aroB	0.81	1.02	0.2	0.73	0.000505401	0.0655897	0.902824	6.35048e-05
CDIF630erm_02036	[gene=CD630DERM_18340]	aroA	0.79	0.65	-0.37	0.28	0.000548277	0.369082	2.81879e-05	0.00115498
CDIF630erm_02037	[gene=CD630DERM_18350]	aroC	0.82	0.88	-0.06	0.57	0.0007172	0.0379811	0.032033	0.00011977
CDIF630erm_02038	[gene=CD630DERM_18360]	pheA	0.63	0.39	-0.29	0.02	0.000872159	0.438289	0.000145733	0.545549
CDIF630erm_02039	[gene=CD630DERM_18370]	aroE1	0.76	0.51	0.51	0.79	0.000562954	0.109131	0.000308069	5.84544e-05
CDIF630erm_02040	[gene=CD630DERM_18380]	aroK	0.61	0.07	-0.54	-0.28	0.000681076	0.766312	9.3536e-05	0.00665209
CDIF630erm_02041	[gene=CD630DERM_18390]	tyrC	0.62	0.24	-0.23	-0.05	0.000677874	0.842644	0.000478142	0.505065
CDIF630erm_02042	[gene=CD630DERM_18400]		1.1	0.04	-0.25	1.49	0.00299808	0.756618	0.091691	0.000693139
CDIF630erm_02043	[gene=CD630DERM_18410]		0.92	0.63	0.89	1.78	0.00623474	0.119424	0.000245046	0.000502664
CDIF630erm_02044	[gene=CD630DERM_18420]		0.39	0.59	1.29	1.19	0.0943765	0.230756	0.00369455	0.0150099
CDIF630erm_02045	[gene=CD630DERM_18430]		-0.01	0.08	0.12	0.08	0.865358	0.388138	0.00815457	0.00159238
CDIF630erm_04121	[gene=CD630DERM_18440]		0.11	0.23	0.49	0.63	0.0196654	0.1902	1.10805e-05	2.91973e-05
CDIF630erm_02047	[gene=CD630DERM_18450]		-0.23	0.07	0.03	-0.09	0.00241008	0.928552	0.0539279	0.00165625
CDIF630erm_02048	[gene=CD630DERM_18460]		-0.28	0.11	-0.02	-0.26	0.00220445	0.794255	0.0048208	0.000372803
CDIF630erm_02049	[gene=CD630DERM_18470]		0.13	0.29	0.34	0.27	0.00323583	0.112409	2.47095e-05	3.90576e-05
CDIF630erm_02050	[gene=CD630DERM_18480]		0.07	0.14	0.07	0.07	0.00975531	0.228742	0.00304857	0.000661937
CDIF630erm_02051	[gene=CD630DERM_18490]		0.19	0.65	1.08	1	0.0041905	0.078891	8.19893e-06	1.52952e-05
CDIF630erm_02052	[gene=CD630DERM_18500]		0.07	0.25	0.1	0	0.0659624	0.187508	0.00275098	0.0576276
CDIF630erm_02053	[gene=CD630DERM_18510]		0.02	0.52	0.7	0.84	0.353843	0.119834	5.09509e-05	2.80292e-05
CDIF630erm_02054	[gene=CD630DERM_18520]		0.09	1.14	2.45	1.82	0.032422	0.147581	6.44541e-06	2.42522e-05
CDIF630erm_02055	[gene=CD630DERM_18530]		0.1	0.79	0.59	0.59	0.0297468	0.109753	3.47813e-05	5.0367e-05
CDIF630erm_02056	[gene=CD630DERM_18540]		-0.05	0.2	0.04	0.14	0.395984	0.238957	0.00485832	0.000285236
	[gene=CD630DERM_18550]		0.04	0.27	0.7	0.68	0.102721	0.251273	1.60311e-05	2.31215e-05
CDIF630erm_02057	[gene=CD630DERM_18560]		0.16	0.44	1.04	0.89	0.00655128	0.165819	6.97908e-06	1.79361e-05
CDIF630erm_02058	[gene=CD630DERM_18570]		0.01	0.42	1.11	0.77	0.635774	0.157068	1.57416e-05	7.00934e-05
CDIF630erm_02059	[gene=CD630DERM_18571]		-0.19	-0.15	-0.11	-0.05	0.00140721	0.402791	0.561196	0.17284
CDIF630erm_02060	[gene=CD630DERM_18580]		-0.02	0.13	0.49	0.48	0.916902	0.333821	0.00120042	0.000115866
CDIF630erm_02061	[gene=CD630DERM_18590]		0.12	0.64	1.37	0.96	0.0209978	0.158599	1.30812e-05	1.58263e-05
CDIF630erm_02062	[gene=CD630DERM_18591]		-0.04	-0.3	-0.67	-0.62	0.370659	0.212722	4.13336e-05	1.55719e-05
CDIF630erm_02063	[gene=CD630DERM_18600]		0.12	0.09	0.13	-0.01	0.00608397	0.43749	0.00526583	0.544545
CDIF630erm_02064	[gene=CD630DERM_18610]		0.13	0.22	0.07	0	0.00774616	0.302569	0.0479184	0.340844
CDIF630erm_02065	[gene=CD630DERM_18620]		0.13	0.34	0.69	0.64	0.00402543	0.136158	6.97908e-06	1.09781e-05
CDIF630erm_02066	[gene=CD630DERM_18630]		-0.09	-0.05	0.07	0.08	0.0218321	0.9485	0.0133146	0.000498458
CDIF630erm_02067	[gene=CD630DERM_18640]		-0.19	-0.12	1	0.92	0.0129528	0.354972	0.000285609	7.84729e-05
CDIF630erm_02068	[gene=CD630DERM_18650]		-0.16	-0.18	0.06	0.24	0.00268451	0.285635	0.267138	0.0167381
CDIF630erm_02069	[gene=CD630DERM_18660]		-0.05	-0.01	0.01	0.25	0.0399771	0.695044	0.0374713	0.0310503
CDIF630erm_02070	[gene=CD630DERM_18670]		-0.02	0.02	-0.11	0.13	0.0965403	0.734813	0.00329406	0.631737
CDIF630erm_02071	[gene=CD630DERM_18680]		0	0.32	0.42	0.52	0.244138	0.296637	0.00125562	0.0016146
CDIF630erm_02072	[gene=CD630DERM_18690]		-0.08	0.05	0.3	0.36	0.0689318	0.441741	0.000773094	2.48104e-05
CDIF630erm_02073	[gene=CD630DERM_18700]		-0.06	0.04	0.07	0.05	0.0908376	0.487553	0.0131634	0.00212961
CDIF630erm_02074	[gene=CD630DERM_18710]		0.13	0.46	1.46	0.77	0.00671483	0.187709	8.88656e-06	0.000149259
	[gene=CD630DERM_18711]		0.05	-0.01	-0.25	-0.29	0.0350662	0.919242	0.00115344	0.000294026
CDIF630erm_02075	[gene=CD630DERM_18720]		0.08	0.07	0.24	0.04	0.0137381	0.411989	0.00078531	0.348454
CDIF630erm_02076	[gene=CD630DERM_18730]	vexP1	0	-0.04	-0.2	-0.23	0.630682	0.855957	0.0145988	0.000385339
CDIF630erm_02077	[gene=CD630DERM_18740]	vexP2	0.11	0.06	0.08	-0.02	0.00567551	0.374168	0.00279891	0.0848146
CDIF630erm_02078	[gene=CD630DERM_18750]	vexP3	0.09	0.18	0.41	0.26	0.0107468	0.207236	8.89824e-05	0.00671213
CDIF630erm_02079	[gene=CD630DERM_18760]	vncR	0.04	-0.21	-0.41	-0.16	0.437678	0.330809	0.000262725	0.0176518
CDIF630erm_02080	[gene=CD630DERM_18770]	vncS	-0.02	-0.23	-0.45	-0.35	0.854549	0.325732	0.000121748	0.00152974
CDIF630erm_02082	[gene=CD630DERM_18780]		-0.01	0.12	0.26	0.15	0.645874	0.279905	0.000611086	0.000901884
CDIF630erm_02083	[gene=CD630DERM_18782]		0.27	0.7	0.04	0.04	0.00477119	0.0804117	0.0169363	0.00865209
CDIF630erm_04122	[gene=CD630DERM_18783]		0.06	0.55	1.01	1.01	0.277238	0.183319	0.000376969	5.90793e-05
CDIF630erm_02085	[gene=CD630DERM_18800]		0.07	0.46	1.42	0.55	0.0463184	0.222178	9.53182e-06	0.000195764
CDIF630erm_02087	[gene=CD630DERM_18820]		-0.07	-0.06	0.11	0.09	0.0562684	0.968907	0.00181772	0.000321753
CDIF630erm_02088	[gene=CD630DERM_18830]		-0.1	0.04	0.23	0.04	0.0760377	0.482218	0.0047828	0.0487998
CDIF630erm_02089	[gene=CD630DERM_18840]		-0.03	0.05	0.26	0.15	0.224409	0.532962	8.73571e-05	0.000241287
CDIF630erm_02090	[gene=CD630DERM_18850]		-0.02	0.38	1.01	0.63	0.323341	0.310923	1.3417e-05	0.000192949
CDIF630erm_02091	[gene=CD630DERM_18860]		0	0.06	0.13	0.04	0.607505	0.43115	0.000536135	0.00125228
CDIF630erm_02092	[gene=CD630DERM_18870]	csfU	-0.01	0.08	0.53	0.38	0.792471	0.415569	2.65316e-05	5.58454e-05
CDIF630erm_02093	[gene=CD630DERM_18880]	rsiU	0.05	0.14	0.21	0.17	0.0170413	0.2357	7.3809e-05	0.000147432
CDIF630erm_02094	[gene=CD630DERM_18890]		0.14	0.22	0.51	0.3	0.00322454	0.182428	7.93338e-05	0.000159868
CDIF630erm_02095	[gene=CD630DERM_18900]		0.04	0.37	1.18	0.86	0.06778	0.28269	2.72689e-05	0.000109267
CDIF630erm_02097	[gene=CD630DERM_18920]		0	-0.2	-0.42	-0.47	0.901279	0.337657	0.000308102	2.42522e-05
CDIF630erm_02098	[gene=CD630DERM_18930]	proX	-0.16	-0.11	-0.19	-0.06	0.0261342	0.497854	0.155437	0.952807
CDIF630erm_02099	[gene=CD630DERM_18940]		-0.19	-0.18	-0.34	-0.42	0.00437381	0.27401	0.000264527	8.78439e-05
CDIF630erm_02100	[gene=CD630DERM_18950]		0.38	-0.07	-0.6	-0.66	0.0113802	0.468397	2.7703e-05	8.63964e-05
CDIF630erm_02101	[gene=CD630DERM_18960]		0.22	-0.11	-0.52	-0.62	0.00786607	0.514134	0.000102017	1.781e-05
CDIF630erm_02102	[gene=CD630DERM_18970]		0.91	0.18	-0.45	0.95	0.00104882	0.902468	0.0071632	5.18458e-05
CDIF630erm_02103	[gene=CD630DERM_18980]		0.96	0.56	0.68	1.48	0.000543567	0.112819	0.000210778	9.63249e-06
CDIF630erm_02104	[gene=CD630DERM_18990]	comEB1	0.97	0.07	-0.21	0.41	0.00293391	0.838499	0.0504599	0.00304979
CDIF630erm_02105	[gene=CD630DERM_19000]		0.18	0.17	0.02	-0.05	0.0103403	0.17087	0.0664262	0.742965
CDIF630erm_02106	[gene=CD630DERM_19010]		0.12	0.4	0.74	0.45	0.0057434	0.145621	0.00010356	6.17643e-05
CDIF630erm_02107	[gene=CD630DERM_19030]		-0.14	-0.3	-0.25	-0.32	0.133182	0.162781	0.00228864	0.000102489
CDIF630erm_02108	[gene=CD630DERM_19040]		-0.07	-0.06	0.6	0.78	0.0286811	0.864699	4.8272e-05	3.61842e-05
CDIF630erm_02109	[gene=CD630DERM_19050]		0.1	0.2	0.33	0.28	0.00315718	0.171427	3.22952e-05	5.84544e-05
CDIF630erm_02110	[gene=CD630DERM_19060]		-0.01	0	0.13	0.09	0.637406	0.784441	0.00195059	0.00280033
CDIF630erm_02111	[gene=CD630DERM_19070]	eutG	0.11	0.25	0.33	0.27	0.00596677	0.144591	0.000136667	0.00011549
CDIF630erm_02112	[gene=CD630DERM_19080]	eutS	0.03	0.08	0.08	0.11	0.196702	0.377098	0.00310518	0.000487216
CDIF630erm_02113	[gene=CD630DERM_19090]	eutP	0.07	0.11	0.06	0.06	0.0259334	0.312202	0.00526896	0.00165625
CDIF630erm_02114	[gene=CD630DERM_19100]	eutV	-0.31	-0.47	-0.37	-0.45	0.0020225	0.104795	8.86191e-05	5.30465e-05
CDIF630erm_02115	[gene=CD630DERM_19110]	eutW	-0.35	-0.42	-0.36	-0.45	0.0011323	0.114582	0.000114941	5.35179e-05
CDIF630erm_02116	[gene=CD630DERM_19120]	eutA	0.13	0.62	1.59	1.19	0.0471641	0.220335	6.47691e-06	1.03323e-05
CDIF630erm_02117	[gene=CD630DERM_19130]	eutB	0.12	0.22	0.31	0.3	0.00283456	0.16064	3.81839e-05	3.82427e-05
CDIF630erm_02118	[gene=CD630DERM_19140]	eutC	0.1	0.18	0.25	0.2	0.00239274	0.167931	4.80238e-05	0.000127716
CDIF630erm_02119	[gene=CD630DERM_19150]	eutL	0.11	0.12	0.26	0.2	0.00327252	0.282824	6.9321e-05	4.23728e-05
CDIF630erm_02120	[gene=CD630DERM_19160]	eutM	0.03	0.02	0.23	0.15	0.0371828	0.495122	0.000177041	0.000219398
CDIF630erm_02121	[gene=CD630DERM_19170]	eutE	0.07	0.34	0.62	0.38	0.0646247	0.281363	3.81839e-05	0.000157097
CDIF630erm_02122	[gene=CD630DERM_19180]	eutK	-0.06	0.16	0.57	0.2	0.0642469	0.344109	8.90913e-05	0.00280299
CDIF630erm_02123	[gene=CD630DERM_19190]	eutT	-0.02	0.21	0.57	0.23	0.980444	0.231418	1.58834e-05	0.000176497
CDIF630erm_02124	[gene=CD630DERM_19200]	eutD	0.01	0.1	0.22	0.19	0.193412	0.325409	0.00027156	0.000103187
CDIF630erm_02125	[gene=CD630DERM_19210]		0.02	0.11	0.39	0.21	0.202453	0.301192	6.34859e-05	0.000171748
CDIF630erm_02126	[gene=CD630DERM_19220]	eutN	0.12	0.15	0.27	0.34	0.00425465	0.2357	0.00199972	0.000205748
CDIF630erm_02127	[gene=CD630DERM_19230]		-0.02	0	0.1	0.04	0.298168	0.827716	0.00159324	0.00318648
[truncated: 1,767 more rows]
